# Supplementary material for: Synthesis of 4-functionalized-1H-indoles from 2,3-dihalophenols
Source: Royal Society of Chemistry journal article supplement (doi:10.1039/c004360e), 2010-01-01

## Electronic supplementary information (ESI) for

# Synthesis of 4-functionalized-1*H*-indoles from 2,3-dihalophenols

Roberto Sanz,\* Verónica Guilarte, and Nuria García

*Departamento de Química, Área de Química Orgánica, Facultad de Ciencias, Universidad de Burgos, Pza. Misael Bañuelos s/n, 09001-Burgos, Spain*

*rsd@ubu.es*

### Index

|                                                                             |     |
|-----------------------------------------------------------------------------|-----|
| General information                                                         | S1  |
| Experimental procedures and characterization data for synthesized compounds | S2  |
| References                                                                  | S15 |
| Spectra                                                                     | S17 |

### General information

All reactions involving air-sensitive compounds were carried out under a N<sub>2</sub> atmosphere in oven-dried glassware with magnetic stirring. Temperatures are reported as bath temperatures. Solvents used in extraction and purification were distilled prior to use. TLC was performed on alumina-backed plates coated with silica gel 60 with F<sub>254</sub> indicator; the chromatograms were visualized by UV light (254 nm) and/or by staining with a Ce/Mo reagent, anisaldehyde or phosphomolybdic acid solution and subsequent heating. *R<sub>f</sub>* values refer to silica gel. Flash column chromatography was carried out on silica gel 60, 230-400 mesh. Melting points were obtained with open capillary tubes and are uncorrected. <sup>1</sup>H NMR spectra were recorded at 400 or 300 MHz. Chemical shifts are reported in ppm from tetramethylsilane with the residual solvent resonance as the internal standard (CHCl<sub>3</sub>: δ 7.26). Data are reported as follows: chemical shift, multiplicity (s: singlet, br s: broad singlet, d: doublet, dd: doublet of doublets, dt: doublet of triplets, ddd: doublet of doublet of doublets, t: triplet, t app: apparent triplet, td: triplet of doublets, tdd: triplet of doublet of doublets, q: quartet, m: multiplet), coupling constants (*J* in Hz) and integration. <sup>13</sup>C NMR spectra were recorded at 100.6 or 75.4 MHz using broadband proton decoupling. Chemical shifts are reported in ppm with the solvent resonance as internal standard (CDCl<sub>3</sub>: δ 77.16). Carbon multiplicities were assigned by DEPT techniques. GC-MS analysis and low-resolution electron impact mass spectra (EI-LRMS) were obtained at 70 eV on a mass spectrometer and only the molecular ions and/or base peaks as well as significant peaks in MS are given. High-resolution mass spectrometry (HRMS) was carried out on a mass spectrometer. Infrared spectra were recorded with a FT-IR spectrophotometer. Melting points were measured on a Gallenkamp apparatus using open capillary tubes and are uncorrected. All commercially available reagents were used without purification unless otherwise indicated and were purchased from standard chemical suppliers.

## Experimental procedures and characterization data for synthesized compounds

### Synthesis of trifluoroacetamides 1:<sup>1</sup>

**2,2,2-Trifluoro-*N*-(3-fluorophenyl)acetamide (1a):** purification by crystallization from hexane afforded **1a** (6.37 g, 77%) as a white solid: 67–69 °C (lit.<sup>1</sup> mp 69–70 °C); <sup>1</sup>H NMR (300 MHz, CDCl<sub>3</sub>)  $\delta$  = 8.38 (br s, 1H), 7.48 (dt,  $J$  = 10.2, 2.1 Hz, 1H), 7.34 (td,  $J$  = 8.2, 2.1 Hz, 1H), 7.26 (ddd,  $J$  = 8.2, 2.1, 1.1 Hz, 1H), 6.95 (tdd,  $J$  = 8.2, 2.5, 1.1 Hz, 1H); <sup>13</sup>C NMR (75.4 MHz, CDCl<sub>3</sub>)  $\delta$  = 162.9 (d,  $J$  = 246.6 Hz, C), 155.3 (q,  $J$  = 37.8 Hz, C), 136.5 (d,  $J$  = 10.6 Hz, C), 130.7 (d,  $J$  = 9.2 Hz, CH), 116.2 (d,  $J$  = 3.2 Hz, CH), 115.7 (q,  $J$  = 288.4 Hz, C), 113.5 (d,  $J$  = 21.2 Hz, CH), 108.5 (d,  $J$  = 26.6 Hz, CH); EI-LRMS  $m/z$  207 (M<sup>+</sup>, 100), 138 (45), 110 (36), 95 (32), 83 (18).

***N*-(3-Chlorophenyl)-2,2,2-trifluoroacetamide (1b):** purification by crystallization from hexane afforded **1b** (7.15 g, 77%) as a white solid: mp 68–70 °C (lit.<sup>2</sup> mp 66–68 °C); <sup>1</sup>H NMR (300 MHz, CDCl<sub>3</sub>)  $\delta$  = 8.24 (br s, 1H), 7.66 (t,  $J$  = 2.0 Hz, 1H), 7.42 (ddd,  $J$  = 8.0, 2.0, 1.1 Hz, 1H), 7.31 (t,  $J$  = 8.0 Hz, 1H), 7.22 (ddd,  $J$  = 8.0, 2.0, 1.1 Hz, 1H); <sup>13</sup>C NMR (75.4 MHz, CDCl<sub>3</sub>)  $\delta$  = 155.3 (d,  $J$  = 37.8 Hz, 1H), 136.2 (C), 135.2 (C), 130.5 (CH), 126.7 (CH), 121.0 (CH), 118.8 (CH), 115.7 (d,  $J$  = 288.5 Hz, C); EI-LRMS  $m/z$  225 (M<sup>+</sup>+2, 33), 223 (M<sup>+</sup>, 100), 154 (51), 126 (19).

### Synthesis of 2,2,2-trifluoro-*N*-(3-fluoro-2-iodophenyl)acetamide (2a):

To a solution of *N,N,N',N'*-tetramethylethylenediamine (4.54 cm<sup>3</sup>, 30.2 mmol) in anhydrous THF (40 cm<sup>3</sup>) at –80 °C was added slowly *t*BuLi (20 cm<sup>3</sup> of a 1.5M solution in pentane, 30 mmol). After 5 min a solution of **1a** (2.48 g, 12 mmol) in THF (10 cm<sup>3</sup>) was added dropwise avoiding temperature exceed –70 °C. After 40 min at –80 °C, a solution of iodine in THF (10 cm<sup>3</sup>) was added dropwise to the reaction mixture. The resulting solution was stirred for 40 min at –80 °C. Then, the reaction mixture was allowed to reach room temperature and quenched with an aqueous solution of Na<sub>2</sub>S<sub>2</sub>O<sub>3</sub> (10%). The aqueous phase was extracted with Et<sub>2</sub>O (3 × 30 cm<sup>3</sup>), and the combined organic layers were washed with HCl 1M, dried over anhydrous Na<sub>2</sub>SO<sub>4</sub>, and evaporated under reduced pressure. The crude was purified by column chromatography (hexane/EtOAc, 8/1) on silica gel affording **2a** (2.31 g, 58%) as a white-pale reddish solid:  $R_f$  0.44 (hexane/AcOEt, 6/1); mp 104–106 °C; <sup>1</sup>H NMR (300 MHz, CDCl<sub>3</sub>)  $\delta$  = 8.39 (br s, 1H), 8.05 (d,  $J$  = 8.3 Hz, 1H), 7.40 (td,  $J$  = 8.3, 2.1 Hz, 1H), 7.01–6.94 (m, 1H); <sup>13</sup>C NMR (75.4 MHz, CDCl<sub>3</sub>)  $\delta$  = 161.9 (d,  $J$  = 245.6 Hz, C), 155.0 (q,  $J$  = 37.7 Hz, C), 137.4 (d,  $J$  = 3.6 Hz, C), 130.9 (d,  $J$  = 8.9 Hz, CH), 117.5 (d,  $J$  = 3.1 Hz, CH), 115.7 (q,  $J$  = 288.5 Hz, C), 113.3 (d,  $J$  = 23.8 Hz, CH), 79.0 (d,  $J$  = 28.8 Hz, C); EI-LRMS  $m/z$  333 (M<sup>+</sup>, 53), 206 (100), 186 (26), 137 (13), 109 (22); IR (KBr) 3218, 3061, 1717, 1580, 1548, 1463, 1207, 1165, 788, 733 cm<sup>–1</sup>; HRMS calcd for C<sub>8</sub>H<sub>4</sub>F<sub>4</sub>INO, 332.9274; found, 332.9283.

### Synthesis of 4-fluoro-2-phenyl-1*H*-indole (3a) from 2a:

A mixture of **2a** (169 mg, 0.5 mmol), phenylacetylene (77 mg, 0.75 mmol), PdCl<sub>2</sub>(PPh<sub>3</sub>)<sub>2</sub> (10 mg, 3 mol%), CuI (5 mg, 5 mol%) and Et<sub>2</sub>NH (54 mg, 0.75 mmol) in anhydrous DMA (4 cm<sup>3</sup>) was heated for 4 h at 80 °C under a nitrogen atmosphere (cyclization was completed as monitored by GC-MS). CH<sub>2</sub>Cl<sub>2</sub> (20 cm<sup>3</sup>) and

water (20 cm<sup>3</sup>) were added to the cooled reaction mixture. The separated aqueous phase was extracted with CH<sub>2</sub>Cl<sub>2</sub> (2 × 20 cm<sup>3</sup>). The combined organic layers were washed with water (2 × 60 cm<sup>3</sup>). The organic layer was dried over Na<sub>2</sub>SO<sub>4</sub> and concentrated at reduced pressure. The remaining residue was purified by column chromatography (hexane/EtOAc, 8/1) on silica gel affording **3a** (92 mg, 87%) as a brown solid: *R<sub>f</sub>* 0.47 (hexane/AcOEt, 4/1); mp 62–64 °C (lit.<sup>3</sup> mp 65–67 °C); <sup>1</sup>H NMR (300 MHz, CDCl<sub>3</sub>) δ = 8.45 (br s, 1H), 7.70–7.63 (m, 2H), 7.51–7.43 (m, 2H), 7.41–7.33 (m, 1H), 7.21–7.09 (m, 2H), 6.93 (dd, *J* = 2.2, 0.7 Hz, 1H), 6.84 (ddd, *J* = 10.3, 7.4 1.2 Hz, 1H); <sup>13</sup>C NMR (75.4 MHz, CDCl<sub>3</sub>) δ = 156.5 (d, *J* = 246.8 Hz, C), 139.3 (d, *J* = 11.2 Hz, C), 138.0 (C), 131.9 (C), 129.2 (2 × CH), 128.1 (CH), 125.3 (2 × CH), 122.8 (d, *J* = 7.6 Hz, CH), 118.6 (d, *J* = 22.4 Hz, C), 107.1 (d, *J* = 3.6 Hz, CH), 105.1 (d, *J* = 18.9 Hz, CH), 95.8 (CH); HRMS calcd for C<sub>14</sub>H<sub>10</sub>FN, 211.0797; found, 211.0787.

#### General procedure for the synthesis of *O*-2,3-dihalophenyl *N,N*-diethylcarbamates **4**:<sup>4</sup>

*n*BuLi (8.25 cm<sup>3</sup> of a 1.6M solution in hexane, 13.2 mmol) was added to a solution of *i*Pr<sub>2</sub>NH (1.85 cm<sup>3</sup>, 13.2 mmol) in THF (40 cm<sup>3</sup>) at 0 °C. After 30 min at 0 °C, the LDA solution was cooled to –78 °C, and the corresponding 3-halophenyl *N,N*-diethylcarbamate (12 mmol) was added. The resulting solution was stirred for 30 min at –78 °C, and then iodine (3.66 g, 14.4 mmol) was added. After 30 min at low temperature, the reaction mixture was allowed to reach room temperature and quenched with saturated aqueous Na<sub>2</sub>S<sub>2</sub>O<sub>3</sub>. The aqueous phase was extracted with Et<sub>2</sub>O (3 × 30 cm<sup>3</sup>), and the combined organic layers were washed with HCl 1M, dried over anhydrous Na<sub>2</sub>SO<sub>4</sub>, and evaporated under reduced pressure. The crude was purified by column chromatography (hexane/EtOAc, 5/1) on silica gel affording the title compounds **4**, whose spectroscopic and characterization data have been previously reported.<sup>4</sup>

#### Procedure for the synthesis of 2,3-dihalophenyl ethers **5a** and **5b**:<sup>5</sup>

To a solution of lithium 2,2,6,6-tetramethylpiperidide (20 mmol, generated from *n*BuLi and 2,2,6,6-tetramethylpiperidine) in dry THF (30 cm<sup>3</sup>), a solution of *t*Bu<sub>2</sub>Zn (22 mmol, generated from *t*BuLi and ZnCl<sub>2</sub>) in dry THF (30 cm<sup>3</sup>) was added at –78 °C, and the reaction mixture was stirred at 0 °C for 30 min. Then, the corresponding 3-haloanisole (10 mmol) was added at –78 °C, the reaction mixture was allowed to reach –45 °C (for X = Cl) or –30 °C (for X = Br), and it was stirred at this temperature overnight. Iodine (17.78 g, 70 mmol) in THF (30 cm<sup>3</sup>) was added to the reaction mixture and it was stirred at room temperature for 2 h. The reaction was quenched with saturated Na<sub>2</sub>S<sub>2</sub>O<sub>3</sub>, and the aqueous solution was extracted with EtOAc (3 × 15 cm<sup>3</sup>). The combined organic layers were washed with water (2 × 30 cm<sup>3</sup>) and dried over anhydrous Na<sub>2</sub>SO<sub>4</sub>. The solvent was removed under reduced pressure and the residue was purified by column chromatography (hexane/EtOAc) to afford the 2,3-dihalophenylethers **5a** and **5b**.

**1-Chloro-2-iodo-3-methoxybenzene (5a)**: purification by column chromatography (hexane/EtOAc, 20/1) on silica gel afforded **5a** (2.23 g, 86%) as a white solid: *R<sub>f</sub>* 0.28 (hexane/AcOEt, 20/1); mp 52–54 °C (lit.<sup>6</sup> mp 53.5 °C); <sup>1</sup>H NMR (300 MHz, CDCl<sub>3</sub>) δ = 7.22 (t, *J* = 8.1 Hz, 1H), 7.08 (ddd, *J* = 8.1, 1.3, 0.5 Hz, 1H), 6.67 (dd, *J* = 8.1, 1.3 Hz, 1H), 3.87 (s, 3H); <sup>13</sup>C NMR (75.4 MHz, CDCl<sub>3</sub>) δ = 159.9 (C), 139.8 (C), 129.9 (CH),

121.9 (CH), 108.5 (CH), 91.3 (C), 56.9 (CH<sub>3</sub>); EI-LRMS  $m/z$  270 ( $M^+ + 2$ , 31), 268 ( $M^+$ , 100), 253 (23), 225 (12), 126 (24), 111 (11); HRMS calcd for C<sub>7</sub>H<sub>6</sub>ClIO, 267.9152; found, 267.9166.

**1-Bromo-2-iodo-3-methoxybenzene (5b):** purification by column chromatography (hexane/EtOAc, 20/1) on silica gel afforded **5b** (2.60 g, 83%) as a white solid:  $R_f$  0.25 (hexane/AcOEt, 20/1); mp 63–65 °C (lit.<sup>5b</sup> mp 62.5–64 °C); <sup>1</sup>H NMR (300 MHz, CDCl<sub>3</sub>)  $\delta$  = 7.26 (td,  $J$  = 8.0, 1.2 Hz, 1H), 7.18 (dt,  $J$  = 8.0, 1.2 Hz, 1H), 6.71 (dd,  $J$  = 8.0, 1.2 Hz, 1H), 3.87 (s, 3H); <sup>13</sup>C NMR (75.4 MHz, CDCl<sub>3</sub>)  $\delta$  = 160.1 (C), 131.2 (C), 130.2 (CH), 125.2 (CH), 108.9 (CH), 94.4 (C), 57.0 (CH<sub>3</sub>); EI-LRMS  $m/z$  314 ( $M^+ + 2$ , 100), 312 ( $M^+$ , 100), 299 (21), 297 (20), 172 (42), 170 (40); HRMS calcd for C<sub>7</sub>H<sub>6</sub>BrIO, 311.8647; found, 311.8635.

### General procedure for the synthesis of *N*-(2,3-dihalophenyl)-2-hidroxy-2-methylpropanamides **8** from **4**:

To a solution of the corresponding 2,3-dihalophenyl *N,N*-diethylcarbamate **4** (1 equiv) in EtOH (10 cm<sup>3</sup>/mmol) NaOH (10 equiv) was added, and the mixture was refluxed for 5–8 h (completion of the hydrolysis was monitored by GC-MS). After the mixture was cooled to room temperature, most of the EtOH was removed under reduced pressure and the residue was diluted with Et<sub>2</sub>O and water. The organic phase was rejected and then, the aqueous solution was carefully neutralized with a HCl 1M solution. The aqueous phase was extracted with Et<sub>2</sub>O (3 × 30 cm<sup>3</sup>), and the combined organic layers were washed with brine, dried over anhydrous Na<sub>2</sub>SO<sub>4</sub>, and evaporated under reduced pressure. Without further purification, the crude phenol **6** was dissolved in anhydrous DMF (2 cm<sup>3</sup>/mmol) under a nitrogen atmosphere and NaOH (3 equiv) was added to the mixture. After 1 h at room temperature, 2-bromo-2-methylpropanamide (3 equiv) was added and the reaction was stirred for 2 h at room temperature. After complete alkylation of **6** to the corresponding 2-(2,3-dihalophenoxy)-2-methylpropanamide **7** (monitored by GC-MS), NaOH (9 equiv) was added and the mixture was heated at 60 °C for 2 h. The reaction was quenched with H<sub>2</sub>O and the corresponding *N*-(2,3-dihalophenyl)-2-hidroxy-2-methylpropanamide **8** was recovered as a solid after filtration.

***N*-(3-Fluoro-2-iodophenyl)-2-hydroxy-2-methylpropanamide (8a):** Reaction of 3-fluoro-2-iodophenyl *N,N*-diethylcarbamate **4a** (674 mg, 2 mmol) according to the general procedure afforded **8a** (536 mg, 83%) as a white solid: mp 95–97 °C; <sup>1</sup>H NMR (300 MHz, CDCl<sub>3</sub>)  $\delta$  = 9.31 (br s, 1H), 8.13 (d,  $J$  = 8.3 Hz, 1H), 7.35–7.26 (m, 1H), 6.83 (t,  $J$  = 8.3 Hz, 1H), 2.71 (s, 1H), 1.58 (s, 6H); <sup>13</sup>C NMR (75.4 MHz, CDCl<sub>3</sub>)  $\delta$  = 175.0 (C), 161.8 (d,  $J$  = 243.7 Hz, C), 139.8 (d,  $J$  = 3.5 Hz, C), 130.5 (d,  $J$  = 9.0 Hz, CH), 116.5 (d,  $J$  = 2.9 Hz, CH), 111.2 (d,  $J$  = 23.8 Hz, CH), 78.1 (d,  $J$  = 27.9 Hz, C), 74.7 (C), 28.1 (2 × CH<sub>3</sub>); EI-LRMS  $m/z$  323 ( $M^+$ , 27), 265 (33), 237 (100), 138 (19), 59 (81); IR (KBr) 3420, 3368, 3289, 1661, 1462, 1416, 776 cm<sup>-1</sup>; HRMS calcd for C<sub>10</sub>H<sub>11</sub>FINO<sub>2</sub>, 322.9819; found, 322.9812.

***N*-(3-Chloro-2-iodophenyl)-2-hydroxy-2-methylpropanamide (8b):** Reaction of 3-chloro-2-iodophenyl *N,N*-diethylcarbamate **4b** (3.53 g, 10 mmol) according to the general procedure afforded **8b** (2.78 g, 82%) as a white solid: mp 113–115 °C; <sup>1</sup>H NMR (300 MHz, CDCl<sub>3</sub>)  $\delta$  = 9.33 (br s, 1H), 8.21 (dd,  $J$  = 7.8, 1.5 Hz, 1H), 7.31–7.21 (m, 2H), 2.47 (s, 1H), 1.58 (s, 6H); <sup>13</sup>C NMR (75.4 MHz, CDCl<sub>3</sub>)  $\delta$  = 175.0 (C), 140.4 (C), 139.1 (C), 129.8 (CH), 125.1 (CH), 118.9 (CH), 95.1 (C), 74.7 (C), 28.0 (2 × CH<sub>3</sub>); EI-LRMS  $m/z$  341 ( $M^+ + 2$ , 3),

339 ( $M^+$ , 8), 281 (10), 253 (62), 194 (15), 154 (24), 59 (100); IR (KBr) 3398, 3291, 1662, 1575, 1539, 1444, 1396, 1126, 776  $\text{cm}^{-1}$ ; HRMS calcd for  $\text{C}_{10}\text{H}_{11}\text{ClINO}_2$ , 338.9523; found, 338.9514.

***N*-(3-Bromo-2-iodophenyl)-2-hydroxy-2-methylpropanamide (8c):** Reaction of 3-bromo-2-iodophenyl *N,N*-diethylcarbamate **4c** (794 mg, 2 mmol) according to the general procedure afforded **8c** (620 mg, 81%) as a white solid: mp 118–120 °C;  $^1\text{H}$  NMR (300 MHz,  $\text{CDCl}_3$ )  $\delta$  = 9.33 (br s, 1H), 8.23 (dd,  $J$  = 8.1, 1.4 Hz, 1H), 7.4 (dd,  $J$  = 8.1, 1.4 Hz, 1H), 7.22 (t,  $J$  = 8.1 Hz, 1H), 2.55 (s, 1H), 1.57 (s, 6H);  $^{13}\text{C}$  NMR (75.4 MHz,  $\text{CDCl}_3$ )  $\delta$  = 174.9 (C), 140.5 (C), 130.4 (C), 130.1 (CH), 128.5 (CH), 119.4 (CH), 98.2 (C), 74.7 (C), 28.0 (2  $\times$   $\text{CH}_3$ ); EI-LRMS  $m/z$  385 ( $M^+$ +2, 3), 383 ( $M^+$ , 3), 325 (4), 299 (24), 297 (25), 240 (10), 238 (10), 200 (15), 198 (15), 59 (100); IR (KBr) 3387, 3285, 1652, 1651, 1525, 1392, 776, 693  $\text{cm}^{-1}$ ; HRMS calcd for  $\text{C}_{10}\text{H}_{11}\text{BrINO}_2$ , 382.9018; found, 382.9012.

***N*-(2,3-Diiodophenyl)-2-hydroxy-2-methylpropanamide (8d):** Reaction of 2,3-diiodophenyl *N,N*-diethylcarbamate **4d** (890 mg, 2 mmol) according to the general procedure afforded **8d** (680 mg, 79%) as a white solid: mp 144–146 °C;  $^1\text{H}$  NMR (300 MHz,  $\text{CDCl}_3$ )  $\delta$  = 9.28 (br s, 1H), 8.24 (dd,  $J$  = 8.2, 1.4 Hz, 1H), 7.67 (dd,  $J$  = 7.8, 1.4 Hz, 1H), 7.09 (t app,  $J$  = 8.0 Hz, 1H), 2.53 (br s, 1H), 1.57 (s, 6H);  $^{13}\text{C}$  NMR (75.4 MHz,  $\text{CDCl}_3$ )  $\delta$  = 175.1 (C), 140.0 (C), 135.4 (CH), 130.4 (CH), 120.2 (CH), 108.8 (C), 104.5 (C), 74.5 (C), 28.0 (2  $\times$   $\text{CH}_3$ ); EI-LRMS  $m/z$  431 ( $M^+$ , 21), 372 (8), 345 (85), 286 (62), 246 (44), 218 (14), 91 (15), 59 (100); IR (KBr) 3318, 1651, 1568, 1523, 1386, 773  $\text{cm}^{-1}$ ; HRMS calcd for  $\text{C}_{10}\text{H}_{11}\text{I}_2\text{NO}_2$ , 430.8879; found, 430.8873.

### General procedure for the synthesis of *N*-(2,3-dihalophenyl)-2-hydroxy-2-methylpropanamides **8** from **5**:

$\text{BBr}_3$  (20  $\text{cm}^3$  of a 1M solution in  $\text{CH}_2\text{Cl}_2$ , 20 mmol) was added dropwise to a solution of the corresponding anisole **7** (4 mmol) in  $\text{CH}_2\text{Cl}_2$  (120  $\text{cm}^3$ ) at  $-78$  °C.<sup>7</sup> The mixture was allowed to reach room temperature overnight, and then  $\text{NaHCO}_3$  (1.68 g, 20 mmol) was added. The resulting mixture was cooled to 0 °C, and MeOH (70  $\text{cm}^3$ ) was added dropwise. After 30 min at 0 °C, the mixture was warmed to room temperature and stirred for 1 h. Most of the solvent was removed under reduced pressure and the residue was diluted with water and  $\text{CH}_2\text{Cl}_2$ . The separated aqueous phase was extracted with  $\text{CH}_2\text{Cl}_2$  (2  $\times$  30  $\text{cm}^3$ ). The combined organic layers were dried over anhydrous  $\text{Na}_2\text{SO}_4$  and concentrated under reduced pressure. Without further purification, the corresponding crude dihalophenol **6** was dissolved in anhydrous DMF (8  $\text{cm}^3$ ) under a nitrogen atmosphere and NaOH (480 mg, 12 mmol) was added to the mixture. After 1 h at room temperature, 2-bromo-2-methylpropanamide (1.99 g, 12 mmol) was added and the reaction was stirred for 2 h at room temperature. After complete alkylation of **6** to the corresponding 2-(2,3-dihalophenoxy)-2-methylpropanamide **7** (monitored by GC-MS), NaOH (9 equiv) was added and the mixture was heated at 60 °C for 2 h. The reaction was quenched with  $\text{H}_2\text{O}$  and the corresponding *N*-(2,3-dihalophenyl)-2-hydroxy-2-methylpropanamide **8** was recovered as a solid after filtration.

## General procedure for the synthesis of 2-alkynyl-3-haloanilides **9** and **10**:

A mixture of the corresponding *N*-(2,3-dihalophenyl)propanamide **8b** or **8c** (1 mmol), alkyne (1.5 mmol), PdCl<sub>2</sub>(PPh<sub>3</sub>)<sub>2</sub> (21 mg, 0.03 mmol), CuI (9.5 mg, 0.05 mmol) and Et<sub>2</sub>NH (110 mg, 1.5 mmol) in anhydrous DMF (4 cm<sup>3</sup>) was stirred under a nitrogen atmosphere at 40, 50 or 80 °C for the desired time until complete consumption of starting material as monitored by GC-MS (2–6 h). CH<sub>2</sub>Cl<sub>2</sub> (20 cm<sup>3</sup>) and aq HCl (20 cm<sup>3</sup> of a 0.5M solution) were added to the cooled reaction mixture. The separated aqueous phase was extracted with CH<sub>2</sub>Cl<sub>2</sub> (2 × 20 cm<sup>3</sup>). The combined organic layers were washed with water (2 × 60 cm<sup>3</sup>). The organic layer was dried over Na<sub>2</sub>SO<sub>4</sub> and concentrated at reduced pressure. The remaining residue was purified by column chromatography on silica gel (hexane/EtOAc, 5/1) to afford the coupled products.

***N*-(3-Chloro-2-(2-phenylethynyl)phenyl)-2-hydroxy-2-methylpropanamide (9a):** Reaction of **8b** (339 mg, 1 mmol) with phenylacetylene (153 mg, 1.5 mmol) for 2 h at 80 °C, according to the general procedure, afforded **9a** (268 mg, 86%) as a white solid: *R<sub>f</sub>* 0.36 (hexane/AcOEt, 4/1); mp 139–141 °C; <sup>1</sup>H NMR (300 MHz, CDCl<sub>3</sub>) δ = 9.83 (br s, 1H), 8.42 (dd, *J* = 8.2, 1.1 Hz, 1H), 7.65–7.57 (m, 2H), 7.40–7.34 (m, 3H), 7.24 (t, *J* = 8.2 Hz, 1H), 7.15 (dd, *J* = 8.2, 1.1 Hz, 1H), 2.35 (br s, 1H), 1.58 (s, 6H); <sup>13</sup>C NMR (75.4 MHz, CDCl<sub>3</sub>) δ = 174.7 (C), 140.2 (C), 135.7 (C), 131.8 (2 × CH), 129.9 (CH), 129.2 (CH), 128.7 (2 × CH), 124.2 (CH), 122.4 (C), 116.8 (CH), 112.9 (C), 101.7 (C), 81.6 (C), 74.8 (C), 28.1 (2 × CH<sub>3</sub>) EI-LRMS *m/z* 315 (M<sup>+</sup>+2, 17), 313 (M<sup>+</sup>, 51), 254 (54), 229 (33), 227 (100), 190 (27), 59 (41); IR (KBr) 3365, 3321, 1665, 1571, 1534, 1452, 759, 692 cm<sup>-1</sup>; HRMS calcd for C<sub>18</sub>H<sub>16</sub>ClNO<sub>2</sub>, 313.0870; found, 313.0857.

***N*-(3-Chloro-2-(hex-1-ynyl)phenyl)-2-hydroxy-2-methylpropanamide (9b):** Reaction of **8b** (339 mg, 1 mmol) with 1-hexyne (123 mg, 1.5 mmol) for 2.5 h at 80 °C, according to the general procedure, afforded **9b** (264 mg, 90%) as a pale brown solid: *R<sub>f</sub>* 0.26 (hexane/AcOEt, 5/1); mp 66–68 °C; <sup>1</sup>H NMR (300 MHz, CDCl<sub>3</sub>) δ = 9.65 (br s, 1H), 8.37 (d, *J* = 8.1 Hz, 1H), 7.24–7.07 (m, 2H), 2.55 (t, *J* = 6.9 Hz, 2H), 2.45 (br s, 1H), 1.70–1.46 (m, 4H), 1.56 (s, 6H), 0.95 (t, *J* = 7.1 Hz, 3H); <sup>13</sup>C NMR (75.4 MHz, CDCl<sub>3</sub>) δ = 174.8 (C), 140.2 (C), 135.6 (C), 129.0 (CH), 124.1 (CH), 116.7 (CH), 113.5 (C), 103.7 (C), 74.5 (C), 73.1 (C), 30.7 (CH<sub>2</sub>), 28.1 (2 × CH<sub>3</sub>), 22.1 (CH<sub>2</sub>), 19.6 (CH<sub>2</sub>), 13.7 (CH<sub>3</sub>); EI-LRMS *m/z* 295 (M<sup>+</sup>+2, 17), 293 (M<sup>+</sup>; 51), 207 (48), 193 (41), 178 (64), 164 (88), 59 (100); IR (KBr) 3419, 3322, 1670, 1572, 1516, 1450, 981 cm<sup>-1</sup>; HRMS calcd for C<sub>16</sub>H<sub>20</sub>ClNO<sub>2</sub>, 293.1183; found, 293.1184.

***N*-(3-Chloro-2-(hept-1-ynyl)phenyl)-2-hydroxy-2-methylpropanamide (9c):** Reaction of **8b** (339 mg, 1 mmol) with 1-heptyne (144 mg, 1.5 mmol) for 2.5 h at 80 °C, according to the general procedure, afforded **9c** (249 mg, 81%) as a pale brown solid: *R<sub>f</sub>* 0.35 (hexane/AcOEt, 4/1); mp 76–78 °C; <sup>1</sup>H NMR (300 MHz, CDCl<sub>3</sub>) δ 9.77 (br s, 1H), 8.32 (dd, *J* = 7.6, 1.8 Hz, 1H), 7.15–7.05 (m, 2H), 3.49 (s, 1H), 2.49 (t, *J* = 7.1 Hz, 2H), 1.68–1.56 (m, 2H), 1.53 (s, 6H), 1.47–1.21 (m, 4H), 0.88 (t, *J* = 7.1 Hz, 3H); <sup>13</sup>C NMR (75.4 MHz, CDCl<sub>3</sub>) δ 175.3 (C), 140.0 (C), 135.6 (C), 128.8 (CH), 124.0 (CH), 116.6 (CH), 113.6 (C), 103.8 (C), 74.2 (C), 73.0 (C), 31.1 (CH<sub>2</sub>), 28.2 (CH<sub>2</sub>), 27.9 (2 × CH<sub>3</sub>), 22.2 (CH<sub>2</sub>), 19.7 (CH<sub>2</sub>), 14.0 (CH<sub>3</sub>); EI-LRMS *m/z* 309 (M<sup>+</sup>+2, 7), 307 (M<sup>+</sup>, 21), 206 (20), 180 (35), 164 (44), 59 (100); IR (KBr) 3311, 2953, 1662, 1569, 1520, 1453, 1139, 790, 731 cm<sup>-1</sup>; HRMS calcd for C<sub>17</sub>H<sub>22</sub>ClNO<sub>2</sub>, 307.1339; found, 307.1342.

***N*-(3-Chloro-2-(2-cyclohexenylethynyl)phenyl)-2-hydroxy-2-methylpropanamide (9d):** Reaction of **8b** (339 mg, 1 mmol) with 1-ethynylcyclohexene (159 mg, 1.5 mmol) for 3 h at 80 °C, according to the general procedure, afforded **9d** (254 mg, 80%) as a white solid:  $R_f$  0.34 (hexane/AcOEt, 5/1); mp 145–147 °C;  $^1\text{H}$  NMR (300 MHz,  $\text{CDCl}_3$ )  $\delta$  = 9.67 (br s, 1H), 8.36 (dd,  $J$  = 8.1, 1.3 Hz, 1H), 7.17 (t,  $J$  = 8.1 Hz, 1H), 7.10 (dd,  $J$  = 8.1, 1.3 Hz, 1H), 6.36–6.30 (m, 1H), 2.80 (s, 1H), 2.30–2.22 (m, 2H), 2.18–2.10 (m, 2H), 1.72–1.57 (m, 4H), 1.55 (s, 6H);  $^{13}\text{C}$  NMR (75.4 MHz,  $\text{CDCl}_3$ )  $\delta$  = 174.9 (C), 139.7 (C), 137.0 (CH), 135.4 (C), 129.2 (CH), 124.1 (CH), 120.3 (C), 116.6 (CH), 113.4 (C), 103.8 (C), 79.0 (C), 74.5 (C), 29.0 ( $\text{CH}_2$ ), 28.0 ( $2 \times \text{CH}_3$ ), 26.0 ( $\text{CH}_2$ ), 22.3 ( $\text{CH}_2$ ), 21.5 ( $\text{CH}_2$ ); EI-LRMS  $m/z$  319 ( $\text{M}^+ + 2$ , 23), 317 ( $\text{M}^+$ , 72), 281 (25), 231 (57), 207 (100), 180 (26), 59 (55); IR (KBr) 3372, 3320, 1652, 1572, 1532, 1450, 1435, 1197, 1184, 778, 725  $\text{cm}^{-1}$ ; HRMS calcd for  $\text{C}_{18}\text{H}_{20}\text{ClNO}_2$ , 317.1183; found, 317.1190.

***N*-(3-Chloro-2-(2-(trimethylsilyl)ethynyl)phenyl)-2-hydroxy-2-methylpropanamide (9e):** Reaction of **8b** (339 mg, 1 mmol) with trimethylsilylacetylene (147 mg, 1.5 mmol) for 5.5 h at 40 °C, according to the general procedure, afforded **9e** (251 mg, 81%) as a pale brown solid:  $R_f$  0.47 (hexane/AcOEt, 4/1); mp 144–146 °C;  $^1\text{H}$  NMR (300 MHz,  $\text{CDCl}_3$ )  $\delta$  = 9.66 (br s, 1H), 8.37 (dd,  $J$  = 8.3, 0.9 Hz, 1H), 7.21 (t,  $J$  = 8.3 Hz, 1H), 7.09 (dd,  $J$  = 8.3, 0.9 Hz, 1H), 2.60 (br s, 1H), 1.55 (s, 6H), 0.29 (d,  $J$  = 0.9 Hz, 9H);  $^{13}\text{C}$  NMR (75.4 MHz,  $\text{CDCl}_3$ )  $\delta$  = 175.0 (C), 140.8 (C), 135.8 (C), 130.0 (CH), 124.1 (CH), 116.8 (CH), 112.8 (C), 108.1 (C), 96.6 (C), 74.6 (C), 28.1 ( $2 \times \text{CH}_3$ ), 0.0 ( $3 \times \text{CH}_3$ ); EI-LRMS  $m/z$  311 ( $\text{M}^+ + 2$ , 10), 309 ( $\text{M}^+$ , 29), 236 (100), 208 (39); HRMS calcd for  $\text{C}_{15}\text{H}_{20}\text{ClNO}_2\text{Si}$ , 309.0952; found, 309.0951.

***N*-(3-Bromo-2-(2-phenylethynyl)phenyl)-2-hydroxy-2-methylpropanamide (10a):** Reaction of **8c** (383 mg, 1 mmol) with 1-phenylacetylene (153 mg, 1.5 mmol) for 3.5 h at 50 °C, according to the general procedure, afforded **10a** (286 mg, 80%) as a white solid:  $R_f$  0.32 (hexane/AcOEt, 4/1); mp 131–133 °C;  $^1\text{H}$  NMR (300 MHz,  $\text{CDCl}_3$ )  $\delta$  = 9.86 (br s, 1H), 8.44 (dd,  $J$  = 8.2, 1.0 Hz, 1H), 7.63–7.58 (m, 2H), 7.38–7.29 (m, 4H), 7.13 (t,  $J$  = 8.2 Hz, 1H), 2.87 (s, 1H), 1.55 (s, 6H);  $^{13}\text{C}$  NMR (75.4 MHz,  $\text{CDCl}_3$ )  $\delta$  = 175.0 (C), 140.1 (C), 131.7 ( $2 \times \text{CH}$ ), 130.1 (CH), 129.2 (CH), 128.6 ( $2 \times \text{CH}$ ), 127.3 (CH), 125.0 (C), 122.3 (C), 117.3 (CH), 115.0 (C), 101.1 (C), 83.4 (C), 74.7 (C), 28.0 ( $2 \times \text{CH}_3$ ); EI-LRMS  $m/z$  359 ( $\text{M}^+ + 2$ , 62), 357 ( $\text{M}^+$ , 62), 300 (60), 298 (58), 273 (100), 271 (100), 191 (60), 165 (53), 59 (83); IR (KBr) 3372, 3312, 1661, 1566, 1532, 1446, 1200, 1131, 752, 726, 689  $\text{cm}^{-1}$ ; HRMS calcd for  $\text{C}_{18}\text{H}_{16}\text{BrNO}_2$ , 357.0364; found, 357.0368.

***N*-(3-Bromo-2-(hex-1-ynyl)phenyl)-2-hydroxy-2-methylpropanamide (10b):** Reaction of **8c** (383 mg, 1 mmol) with 1-hexyne (123 mg, 1.5 mmol) for 3.5 h at 50 °C, according to the general procedure, afforded **10b** (431 mg, 85%) as a pale brown solid:  $R_f$  0.31 (hexane/AcOEt, 4/1); mp 70–72 °C;  $^1\text{H}$  NMR (300 MHz,  $\text{CDCl}_3$ )  $\delta$  = 9.76 (br s, 1H), 8.36 (dd,  $J$  = 8.2, 1.0 Hz, 1H), 7.25 (dd,  $J$  = 8.2, 1.0 Hz, 1H), 7.05 (t,  $J$  = 8.2 Hz, 1H), 3.42 (s, 1H), 2.50 (t,  $J$  = 7.0 Hz, 2H), 1.64–1.43 (m, 4H), 1.52 (s, 6H), 0.91 (t,  $J$  = 7.2 Hz, 3H);  $^{13}\text{C}$  NMR (75.4 MHz,  $\text{CDCl}_3$ )  $\delta$  = 175.3 (C), 140.1 (C), 129.2 (CH), 127.2 (CH), 125.0 (C), 117.1 (CH), 115.6 (C), 103.1 (C), 74.8 (C), 74.2 (C), 30.5 ( $\text{CH}_2$ ), 27.9 ( $2 \times \text{CH}_3$ ), 22.1 ( $\text{CH}_2$ ), 19.5 ( $\text{CH}_2$ ), 13.7 ( $\text{CH}_3$ ); EI-LRMS  $m/z$  339 ( $\text{M}^+ + 2$ , 37), 337 ( $\text{M}^+$ , 36), 253 (29), 251 (30), 226 (50), 210 (51), 157 (25), 129 (26), 59 (100); IR (KBr) 3419, 3319, 1673, 1567, 1520, 1427, 980, 729  $\text{cm}^{-1}$ ; HRMS calcd for  $\text{C}_{16}\text{H}_{20}\text{BrNO}_2$ , 337.0677; found, 337.0676.

***N*-(3-Bromo-2-(hept-1-ynyl)phenyl)-2-hydroxy-2-methylpropanamide (10c):** Reaction of **8c** (383 mg, 1 mmol) with 1-heptyne (144 mg, 1.5 mmol) for 3.5 h at 50 °C, according to the general procedure, afforded

**10c** (277 mg, 79%) as a white solid:  $R_f$  0.30 (hexane/AcOEt, 4/1); mp 79–81 °C;  $^1\text{H}$  NMR (300 MHz,  $\text{CDCl}_3$ )  $\delta$  9.78 (s, 1H), 8.35 (dd,  $J$  = 8.2, 0.8 Hz, 1H), 7.24 (dd,  $J$  = 8.2, 0.8 Hz, 1H), 7.03 (t,  $J$  = 8.2 Hz, 1H), 3.58 (s, 1H), 2.47 (t,  $J$  = 7.2 Hz, 2H), 1.68–1.57 (m, 2H), 1.52 (s, 6H), 1.49–1.24 (m, 4H), 0.87 (t,  $J$  = 7.2 Hz, 3H);  $^{13}\text{C}$  NMR (75.4 MHz,  $\text{CDCl}_3$ )  $\delta$  175.4 (C), 140.1 (C), 129.1 (CH), 127.1 (CH), 125.0 (C), 117.1 (CH), 115.6 (C), 103.2 (C), 74.8 (C), 74.2 (C), 31.1 ( $\text{CH}_2$ ), 28.2 ( $\text{CH}_2$ ), 27.8 ( $2 \times \text{CH}_3$ ), 22.2 ( $\text{CH}_2$ ), 19.7 ( $\text{CH}_2$ ), 14.0 ( $\text{CH}_3$ ); EI-LRMS  $m/z$  353 ( $\text{M}^+ + 2$ , 15), 351 ( $\text{M}^+$ , 15), 226 (28), 210 (30), 157 (21), 59 (100); IR (KBr) 3295, 2930, 1661, 1564, 1520, 1449, 1130, 981, 788, 730  $\text{cm}^{-1}$ ; HRMS calcd for  $\text{C}_{17}\text{H}_{22}\text{BrNO}_2$ , 351.0834; found, 351.0822.

***N*-(3-bromo-2-(2-cyclohexenylethynyl)phenyl)-2-hydroxy-2-methylpropanamide (10d)**: Reaction of **8c** (383 mg, 1 mmol) with 1-ethynylcyclohexene (159 mg, 1.5 mmol) for 5 h at 50 °C, according to the general procedure, afforded **10d** (310 mg, 86%) as a white solid:  $R_f$  0.32 (hexane/AcOEt, 4/1); mp 154–156 °C;  $^1\text{H}$  NMR (300 MHz,  $\text{CDCl}_3$ )  $\delta$  = 9.65 (br s, 1H), 8.42 (dd,  $J$  = 8.2, 1.1 Hz, 1H), 7.29 (dd,  $J$  = 8.2 Hz, 1.1 Hz, 1H), 7.12 (t,  $J$  = 8.2 Hz, 1H), 6.37–6.32 (m, 1H), 2.48 (br s, 1H), 2.32–2.22 (m, 2H), 2.21–2.12 (m, 2H), 1.77–1.58 (m, 4H), 1.56 (s, 6H);  $^{13}\text{C}$  NMR (75.4 MHz,  $\text{CDCl}_3$ )  $\delta$  = 174.8 (C), 139.9 (C), 137.1 (CH), 129.6 (CH), 127.2 (CH), 124.9 (C), 120.4 (C), 117.2 (CH), 115.4 (C), 103.2 (C), 80.9 (C), 74.6 (C), 28.9 ( $\text{CH}_2$ ), 28.1 ( $2 \times \text{CH}_3$ ), 26.0 ( $\text{CH}_2$ ), 22.3 ( $\text{CH}_2$ ), 21.5 ( $\text{CH}_2$ ); EI-LRMS  $m/z$  363 ( $\text{M}^+ + 2$ , 100), 361 ( $\text{M}^+$ , 100), 277 (53), 275 (53), 167 (34), 59 (63); IR (KBr) 3376, 3318, 2929, 1653, 1566, 1530, 1446, 1433, 976, 775, 724  $\text{cm}^{-1}$ ; HRMS calcd for  $\text{C}_{18}\text{H}_{20}\text{BrNO}_2$ , 361.0677; found, 361.0677.

***N*-(3-Bromo-2-(2-(trimethylsilyl)ethynyl)phenyl)-2-hydroxy-2-methylpropanamide (10e)**: Reaction of **8c** (383 mg, 1 mmol) with trimethylsilylacetylene (147 mg, 1.5 mmol) for 3 h at 40 °C, according to the general procedure, and afforded **10e** (251 mg, 71%) as a pale brown solid:  $R_f$  0.39 (hexane/AcOEt, 4/1); mp 150–152 °C;  $^1\text{H}$  NMR (300 MHz,  $\text{CDCl}_3$ )  $\delta$  = 9.70 (br s, 1H), 8.40 (dt,  $J$  = 8.2, 0.9 Hz, 1H), 7.27 (td,  $J$  = 8.2, 0.9 Hz, 1H), 7.12 (t,  $J$  = 8.2 Hz, 1H), 2.83 (s, 1H), 1.54 (d,  $J$  = 0.6 Hz, 6H), 0.28 (d,  $J$  = 0.8 Hz, 9H);  $^{13}\text{C}$  NMR (75.4 MHz,  $\text{CDCl}_3$ )  $\delta$  = 175.1 (C), 140.8 (C), 130.3 (CH), 127.2 (CH), 125.0 (C), 117.3 (CH), 114.8 (C), 107.5 (C), 98.3 (C), 74.4 (C), 28.0 ( $2 \times \text{CH}_3$ ), -0.1 ( $3 \times \text{CH}_3$ ); EI-LRMS  $m/z$  355 ( $\text{M}^+ + 2$ , 28), 353 ( $\text{M}^+$ , 27), 282 (100), 280 (100), 254 (37), 252 (37), 238 (19), 236 (18); HRMS calcd for  $\text{C}_{15}\text{H}_{20}\text{BrNO}_2\text{Si}$ , 353.0447; found, 353.0450.

***N*-(3-Bromo-2-(2-(thiophen-3-yl)ethynyl)phenyl)-2-hydroxy-2-methylpropanamide (10f)**: Reaction of **8c** (383 mg, 1 mmol) with 3-ethynylthiophene (162 mg, 1.5 mmol) for 3.5 h at 50 °C, according to the general procedure, afforded **10f** (269 mg, 74%) as a white solid:  $R_f$  0.37 (hexane/AcOEt, 4/1); mp 132–134 °C;  $^1\text{H}$  NMR (400 MHz,  $\text{CDCl}_3$ )  $\delta$  = 9.82 (br s, 1H), 8.41 (d,  $J$  = 8.3 Hz, 1H), 7.63 (dd,  $J$  = 2.9, 1.1 Hz, 1H), 7.31–7.27 (m, 2H), 7.24 (dd,  $J$  = 4.9, 1.1 Hz, 1H), 7.11 (t,  $J$  = 8.3 Hz, 1H), 2.90 (s, 1H), 1.53 (s, 6H);  $^{13}\text{C}$  NMR (100.8 MHz,  $\text{CDCl}_3$ )  $\delta$  = 175.0 (C), 140.1 (C), 130.0 (CH), 129.9 (CH), 129.8 (CH), 127.3 (CH), 125.9 (CH), 124.7 (C), 121.4 (C), 117.3 (CH), 115.1 (C), 96.3 (C), 83.1 (C), 74.7 (C), 28.0 ( $2 \times \text{CH}_3$ ); EI-LRMS  $m/z$  365 ( $\text{M}^+ + 2$ , 40), 363 ( $\text{M}^+$ , 44), 305 (19), 279 (61), 277 (59), 226 (14), 198 (29), 196 (32), 171 (23), 59 (100); HRMS calcd for  $\text{C}_{16}\text{H}_{14}\text{BrNO}_2\text{S}$ , 362.9929; found, 362.9928.



### General procedure for the synthesis of 4-halo-1*H*-indoles **11** and **12** from anilides **9** and **10**:

To a solution of the corresponding 2-alkynyl-3-haloanilide **9** or **10** (1 equiv) in anhydrous DMF (4 cm<sup>3</sup>/mmol) freshly powdered NaOH (3 equiv) was added. The resulting mixture was refluxed under a nitrogen atmosphere at 140 °C until the cyclization was completed (as monitored by GC-MS). CH<sub>2</sub>Cl<sub>2</sub> (10 cm<sup>3</sup>) and aq HCl (10 cm<sup>3</sup> of a 0.5M solution) were added to the cooled reaction mixture. The separated aqueous phase was extracted with CH<sub>2</sub>Cl<sub>2</sub> (2 × 10 cm<sup>3</sup>). The combined organic layers were washed with water (2 × 30 cm<sup>3</sup>), dried over anhydrous Na<sub>2</sub>SO<sub>4</sub> and concentrated under reduced pressure. The remaining residue was purified by column chromatography on silica gel (hexane/EtOAc) to afford the corresponding 4-haloindole **11** or **12**.

**4-Chloro-2-phenyl-1*H*-indole (11a):** From **9a** (94 mg, 0.3 mmol) and NaOH (36 mg, 0.9 mmol) according to the general procedure (4 h), and purification by column chromatography (hexane/EtOAc, 7/1) on silica gel afforded **11a** (54 mg, 79%) as a white solid: *R*<sub>f</sub> 0.32 (hexane/AcOEt, 6/1); mp 73–75 °C (lit.<sup>8</sup> mp 74–77 °C); <sup>1</sup>H NMR (300 MHz, CDCl<sub>3</sub>) δ = 8.43 (br s, 1H), 7.70–7.63 (m, 2H), 7.50–7.43 (m, 2H), 7.39–7.33 (m, 1H), 7.31–7.27 (m, 1H), 7.17–7.08 (m, 2H), 6.94 (dd, *J* = 2.2, 0.8 Hz, 1H); <sup>13</sup>C NMR (75.4 MHz, CDCl<sub>3</sub>) δ = 138.6 (C), 137.4 (C), 131.8 (C), 129.2 (2 × CH), 128.3 (CH), 128.2 (C), 125.9 (C), 125.4 (2 × CH), 122.9 (CH), 120.1 (CH), 109.6 (CH), 98.5 (CH); EI-LRMS *m/z* 229 (M<sup>+</sup>+2, 33), 227 (M<sup>+</sup>, 100), 191 (10), 165 (16), 113 (10); IR (KBr) 3449, 2961, 2924, 1452, 1261, 1098, 803, 756, 688 cm<sup>-1</sup>; HRMS calcd for C<sub>14</sub>H<sub>10</sub>ClN, 227.0502; found, 227.0501.

**2-Butyl-4-chloro-1*H*-indole (11b):** From **9b** (88 mg, 0.3 mmol) and NaOH (36 mg, 0.9 mmol) according to the general procedure (2.5 h), and purification by column chromatography (hexane/EtOAc, 8/1) on silica gel afforded **11b** (53 mg, 86%) as a colourless oil: *R*<sub>f</sub> 0.46 (hexane/EtOAc, 6/1); <sup>1</sup>H NMR (300 MHz, CDCl<sub>3</sub>) δ = 7.90 (br s, 1H), 7.18 (dt, *J* = 7.7, 1.0 Hz, 1H), 7.12 (dd, *J* = 7.6, 1.1 Hz, 1H), 7.05 (t, *J* = 7.7 Hz, 1H), 6.38 (dd, *J* = 2.2, 0.9 Hz, 1H), 2.74 (t, *J* = 7.6 Hz, 2H), 1.77–1.66 (m, 2H), 1.51–1.38 (m, 2H), 0.99 (t, *J* = 7.3, 3H); <sup>13</sup>C NMR (75.4 MHz, CDCl<sub>3</sub>) δ = 141.0 (C), 136.5 (C), 127.6 (C), 125.0 (C), 121.6 (CH), 119.4 (CH), 109.1 (CH), 98.1 (CH), 31.2 (CH<sub>2</sub>), 28.0 (CH<sub>2</sub>), 22.5 (CH<sub>2</sub>), 14.0 (CH<sub>3</sub>); EI-LRMS *m/z* 209 (M<sup>+</sup>+2, 10), 207 (M<sup>+</sup>, 33), 164 (100), 128 (8), 101 (6); IR (KBr) 3417, 2957, 2929, 1575, 1548, 1433, 1330, 1182, 941, 765 cm<sup>-1</sup>; HRMS calcd for C<sub>12</sub>H<sub>14</sub>ClN, 207.0815; found, 207.0822.

**4-Chloro-2-pentyl-1*H*-indole (11c):** From **9c** (154 mg, 0.5 mmol) and NaOH (60 mg, 1.5 mmol) according to the general procedure (2.5 h) and purification by column chromatography (hexane/EtOAc, 7/1) on silica gel afforded **11c** (93 mg, 84%) as a pale brown solid: *R*<sub>f</sub> 0.46 (hexane/AcOEt, 5/1); mp 24–26 °C; <sup>1</sup>H NMR (300 MHz, CDCl<sub>3</sub>) δ = 7.96 (br s, 1H), 7.19 (dd, *J* = 7.6, 0.9 Hz, 1H), 7.11–7.00 (m, 2H), 6.36 (d, *J* = 0.9 Hz, 1H), 2.75 (t, *J* = 7.6 Hz, 2H), 1.79–1.68 (m, 2H), 1.43–1.25 (m, 4H), 0.93 (t, *J* = 6.7 Hz, 3H); <sup>13</sup>C NMR (75.4 MHz, CDCl<sub>3</sub>) δ = 141.0 (C), 136.5 (C), 127.7 (C), 125.0 (C), 121.6 (CH), 119.4 (CH), 109.0 (CH), 98.1 (CH), 31.6 (CH<sub>2</sub>), 28.8 (CH<sub>2</sub>), 28.3 (CH<sub>2</sub>), 22.6 (CH<sub>2</sub>), 14.1 (CH<sub>3</sub>); EI-LRMS *m/z* 223 (M<sup>+</sup>+2 11), 221, (M<sup>+</sup>, 34), 178 (24), 164 (100), 128 (9), 101 (6); IR (KBr) 3417, 2956, 2928, 1547, 1433, 1329, 1182, 939, 765 cm<sup>-1</sup>; HRMS calcd for C<sub>13</sub>H<sub>16</sub>ClN, 221.0971; found, 221.0980.

**4-Chloro-2-cyclohexenyl-1*H*-indole (11d):** From **9d** (94 mg, 0.3 mmol) and NaOH (36 mg, 0.9 mmol) according to the general procedure (2.5 h), and purification by column chromatography (hexane/EtOAc, 8/1) on silica gel afforded **11d** (56 mg, 81%) as a pale brown oil: *R*<sub>f</sub> 0.70 (hexane/EtOAc, 6/1); <sup>1</sup>H NMR (300

MHz, CDCl<sub>3</sub>)  $\delta$  = 8.21 (br s, 1H), 7.21–7.17 (m, 1H), 7.09–7.02 (m, 2H), 6.54 (d,  $J$  = 2.0 Hz, 1H), 6.17–6.12 (m, 1H), 2.51–2.44 (m, 2H), 2.29–2.21 (m, 2H), 1.85–1.76 (m, 2H), 1.75–1.65 (m, 2H); <sup>13</sup>C NMR (75.4 MHz, CDCl<sub>3</sub>)  $\delta$  = 140.1 (C), 136.8 (C), 128.8 (C), 127.8 (C), 125.6 (C), 123.8 (CH), 122.5 (CH), 119.5 (CH), 109.1 (CH), 97.1 (CH), 26.0 (CH<sub>2</sub>), 25.6 (CH<sub>2</sub>), 22.5 (CH<sub>2</sub>), 22.2 (CH<sub>2</sub>); EI-LRMS  $m/z$  233 ( $M^+$ +2, 32), 231 ( $M^+$ , 100), 203 (35), 164 (34), 151 (29); IR (neat) 3433, 2928, 1569, 1432, 1334, 1184, 947, 764, 731 cm<sup>-1</sup>; HRMS calcd for C<sub>14</sub>H<sub>14</sub>ClN, 231.0815; found, 231.0814.

**4-Chloro-1H-indole (11e):**<sup>9</sup> From **9e** (168 mg, 0.5 mmol) and NaOH (60 mg, 1.5 mmol) according to the general procedure (4 h), and purification by flash column chromatography (hexane/EtOAc, 8/1) on silica gel afforded **11e** (55 mg, 73%) as a brown oil:  $R_f$  0.33 (hexane/AcOEt, 5/1); <sup>1</sup>H NMR (300 MHz, CDCl<sub>3</sub>)  $\delta$  = 8.25 (br s, 1H), 7.31–7.21 (m, 2H), 7.16–7.08 (m, 2H), 6.70–6.62 (m, 1H); <sup>13</sup>C NMR (75.4 MHz, CDCl<sub>3</sub>)  $\delta$  = 136.6 (C), 126.9 (C), 126.2 (C), 124.9 (CH), 122.7 (CH), 119.7 (CH), 109.8 (CH), 101.4 (CH); EI-LRMS  $m/z$  153 ( $M^+$ +2, 31), 151 ( $M^+$ , 100), 116 (18), 89 (27).

**4-Bromo-2-phenyl-1H-indole (12a):** From **10a** (178 mg, 0.5 mmol) and NaOH (60 mg, 1.5 mmol) according to the general procedure (5 h), and purification by flash column chromatography (hexane/EtOAc, 10/1) on silica gel afforded **12a** (113 mg, 83%) as a white solid:  $R_f$  0.38 (hexane/AcOEt, 5/1); mp 100–102 °C; <sup>1</sup>H NMR (300 MHz, CDCl<sub>3</sub>)  $\delta$  = 8.42 (br s, 1H), 7.65 (dd,  $J$  = 8.4, 1.0 Hz, 2H), 7.49–7.42 (m, 2H), 7.40–7.29 (m, 3H), 7.06 (t,  $J$  = 7.9 Hz, 1H), 6.91–6.89 (m, 1H); <sup>13</sup>C NMR (75.4 MHz, CDCl<sub>3</sub>)  $\delta$  = 138.5 (C), 137.0 (C), 131.7 (C), 130.1 (C), 129.2 (2 × CH), 128.3 (CH), 125.3 (2 × CH), 123.2 (CH), 114.6 (C), 110.2 (CH), 100.2 (CH); EI-LRMS  $m/z$  273 ( $M^+$ +2, 98), 271 ( $M^+$ , 100), 191 (27), 165 (34), 136 (11); IR (KBr) 3445, 1475, 1452, 1352, 1289, 1181, 916, 758, 691 cm<sup>-1</sup>; HRMS calcd for C<sub>14</sub>H<sub>10</sub>BrN, 270.9997; found, 270.9995.

**4-Bromo-2-butyl-1H-indole (12b):** From **10b** (101 mg, 0.3 mmol) and NaOH (36 mg, 0.9 mmol) according to the general procedure (3 h), and purification by column chromatography (hexane/EtOAc, 7/1) on silica gel afforded **12b** (61 mg, 80%) as a white solid:  $R_f$  0.45 (hexane/AcOEt, 5/1); mp 29–31 °C; <sup>1</sup>H NMR (300 MHz, CDCl<sub>3</sub>)  $\delta$  = 7.95 (br s, 1H), 7.26 (dd,  $J$  = 7.6, 0.8 Hz, 1H), 7.22 (dt,  $J$  = 8.0, 0.8 Hz, 1H), 6.99 (t,  $J$  = 7.8 Hz, 1H), 6.32 (dd,  $J$  = 2.2, 0.9 Hz, 1H), 2.74 (t,  $J$  = 7.6 Hz, 2H), 1.77–1.66 (m, 2H), 1.50–1.37 (m, 2H), 0.98 (t,  $J$  = 7.3 Hz, 3H); <sup>13</sup>C NMR (75.4 MHz, CDCl<sub>3</sub>)  $\delta$  = 141.0 (C), 136.0 (C), 129.6 (C), 122.5 (CH), 121.9 (CH), 113.7 (C), 109.6 (CH), 99.8 (CH), 31.2 (CH<sub>2</sub>), 28.0 (CH<sub>2</sub>), 22.5 (CH<sub>2</sub>), 14.0 (CH<sub>3</sub>); EI-LRMS  $m/z$  253 ( $M^+$ +2, 37), 251 ( $M^+$ , 37), 210 (100), 208 (98), 129 (32); IR (KBr) 3407, 2958, 2929, 1539, 1430, 1329, 1178, 917, 763, 729 cm<sup>-1</sup>; HRMS calcd for C<sub>12</sub>H<sub>14</sub>BrN, 251.0310; found, 251.0309.

**4-Bromo-2-pentyl-1H-indole (12c):** From **10c** (123 mg, 0.35 mmol) and NaOH (42 mg, 1.05 mmol) according to the general procedure (2.5 h) and purification by column chromatography (hexane/EtOAc, 7/1) on silica gel afforded **12c** (76 mg, 82%) as a pale brown oil:  $R_f$  0.42 (hexane/EtOAc, 6/1); <sup>1</sup>H NMR (300 MHz, CDCl<sub>3</sub>)  $\delta$  = 7.97 (br s, 1H), 7.28–7.20 (m, 2H), 6.98 (t,  $J$  = 8.0 Hz, 1H), 6.31 (dd,  $J$  = 2.2, 0.8 Hz, 1H), 2.74 (t,  $J$  = 7.7 Hz, 2H), 1.79–1.68 (m, 2H), 1.43–1.34 (m, 4H), 0.93 (t,  $J$  = 7.0 Hz, 3H); <sup>13</sup>C NMR (75.4 MHz, CDCl<sub>3</sub>)  $\delta$  = 141.0 (C), 136.1 (C), 129.6 (C), 122.5 (CH), 121.9 (CH), 113.7 (C), 109.6 (CH), 99.9 (CH), 31.6 (CH<sub>2</sub>), 28.9 (CH<sub>2</sub>), 28.3 (CH<sub>2</sub>), 22.6 (CH<sub>2</sub>), 14.1 (CH<sub>3</sub>); EI-LRMS  $m/z$  267 ( $M^+$ +2, 41), 265 ( $M^+$ , 42), 224

(19), 210 (100), 208 (98), 129 (32); IR (KBr) 3411, 2956, 2928, 1548, 1430, 1327, 1178, 917, 763  $\text{cm}^{-1}$ ; HRMS calcd for  $\text{C}_{13}\text{H}_{16}\text{BrN}$ , 265.0466; found, 265.0467

**4-Bromo-2-cyclohexenyl-1H-indole (12d):** From **10d** (180 mg, 0.5 mmol) and NaOH (60 mg, 1.5 mmol) according to the general procedure (4 h), and purification by flash column chromatography (hexane/EtOAc, 10/1) on silica gel afforded **12d** (105 mg, 76%) as a colourless oil:  $R_f$  0.50 (hexane/EtOAc, 6/1);  $^1\text{H}$  NMR (300 MHz,  $\text{CDCl}_3$ )  $\delta$  = 8.27 (br s, 1H), 7.27–7.20 (m, 2H), 6.99 (t,  $J$  = 7.8 Hz, 1H), 6.48 (d,  $J$  = 1.9 Hz, 1H), 6.17–6.12 (m, 1H), 2.51–2.43 (m, 2H), 2.28–2.20 (m, 2H), 1.84–1.75 (m, 2H), 1.75–1.65 (m, 2H);  $^{13}\text{C}$  NMR (75.4 MHz,  $\text{CDCl}_3$ )  $\delta$  = 140.2 (C), 136.4 (C), 129.7 (C), 128.9 (C), 123.8 (CH), 122.8 (CH), 122.7 (CH), 114.3 (C), 109.7 (CH), 98.9 (CH), 26.1 ( $\text{CH}_2$ ), 25.6 ( $\text{CH}_2$ ), 22.6 ( $\text{CH}_2$ ), 22.2 ( $\text{CH}_2$ ); EI-LRMS  $m/z$  277 ( $\text{M}^+ + 2$ , 98), 275 ( $\text{M}^+$ , 100), 247 (24), 195 (23), 167 (38); IR (KBr) 3427, 2927, 1568, 1524, 1429, 1332, 1179, 917, 762, 730  $\text{cm}^{-1}$ ; HRMS calcd for  $\text{C}_{14}\text{H}_{14}\text{BrN}$ , 275.0310; found, 275.0314.

**4-Bromo-1H-indole (12e):**<sup>9</sup> From **10e** (176 mg, 0.5 mmol) and NaOH (60 mg, 1.5 mmol) according to the general procedure (5 h), and purification by flash column chromatography (hexane/EtOAc, 10/1) on silica gel afforded **12e** (73 mg, 75%) as a colourless oil:  $R_f$  0.29 (hexane/EtOAc, 6/1);  $^1\text{H}$  NMR (300 MHz,  $\text{CDCl}_3$ )  $\delta$  = 8.28 (br s, 1H), 7.37–7.23 (m, 3H), 7.06 (t,  $J$  = 7.9 Hz, 1H), 6.64–6.60 (m, 1H);  $^{13}\text{C}$  NMR (75.4 MHz,  $\text{CDCl}_3$ )  $\delta$  = 136.1 (C), 128.8 (C), 124.8 (CH), 123.0 (CH), 122.9 (CH), 114.9 (C), 110.4 (CH), 103.2 (CH); EI-LRMS  $m/z$  197 ( $\text{M}^+ + 2$ , 100), 195 ( $\text{M}^+$ , 100), 184 (7), 116 (77), 89 (44); HRMS calcd for  $\text{C}_8\text{H}_6\text{BrN}$ , 194.9684; found, 194.9679.

**4-Bromo-2-(thiophen-3-yl)-1H-indole (12f):** From **10f** (181 mg, 0.5 mmol) and NaOH (60 mg, 1.5 mmol) according to the general procedure (3 h), and purification by flash column chromatography (hexane/EtOAc, 10/1) on silica gel afforded **12f** (99 mg, 71%) as a pale brown solid:  $R_f$  0.48 (hexane/AcOEt, 4/1); mp 44–46 °C;  $^1\text{H}$  NMR (300 MHz,  $\text{CDCl}_3$ )  $\delta$  = 8.35 (br s, 1H), 7.47–7.38 (m, 3H), 7.29 (d,  $J$  = 7.7 Hz, 2H), 7.07–7.00 (m, 1H), 6.75 (d,  $J$  = 2.1 Hz, 1H);  $^{13}\text{C}$  NMR (75.4 MHz,  $\text{CDCl}_3$ )  $\delta$  = 136.6 (C), 134.6 (C), 133.5 (C), 129.9 (C), 127.0 (CH), 125.7 (CH), 123.25 (CH), 123.19 (CH), 119.9 (CH), 114.5 (C), 110.0 (CH), 100.2 (CH); EI-LRMS  $m/z$  281 ( $\text{M}^+ + 2$ , 100), 279 ( $\text{M}^+$ , 96), 198 (38), 171 (61), 154 (27), 126 (32); HRMS calcd for  $\text{C}_{12}\text{H}_8\text{BrNS}$ , 276.9561; found, 276.9576.

### General procedure for the synthesis of 4-halo-1H-indoles **3**, **11** and **12** from 2,3-dihaloanilides **8** (one pot procedure):

A mixture of the corresponding *N*-(3-halo-2-iodophenyl)-2-hydroxy-2-methylpropanamide **8** (1 equiv), alkyne (1.5 equiv),  $\text{PdCl}_2(\text{PPh}_3)_2$  (3 mol%), CuI (5 mol%) and  $\text{Et}_2\text{NH}$  (1.5 equiv) in anhydrous DMA (4  $\text{cm}^3/\text{mol}$ ) was stirred under a nitrogen atmosphere at 80 °C (for **8a** and **8b**), at 50 °C (for **8c**), or at 40 °C (when trimethylsilylacetylene is used as alkyne) until complete consumption of starting material **8** as monitored by GC-MS (2–5 h). Then, freshly powdered NaOH (10 equiv) was added to the reaction mixture and it was refluxed under a nitrogen atmosphere at 140 °C until the cyclization was completed (3–4 h, as monitored by GC-MS). After cooling of the reaction mixture,  $\text{CH}_2\text{Cl}_2$  (20  $\text{cm}^3$ ) and aq HCl (20  $\text{cm}^3$  of a 0.5M solution) were added. The separated aqueous phase was extracted with  $\text{CH}_2\text{Cl}_2$  (2  $\times$  20  $\text{cm}^3$ ) and the combined organic layers were washed with water (2  $\times$  60  $\text{cm}^3$ ). The organic layer was dried over anhydrous  $\text{Na}_2\text{SO}_4$  and concentrated

under reduced pressure. The remaining residue was purified by column chromatography on silica gel (hexane/EtOAc) to afford the corresponding 4-halo-1*H*-indoles **3**, **11** and **12**.

**4-Fluoro-2-phenyl-1*H*-indole (3a):** Treatment of **8a** (161 mg, 0.5 mmol) with phenylacetylene (77 mg, 0.75 mmol), PdCl<sub>2</sub>(PPh<sub>3</sub>)<sub>2</sub> (10 mg, 3 mol%), CuI (5 mg, 5 mol%) and Et<sub>2</sub>NH (54 mg, 0.75 mmol) in DMA (2 mL) for 3 h and then, with NaOH (200 mg, 5 mmol) for 4 h according to the general procedure, and purification by column chromatography (hexane/EtOAc, 8/1) on silica gel afforded **3a** (90 mg, 85%), whose spectroscopic data have been reported above.

**2-Butyl-4-fluoro-1*H*-indole (3b):** Treatment of **8a** (161 mg, 0.5 mmol) with 1-hexyne (62 mg, 0.75 mmol), PdCl<sub>2</sub>(PPh<sub>3</sub>)<sub>2</sub> (10 mg, 3 mol%), CuI (5 mg, 5 mol%) and Et<sub>2</sub>NH (54 mg, 0.75 mmol) in DMA (2 mL) for 3 h and then, with NaOH (200 mg, 5 mmol) for 3 h according to the general procedure, and purification by column chromatography (hexane/EtOAc, 8/1) on silica gel afforded **3b** (74 mg, 77%) as a pale brown oil: *R*<sub>f</sub> 0.50 (hexane/EtOAc, 4/1); <sup>1</sup>H NMR (300 MHz, CDCl<sub>3</sub>) δ = 7.92 (br s, 1H), 7.11–7.00 (m, 2H), 6.78 (ddd, *J* = 10.4, 6.9, 1.7 Hz, 1H), 6.35 (dd, *J* = 2.2, 0.8 Hz, 1H), 2.75 (t, *J* = 7.6 Hz, 2H), 1.77–1.66 (m, 2H), 1.51–1.38 (m, 2H), 0.99 (t, *J* = 7.3 Hz, 3H); <sup>13</sup>C NMR (75.4 MHz, CDCl<sub>3</sub>) δ = 155.9 (d, *J* = 245.2 Hz, C), 140.1 (C), 138.6 (d, *J* = 11.8 Hz, C), 121.4 (d, *J* = 7.6 Hz, CH), 117.8 (d, *J* = 22.4 Hz, C), 106.5 (d, *J* = 3.4 Hz, CH), 104.5 (d, *J* = 19.1 Hz, CH), 95.4 (CH), 31.3 (CH<sub>2</sub>), 27.9 (CH<sub>2</sub>), 22.5 (CH<sub>2</sub>), 14.0 (CH<sub>3</sub>); HRMS calcd for C<sub>12</sub>H<sub>14</sub>FN, 191.1110; found, 191.1106.

**4-Chloro-2-phenyl-1*H*-indole (11a):** Treatment of **8b** (170 mg, 0.5 mmol) with phenylacetylene (77 mg, 0.75 mmol), PdCl<sub>2</sub>(PPh<sub>3</sub>)<sub>2</sub> (10 mg, 3 mol%), CuI (5 mg, 5 mol%) and Et<sub>2</sub>NH (54 mg, 0.75 mmol) in DMA (2 mL) for 3 h and then, with NaOH (200 mg, 5 mmol) for 4 h according to the general procedure, and purification by column chromatography (hexane/EtOAc, 7/1) on silica gel afforded **11a** (92 mg, 81%), whose spectroscopic data have been reported above.

**2-Butyl-4-chloro-1*H*-indole (11b):** Treatment of **8b** (339 mg, 1 mmol) with 1-hexyne (123 mg, 1.5 mmol), PdCl<sub>2</sub>(PPh<sub>3</sub>)<sub>2</sub> (21 mg, 3 mol%), CuI (9 mg, 5 mol%) and Et<sub>2</sub>NH (109 mg, 1.5 mmol) in DMA (4 mL) for 2.5 h and then, with NaOH (400 mg, 10 mmol) for 3 h according to the general procedure, and purification by column chromatography (hexane/EtOAc, 8/1) on silica gel afforded **11b** (147 mg, 71%), whose spectroscopic data have been reported above.

**4-Chloro-2-cyclohexenyl-1*H*-indole (11d):** Treatment of **8b** (679 mg, 2 mmol) with 1-ethynylcyclohexene (320 mg, 3 mmol), PdCl<sub>2</sub>(PPh<sub>3</sub>)<sub>2</sub> (42 mg, 3 mol%), CuI (19 mg, 5 mol%) and Et<sub>2</sub>NH (220 mg, 3 mmol) in DMA (6 mL) for 2 h and then, with NaOH (800 mg, 20 mmol) for 3 h according to the general procedure, and purification by column chromatography (hexane/EtOAc, 8/1) on silica gel afforded **11d** (379 mg, 82%), whose spectroscopic data have been reported above.

**4-Chloro-1*H*-indole (11e):**<sup>9</sup> Treatment of **8b** (170 mg, 0.5 mmol) with trimethylsilylacetylene (73 mg, 0.75 mmol), PdCl<sub>2</sub>(PPh<sub>3</sub>)<sub>2</sub> (10 mg, 3 mol%), CuI (5 mg, 5 mol%) and Et<sub>2</sub>NH (54 mg, 0.75 mmol) in DMA (2 mL) for 5.5 h and then, with NaOH (200 mg, 5 mmol) for 3 h according to the general procedure, and purification by column chromatography (hexane/EtOAc, 8/1) on silica gel afforded **11e** (46 mg, 61%), whose spectroscopic data have been reported above.

**4-Chloro-2-(3-chlorophenyl)-1H-indole (11f):** Treatment of **8b** (170 mg, 0.5 mmol) with 1-chloro-3-ethynylbenzene (102 mg, 0.75 mmol), PdCl<sub>2</sub>(PPh<sub>3</sub>)<sub>2</sub> (10 mg, 3 mol%), CuI (5 mg, 5 mol%) and Et<sub>2</sub>NH (54 mg, 0.75 mmol) in DMA (2 mL) for 2 h and then, with NaOH (200 mg, 5 mmol) for 3 h according to the general procedure, and purification by column chromatography (hexane/EtOAc, 7/1) on silica gel afforded **11f** (98 mg, 75%) as a brown solid: R<sub>f</sub> 0.63 (hexane/AcOEt, 3/1); mp 80–82 °C; <sup>1</sup>H NMR (300 MHz, CDCl<sub>3</sub>) δ = 8.44 (br s, 1H), 7.62 (t, *J* = 1.7 Hz, 1H), 7.50 (dt, *J* = 7.5, 1.6 Hz, 1H), 7.36 (t, *J* = 7.5 Hz, 1H), 7.32–7.24 (m, 2H), 7.17–7.08 (m, 2H), 6.92 (dd, *J* = 2.2, 0.7 Hz, 1H); <sup>13</sup>C NMR (75.4 MHz, CDCl<sub>3</sub>) δ = 137.5 (C), 136.9 (C), 135.1 (C), 133.5 (C), 130.4 (CH), 128.1 (CH), 128.0 (C), 126.1 (C), 125.3 (CH), 123.39 (CH), 123.38 (CH), 120.3 (CH), 109.7 (CH), 99.4 (CH); EI-LRMS *m/z* 265 (M<sup>+</sup>+4, 13), 263 (M<sup>+</sup>+2, 62), 261 (M<sup>+</sup>, 100), 226 (13), 199 (30), 190 (35), 164 (30), 89 (49); HRMS calcd for C<sub>14</sub>H<sub>9</sub>Cl<sub>2</sub>N, 261.0112; found, 261.0112.

**4-Bromo-2-phenyl-1H-indole (12a):** Treatment of **8c** (192 mg, 0.5 mmol) with phenylacetylene (77 mg, 0.75 mmol), PdCl<sub>2</sub>(PPh<sub>3</sub>)<sub>2</sub> (10 mg, 3 mol%), CuI (5 mg, 5 mol%) and Et<sub>2</sub>NH (54 mg, 0.75 mmol) in DMA (2 mL) for 3 h and then, with NaOH (200 mg, 5 mmol) for 4 h according to the general procedure, and purification by column chromatography (hexane/EtOAc, 8/1) on silica gel afforded **12a** (66 mg, 49%), whose spectroscopic data have been reported above.

**4-Bromo-2-butyl-1H-indole (12b):** Treatment of **8c** (576 mg, 1.5 mmol) with 1-hexyne (182 mg, 2.25 mmol), PdCl<sub>2</sub>(PPh<sub>3</sub>)<sub>2</sub> (31 mg, 3 mol%), CuI (14 mg, 5 mol%) and Et<sub>2</sub>NH (164 mg, 2.25 mmol) in DMA (6 mL) for 2 h and then, with NaOH (600 mg, 15 mmol) for 3 h according to the general procedure, and purification by column chromatography (hexane/EtOAc, 7/1) on silica gel afforded **12b** (207 mg, 55%), whose spectroscopic data have been reported above.

**4-Bromo-2-(3-chlorophenyl)-1H-indole (12g):** Treatment of **8c** (192 mg, 0.5 mmol) with 1-chloro-3-ethynylbenzene (102 mg, 0.75 mmol), PdCl<sub>2</sub>(PPh<sub>3</sub>)<sub>2</sub> (10 mg, 3 mol%), CuI (5 mg, 5 mol%) and Et<sub>2</sub>NH (54 mg, 0.75 mmol) in DMA (2 mL) for 2 h and then, with NaOH (200 mg, 5 mmol) for 4 h according to the general procedure, and purification by column chromatography (hexane/EtOAc, 8/1) on silica gel afforded **12g** (73 mg, 48%) as a brown solid: R<sub>f</sub> 0.38 (hexane/AcOEt, 4/1); mp 89–91 °C; <sup>1</sup>H NMR (300 MHz, CDCl<sub>3</sub>) δ = 8.47 (br s, 1H), 7.67–7.64 (m, 1H), 7.55 (ddd, *J* = 7.6, 2.8, 1.3 Hz, 1H), 7.43–7.27 (m, 4H), 7.06 (td, *J* = 8.1, 1.2 Hz, 1H), 6.90–6.87 (m, 1H); <sup>13</sup>C NMR (75.4 MHz, CDCl<sub>3</sub>) δ = 137.1 (C), 137.0 (C), 135.2 (C), 133.6 (C), 130.5 (CH), 129.9 (C), 128.2 (CH), 125.4 (CH), 123.8 (CH), 123.5 (CH), 123.4 (CH), 114.9 (C), 110.3 (CH), 101.2 (CH); EI-LRMS *m/z* 309 (M<sup>+</sup>+4, 23), 307 (M<sup>+</sup>+2, 100), 305 (M<sup>+</sup>, 80), 226 (16), 199 (34), 190 (74), 163 (60); HRMS calcd for C<sub>14</sub>H<sub>9</sub>BrClN, 304.9607; found, 304.9620.

### Synthesis of 2-butyl-4-(furan-2-yl)-1H-indole (13):

Pre-milled Pd(OAc)<sub>2</sub> (2 mol%)/XPhos (4 mol%) and CsF (100 mg, 0.66 mmol) were added to a Schlenk tube under a nitrogen atmosphere, and the tube was evacuated and backfilled with nitrogen.<sup>10</sup> Then, 4-chloroindole derivative **11b** (62 mg, 0.3 mmol), tributyl(furan-2-yl)stannane (118 mg, 0.33 mmol) and DME (0.8 cm<sup>3</sup>) were added to the tube. The reaction was heated to 80 °C with stirring for 3 h (the consumption of the starting material was monitored by GC-MS). After cooling to room temperature of the reaction vessel, the crude was filtered through zelite and washed with EtOAc (20 cm<sup>3</sup>). The solvent was concentrated under

reduced pressure and the residue was purified by column chromatography on silica gel (hexane/EtOAc, 7/1) to afford **13** (66 mg, 92%) as a white solid:  $R_f$  0.43 (hexane/AcOEt, 6/1); mp 50–52 °C;  $^1\text{H}$  NMR (300 MHz,  $\text{CDCl}_3$ )  $\delta$  = 7.85 (br s, 1H), 7.61 (d,  $J$  = 1.8 Hz, 1H), 7.56–7.52 (m, 1H), 7.23–7.20 (m, 2H), 6.85 (d,  $J$  = 3.3 Hz, 1H), 6.75 (s, 1H), 6.60 (ddd,  $J$  = 3.3 Hz, 1.8, 0.6 Hz, 1H), 2.76 (t,  $J$  = 7.6 Hz, 2H), 1.79–1.68 (m, 2H), 1.52–1.39 (m, 2H), 1.01 (t,  $J$  = 7.3 Hz, 3H);  $^{13}\text{C}$  NMR (75.4 MHz,  $\text{CDCl}_3$ )  $\delta$  = 154.8 (C), 141.5 (CH), 141.0 (C), 136.6 (C), 124.4 (C), 122.1 (C), 121.0 (CH), 116.4 (CH), 111.6 (CH), 110.0 (CH), 106.2 (CH), 99.6 (CH), 31.4 ( $\text{CH}_2$ ), 28.1 ( $\text{CH}_2$ ), 22.5 ( $\text{CH}_2$ ), 14.0 ( $\text{CH}_3$ ); EI-LRMS  $m/z$  239 ( $\text{M}^+$ , 56), 196 (100), 167 (14), 154 (4); HRMS calcd for  $\text{C}_{16}\text{H}_{17}\text{NO}$ , 239.1310; found, 239.1319.

#### Synthesis of 2,4-Diphenyl-1H-indole (14):

4-Bromo-1H-indole derivative **12a** (81 mg, 0.3 mmol), phenylboronic acid (55 mg, 0.45 mmol) and  $[\text{Pd}(\text{PPh}_3)_4]$  (10 mg, 3 mol%) were introduced in a Schlenk tube under a nitrogen atmosphere. Then, DME (5  $\text{cm}^3$ ) was added followed by the addition of  $\text{Na}_2\text{CO}_3$  (48 mg, 0.45 mmol) in  $\text{H}_2\text{O}$  (2  $\text{cm}^3$ ). The reaction mixture was vigorously stirred and heated at 80 °C overnight (the progress of the reaction was monitored by GC-MS).<sup>11,12</sup> Then,  $\text{CH}_2\text{Cl}_2$  (10  $\text{cm}^3$ ) and  $\text{H}_2\text{O}$  were added to the cooled reaction mixture. The separated aqueous phase was extracted with  $\text{CH}_2\text{Cl}_2$  ( $3 \times 20 \text{ cm}^3$ ). The combined organic extracts were dried over anhydrous  $\text{Na}_2\text{SO}_4$ , and evaporated under reduced pressure. The residue was purified by column chromatography (hexane/EtOAc, 8/1) on silica gel to afford **14** (74 mg, 93%) as a white solid:  $R_f$  0.48 (hexane/AcOEt, 4/1); mp 205–207 °C (lit.<sup>13</sup> mp 209 °C);  $^1\text{H}$  NMR (300 MHz,  $\text{CDCl}_3$ )  $\delta$  = 8.42 (br s, 1H), 7.89–7.82 (m, 2H), 7.67 (d,  $J$  = 8.1 Hz, 2H), 7.61 (t,  $J$  = 7.7 Hz, 2H), 7.53–7.44 (m, 3H), 7.43–7.25 (m, 4H), 7.12 (d,  $J$  = 2.2 Hz, 1H);  $^{13}\text{C}$  NMR (75.4 MHz,  $\text{CDCl}_3$ )  $\delta$  = 141.3 (C), 138.3 (C), 137.3 (C), 134.5 (C), 132.2 (C), 129.1 (2  $\times$  CH), 128.9 (2  $\times$  CH), 128.7 (2  $\times$  CH), 127.8 (CH), 127.6 (C), 127.1 (CH), 125.2 (2  $\times$  CH), 122.7 (CH), 120.2 (CH), 110.2 (CH), 99.6 (CH); EI-LRMS  $m/z$  269 ( $\text{M}^+$ , 100), 190 (10), 165 (53), 133 (11), 77 (28); HRMS calcd for  $\text{C}_{20}\text{H}_{15}\text{N}$ , 269.1204; found, 269.1204.

#### Synthesis of 4-(hex-1-ynyl)-2-phenyl-1H-indole (15):

A mixture of 4-bromo-1H-indole derivative **12a** (81 mg, 0.3 mmol), 1-hexyne (37 mg, 0.45 mmol),  $\text{PdCl}_2(\text{PPh}_3)_2$  (12 mg, 6 mol%), CuI (6 mg, 10 mol%) and  $\text{Et}_2\text{NH}$  (33 mg, 0.45 mmol) in anhydrous DMF (3  $\text{cm}^3$ ) was stirred under a nitrogen atmosphere at 80 °C for 17 h (complete consumption of the starting material was monitored by GC-MS). Then,  $\text{CH}_2\text{Cl}_2$  (20  $\text{cm}^3$ ) and aq HCl (20  $\text{cm}^3$  of a 0.5M solution) were added to the cooled reaction mixture. The separated aqueous phase was extracted with  $\text{CH}_2\text{Cl}_2$  ( $3 \times 15 \text{ cm}^3$ ). The combined organic layers were washed with water ( $2 \times 40 \text{ cm}^3$ ), dried over anhydrous  $\text{Na}_2\text{SO}_4$ , and concentrated under reduced pressure. The remaining residue was purified by column chromatography on silica gel (hexane/EtOAc, 8/1) to afford **15** (63 mg, 77%) as a brown solid:  $R_f$  0.42 (hexane/AcOEt, 5/1); mp 33–35 °C;  $^1\text{H}$  NMR (300 MHz,  $\text{CDCl}_3$ )  $\delta$  = 8.39 (br s, 1H), 7.69 (d,  $J$  = 7.3 Hz, 2H), 7.45 (t,  $J$  = 7.7 Hz, 2H), 7.33 (d,  $J$  = 7.3 Hz, 2H), 7.21 (d,  $J$  = 7.3 Hz, 1H), 7.11 (t,  $J$  = 7.7 Hz, 1H), 6.99–6.97 (m, 1H), 2.55 (t,  $J$  = 6.9 Hz, 2H), 1.75–1.63 (m, 2H), 1.62–1.50 (m, 2H), 1.00 (t,  $J$  = 7.2 Hz, 3H);  $^{13}\text{C}$  NMR (75.4 MHz,  $\text{CDCl}_3$ )  $\delta$  = 138.2 (C), 136.5 (C), 132.3 (C), 131.1 (C), 129.2 (2  $\times$  CH), 128.0 (CH), 125.3 (2  $\times$  CH), 123.9 (CH), 122.3 (CH), 115.8 (C), 110.7 (CH), 99.9 (CH), 93.2 (C), 79.3 (C), 31.2 ( $\text{CH}_2$ ), 22.2 ( $\text{CH}_2$ ), 19.6 ( $\text{CH}_2$ ), 13.9 ( $\text{CH}_3$ ); EI-LRMS  $m/z$

273 ( $M^+$ , 89), 258 (16), 244 (38), 230 (100), 202 (29), 127 (23); HRMS calcd for  $C_{20}H_{19}N$ , 273.1517; found, 273.1511.

### Synthesis of 4-Bromo-3-((*Z*)-4-methyl-1,3-diphenylpenta-1,3-dienyl)-2-phenyl-1*H*-indole (**16**):

To a solution of 4-bromo-1*H*-indole derivative **12a** (42 mg, 0.155 mmol) and 4-methyl-1,3-diphenylpenta-1-yn-3-ol (42 mg, 0.17 mmol) in MeCN (2 cm<sup>3</sup>) was added *p*-toluenesulfonic acid monohydrate (13 mg, 10 mol%).<sup>14</sup> The resulting mixture was heated at 80 °C for 5.5 h and monitored by GC-MS. The solvent was evaporated under reduced pressure. The remaining residue was purified by column chromatography on silica gel (hexane/EtOAc, 10/1) to afford **16** (62 mg, 80%) as a white solid:  $R_f$  0.36 (hexane/AcOEt, 5/1); mp 72–74 °C; <sup>1</sup>H NMR (300 MHz, CDCl<sub>3</sub>)  $\delta$  = 7.98 (br s, 1H), 7.55–7.48 (m, 4H), 7.39–7.23 (m, 7H), 7.05 (d,  $J$  = 7.8 Hz, 1H), 6.95 (d,  $J$  = 7.8 Hz, 1H), 6.82 (t,  $J$  = 7.8 Hz, 1H), 6.77–6.64 (m, 4H), 6.50 (t,  $J$  = 7.1 Hz, 1H), 1.43 (s, 6H); <sup>13</sup>C NMR (75.4 MHz, CDCl<sub>3</sub>)  $\delta$  = 144.2 (C), 141.3 (C), 136.91 (C), 136.86 (C), 134.9 (C), 134.5 (C), 134.1 (C), 133.3 (CH), 132.8 (C), 128.55 (2  $\times$  CH), 128.53 (2  $\times$  CH), 128.4 (2  $\times$  CH), 127.8 (CH), 127.2 (2  $\times$  CH), 126.94 (2  $\times$  CH), 126.87 (C), 126.8 (CH), 126.2 (2  $\times$  CH), 124.3 (CH), 124.0 (CH), 122.7 (CH), 115.1 (C), 113.3 (C), 109.4 (CH), 22.2 (CH<sub>3</sub>), 21.0 (CH<sub>3</sub>); EI-LRMS  $m/z$  505 ( $M^+$ +2, 37), 503 ( $M^+$ , 36), 424 (41), 409 (72), 207 (100); HRMS calcd for  $C_{32}H_{26}BrN$ , 503.1249; found, 503.1255.

### Synthesis of 4-chloro-2-phenyl-3-(phenylthio)-1*H*-indole (**17**):

Freshly powdered NaOH (48 mg, 1.2 mmol) was added to a solution of **9a** (125 mg, 0.4 mmol) in anhydrous DMA (3 cm<sup>3</sup>). The resulting mixture was heated under a nitrogen atmosphere for 5 h at 140 °C (until the cyclization was completed as monitored by GC-MS). Then, Ph<sub>2</sub>S<sub>2</sub> (104 mg, 0.48 mmol) was added to the mixture and the reaction was stirred overnight at 140 °C. Then, CH<sub>2</sub>Cl<sub>2</sub> (10 cm<sup>3</sup>) and aq HCl (10 cm<sup>3</sup> of a 0.5M solution) were added to the cooled reaction mixture. The separated aqueous phase was extracted with CH<sub>2</sub>Cl<sub>2</sub> (3  $\times$  10 cm<sup>3</sup>). The combined organic layers were washed with water (2  $\times$  30 cm<sup>3</sup>), dried over anhydrous Na<sub>2</sub>SO<sub>4</sub>, and concentrated under reduced pressure. The remaining residue was purified by column chromatography on silica gel (hexane/EtOAc, 5/1) to afford **17** (105 mg, 78%) as a white solid:  $R_f$  0.40 (hexane/AcOEt, 5/1); mp 131–133 °C; <sup>1</sup>H NMR (300 MHz, CDCl<sub>3</sub>)  $\delta$  = 8.70 (br s, 1H), 7.66 (dd,  $J$  = 6.6, 2.9 Hz, 2H), 7.43–7.38 (m, 3H), 7.36–7.29 (m, 1H), 7.26–7.05 (m, 7H); <sup>13</sup>C NMR (75.4 MHz, CDCl<sub>3</sub>)  $\delta$  = 144.3 (C), 141.4 (C), 137.3 (C), 131.0 (C), 129.2 (CH), 128.9 (2  $\times$  CH), 128.7 (4  $\times$  CH), 127.0 (C), 126.8 (C), 125.3 (2  $\times$  CH), 124.6 (CH), 123.7 (CH), 122.8 (CH), 110.2 (CH), 98.8 (C); EI-LRMS  $m/z$  337 ( $M^+$ +2, 22), 335 ( $M^+$ , 51), 299 (16), 267 (15), 223 (100), 190 (12), 121 (22), 119 (23), 77 (86), 51 (67); HRMS calcd for  $C_{20}H_{14}ClNS$ , 335.0535; found, 335.0534.

## REFERENCES:

- (1) B. McKittrick, A. Failli, R. J. Steffan, R. M. Soll, P. Hughes, J. Schmid, A. A. Asselin, C. C. Shaw, R. Noureldin, G. Gavin, *J. Heterocycl. Chem.*, 1990, **27**, 2151.
- (2) C. E. Stauffer, *J. Am. Chem. Soc.*, 1972, **94**, 7887.
- (3) Y.-Q. Fang, M. Lautens, *Org. Lett.*, 2005, **7**, 3549.

- (4) R. Sanz, M. P. Castroviejo, Y. Fernández, F. J. Fañanás, *J. Org. Chem.*, 2005, **70**, 6548.
- (5) Developed by Kondo and Uchiyama for the chemoselective deprotonative zincation of functionalized aromatic compounds: (a) Y. Kondo, M. Shilai, M. Uchiyama, T. Sakamoto, *J. Am. Chem. Soc.*, 1999, **121**, 3539; (b) M. Uchiyama, T. Miyoshi, Y. Kajihara, T. Sakamoto, Y. Otani, T. Ohwada, Y. Kondo, *J. Am. Chem. Soc.*, 2002, **124**, 8514; (c) R. Sanz, M. P. Castroviejo, V. Guilarte, A. Pérez, F. J. Fañanás, *J. Org. Chem.*, 2007, **72**, 5113.
- (6) H. H. Hodgson, A. Kershaw, *J. Chem. Soc.*, 1929, 2917.
- (7) (a) J. F. W. McOmie, D. E. West, *Org. Synth., Collect. Vol. 5*, 1973, 412. (b) A. J. Peat, S. L. Buchwald, *J. Am. Chem. Soc.*, 1996, **118**, 1028.
- (8) K. Nishijima, T. Shinkawa, M. Ito, H. Nishida, I. Yamamoto, Y. Onuki, H. Inaba, S. Miyano, *J. Med. Chem.*, 1998, **33**, 763.
- (9) Commercially available.
- (10) J. R. Naber, S. L. Buchwald, *Adv. Synth. Catal.*, 2008, **350**, 957.
- (11) L. Brandsma, S. F. Vasilevsky, H. D. Verkruijsse, in *Application of Transition Metal Catalysts in Organic Synthesis*; Springer-Verlag, Berlin 1998; Ch. 11.
- (12) B. Witulski, J. R. Azcon, C. Alayrac, A. Arnautu, V. Collot, S. Rault, *Synthesis*, 2005, 771.
- (13) C. F. Allen, M. R. Gilbert, D. M. Young, *J. Org. Chem.*, 1937, **2**, 227.
- (14) R. Sanz, M. Gohain, D. Miguel, A. Martínez, F. Rodríguez, *Synlett*, 2009, 1985.



<sup>1</sup>H-NMR (300 MHz, CDCl<sub>3</sub>):

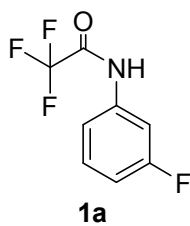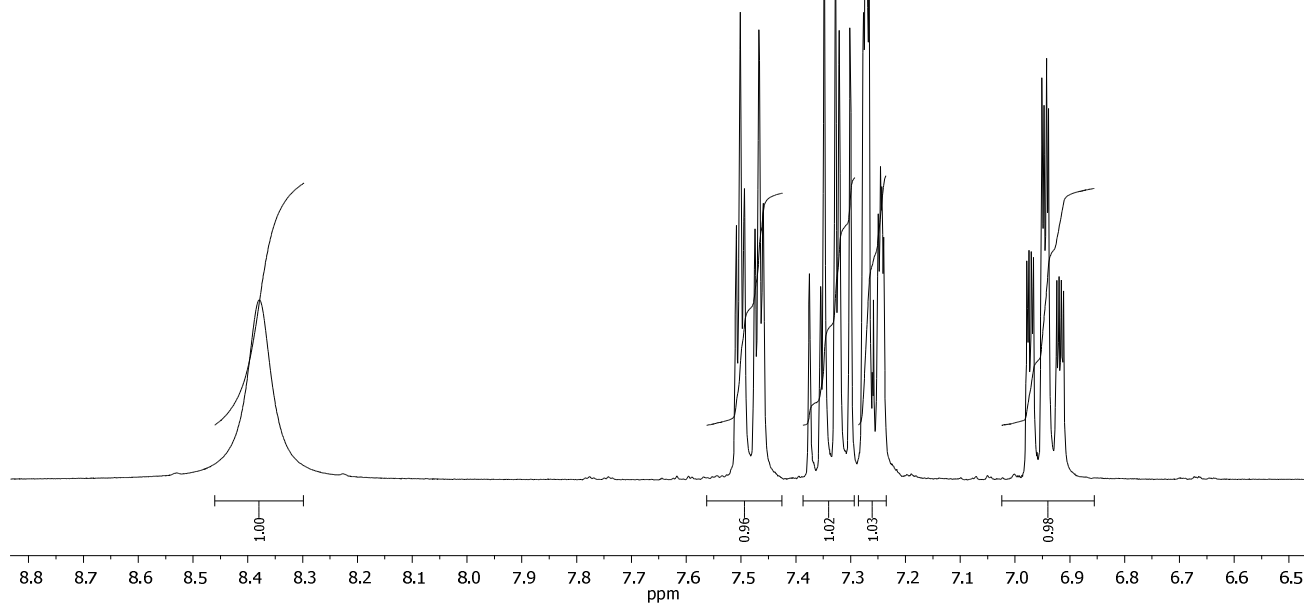

<sup>13</sup>C-NMR (75.4 MHz, CDCl<sub>3</sub>):

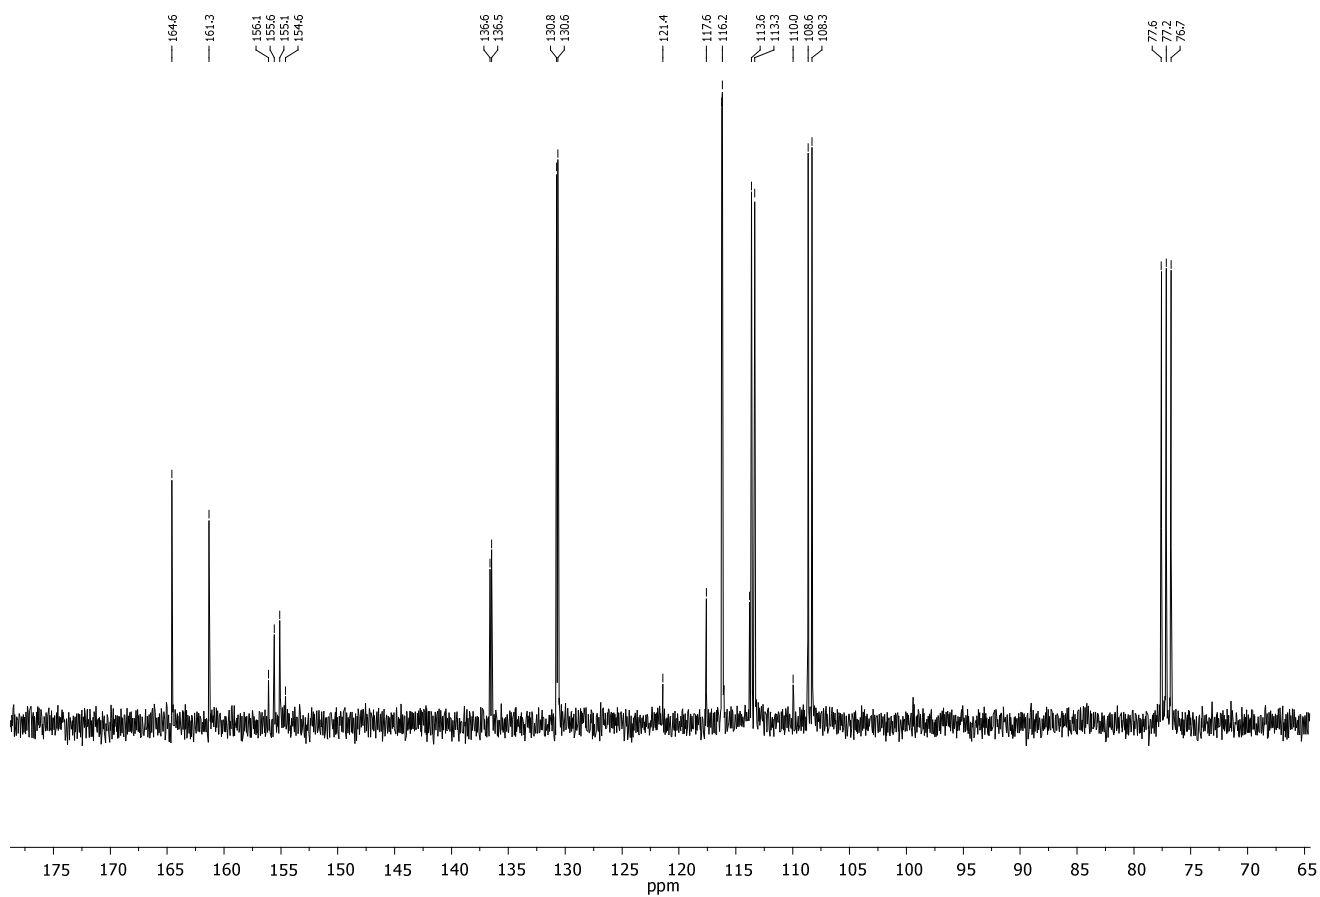

<sup>1</sup>H-NMR (300 MHz, CDCl<sub>3</sub>):

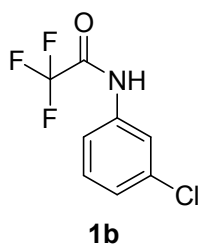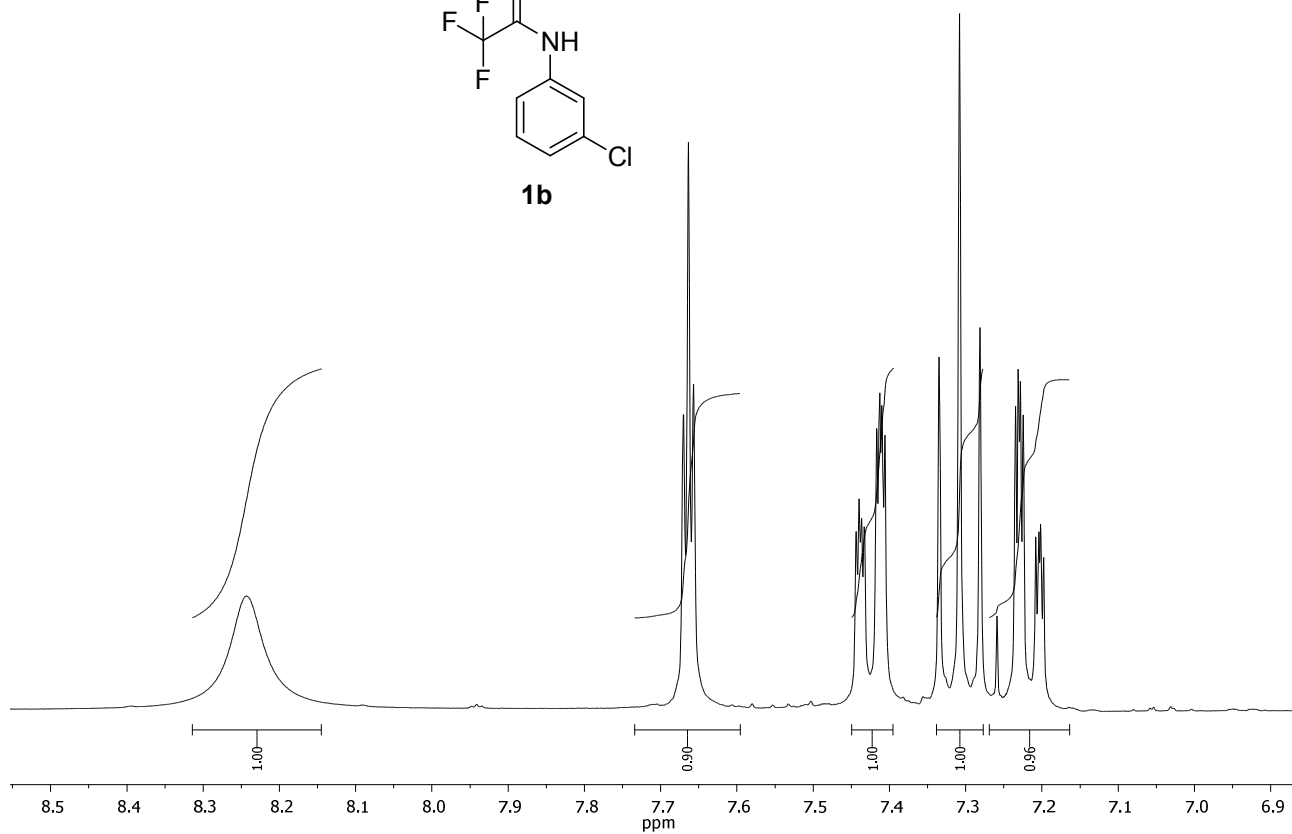

<sup>13</sup>C-NMR (75.4 MHz, CDCl<sub>3</sub>):

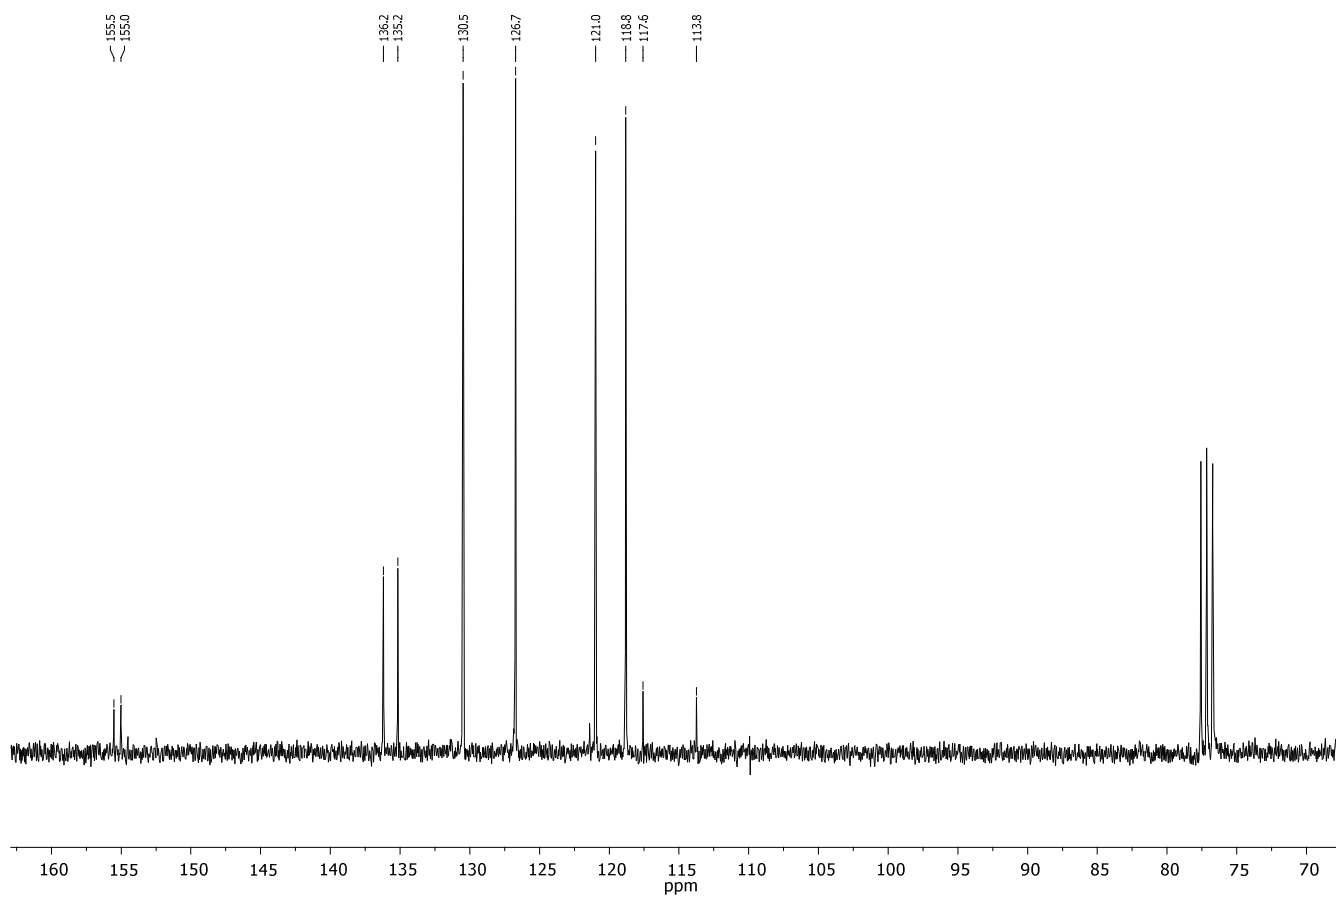

<sup>1</sup>H-NMR (300 MHz, CDCl<sub>3</sub>):

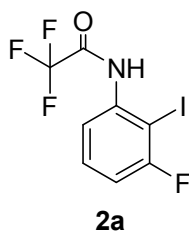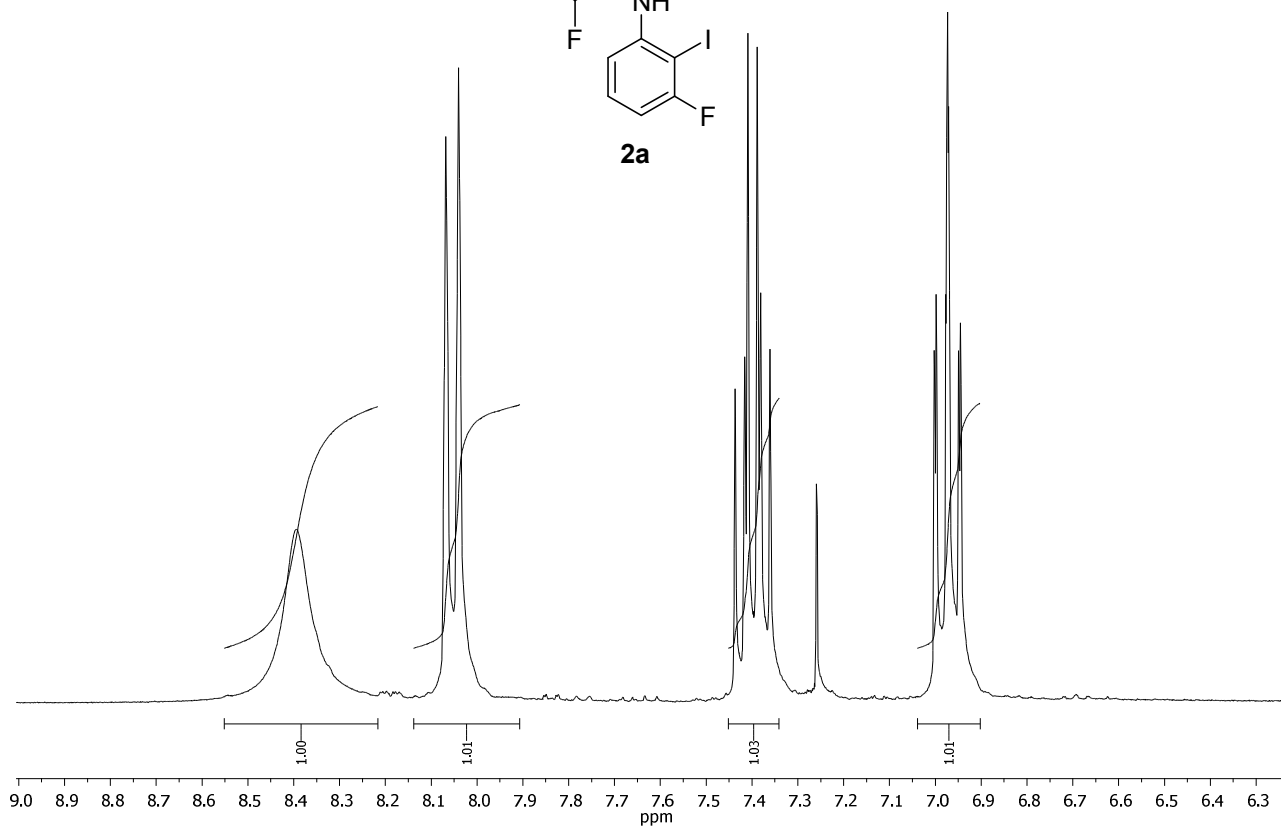

<sup>13</sup>C-NMR (75.4 MHz, CDCl<sub>3</sub>):

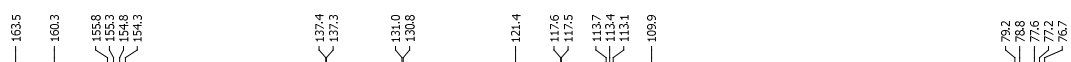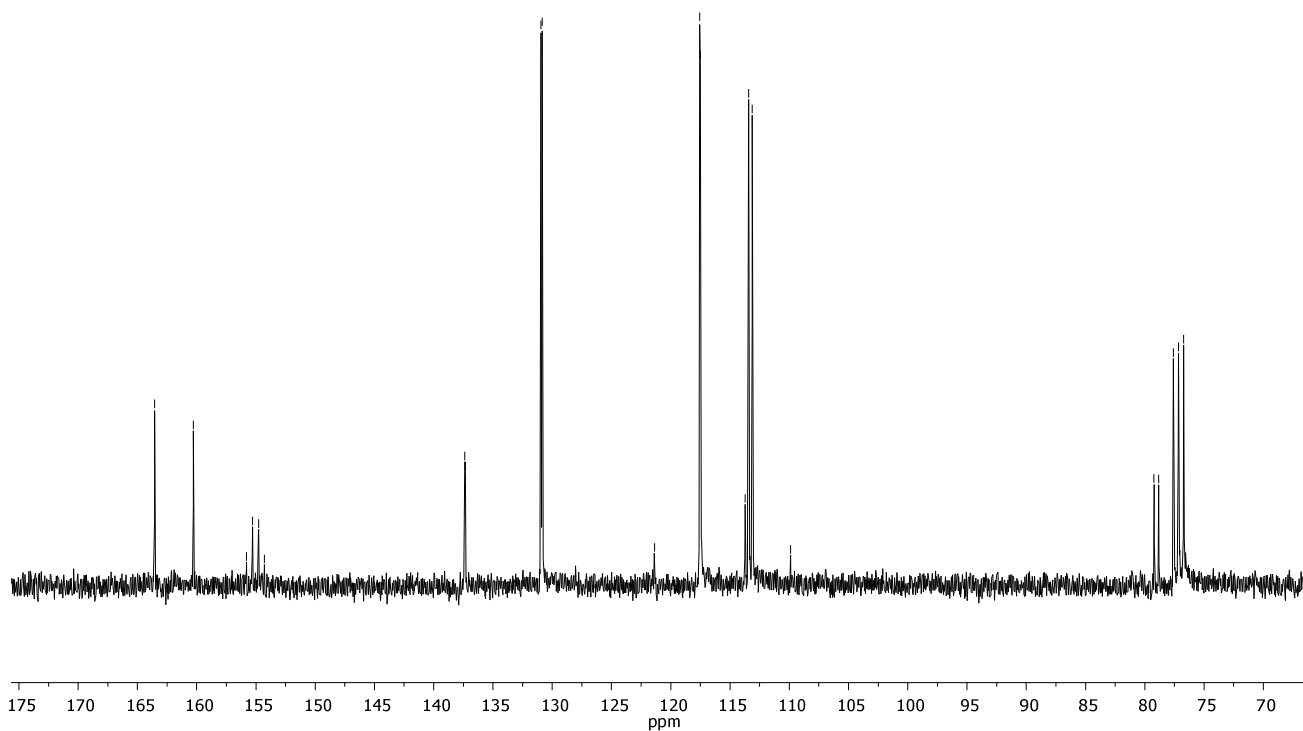

<sup>1</sup>H-NMR (300 MHz, CDCl<sub>3</sub>):

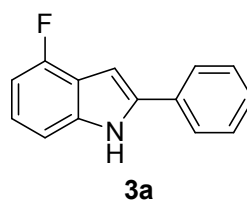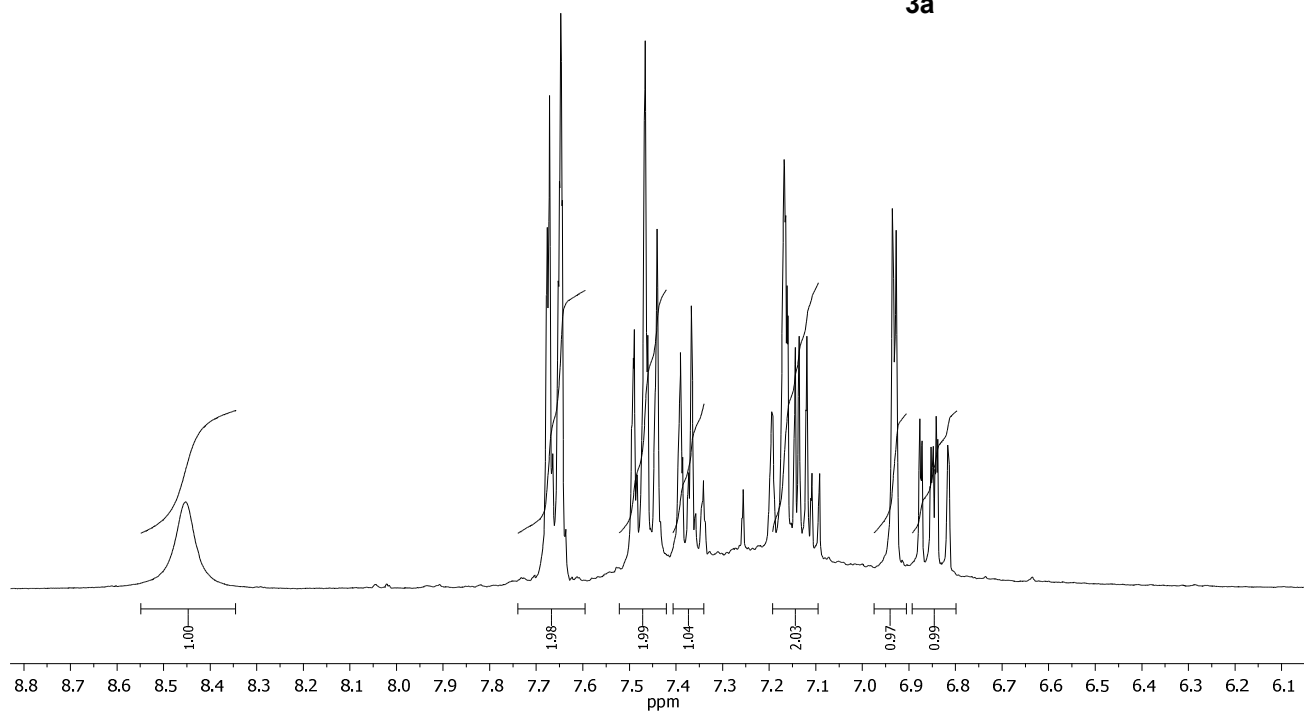

<sup>13</sup>C-NMR (75.4 MHz, CDCl<sub>3</sub>):

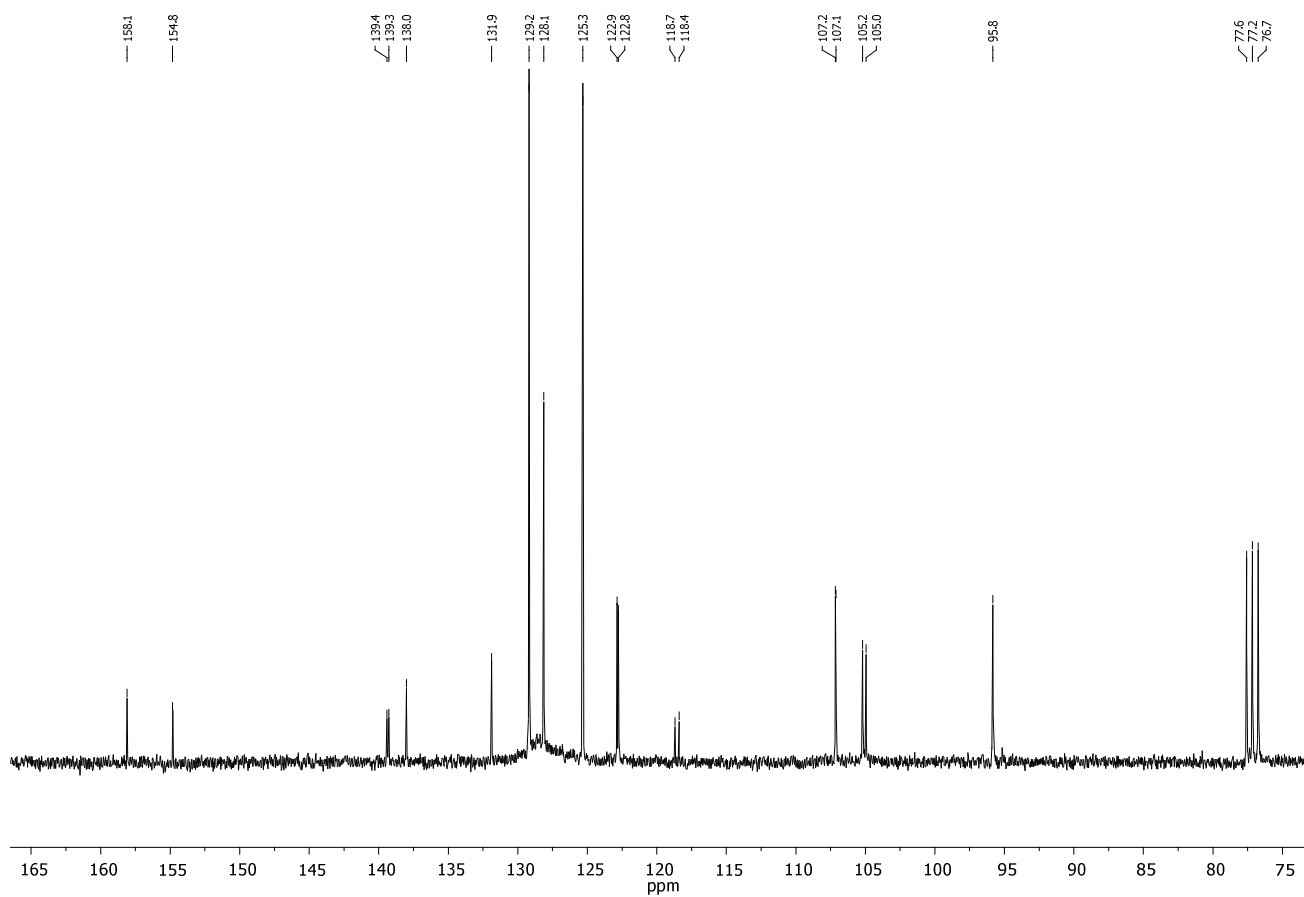

<sup>1</sup>H-NMR (300 MHz, CDCl<sub>3</sub>):

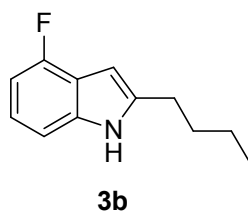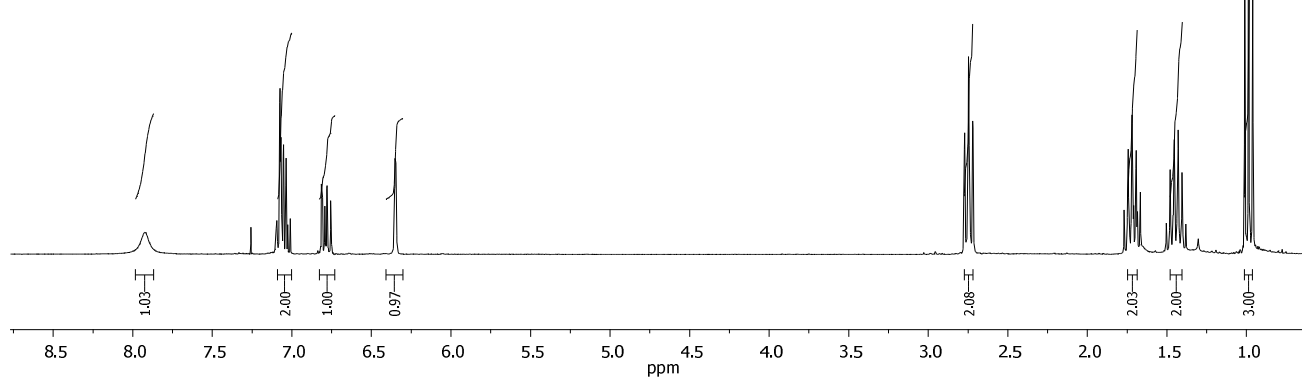

<sup>13</sup>C-NMR (75.4 MHz, CDCl<sub>3</sub>):

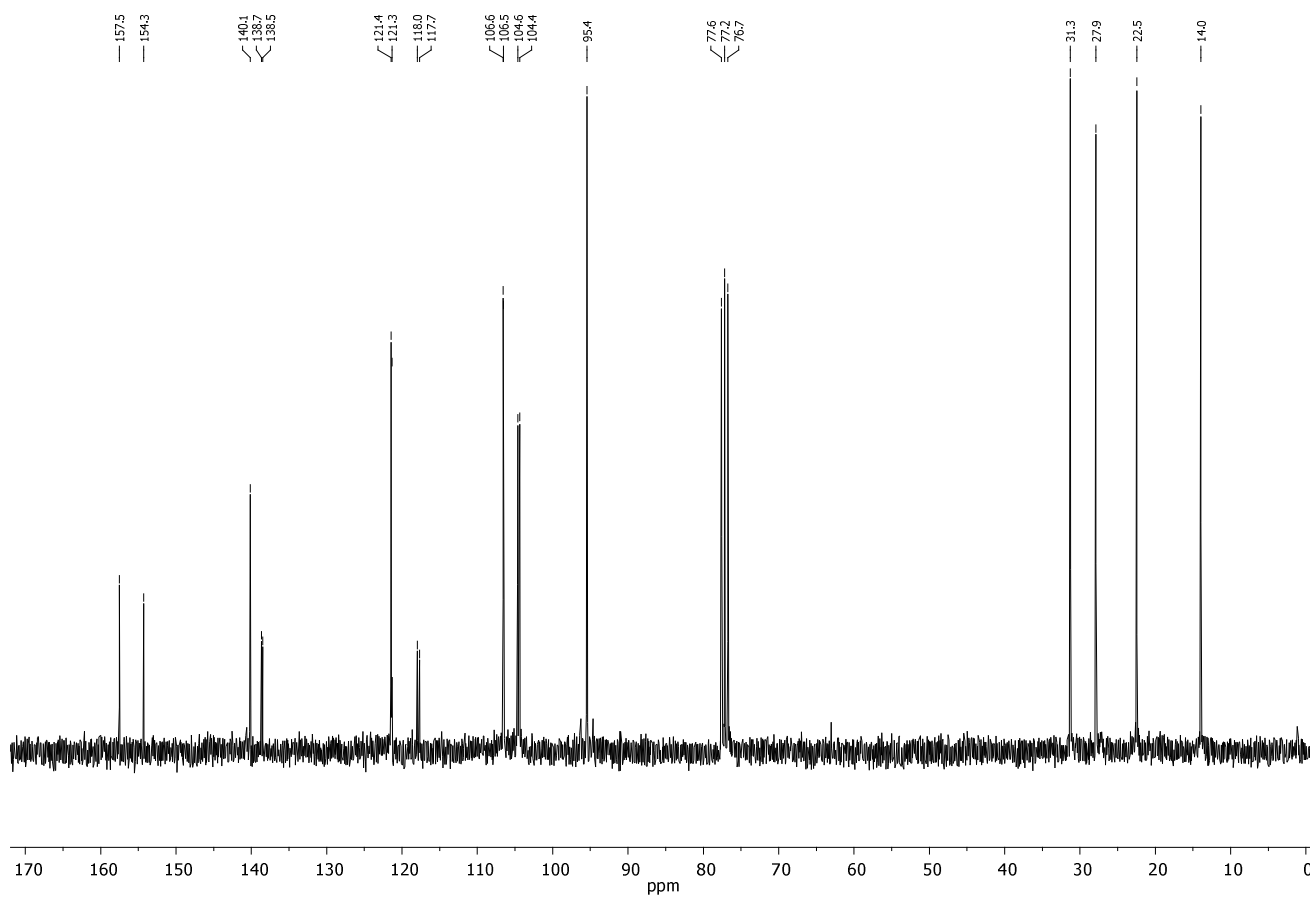

<sup>1</sup>H-NMR (300 MHz, CDCl<sub>3</sub>):

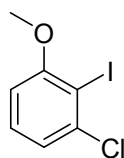

**5a**

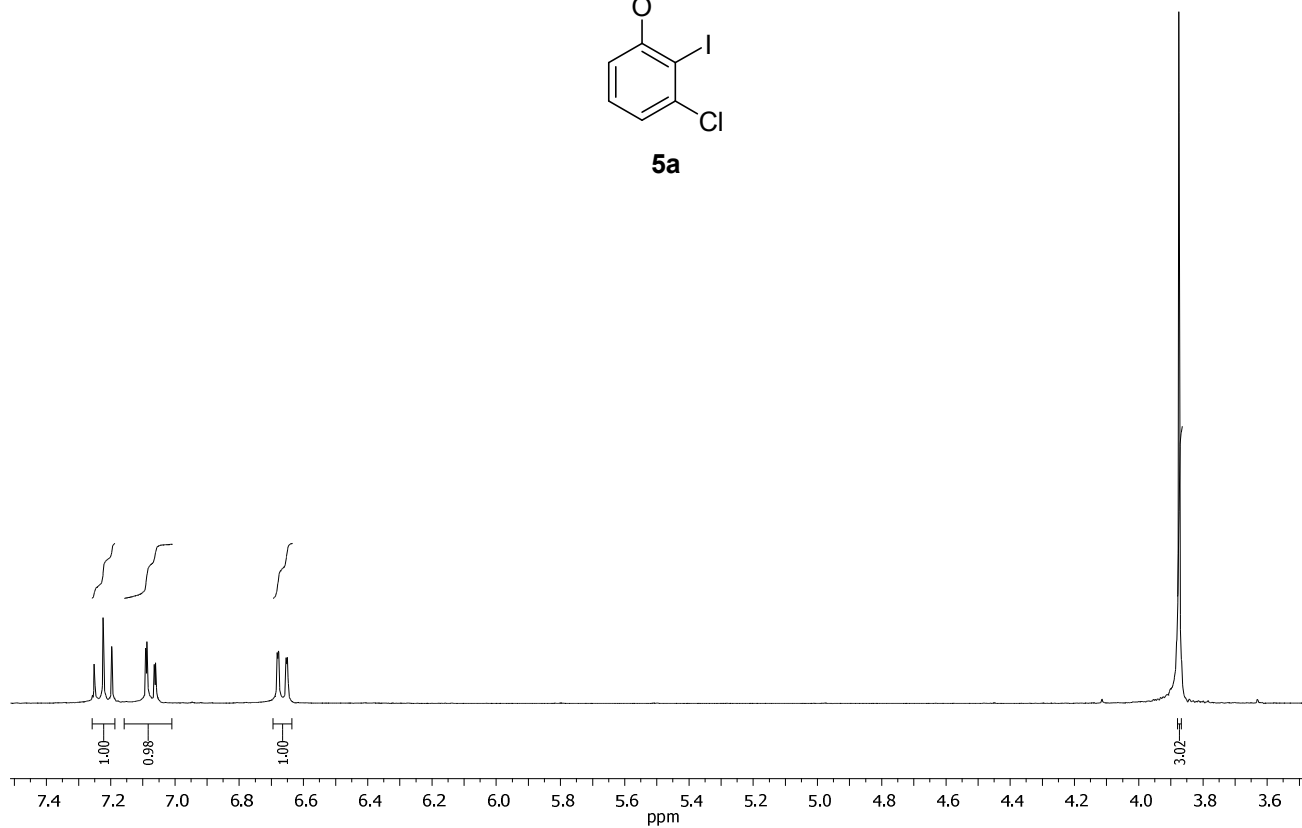

<sup>13</sup>C-NMR (75.4 MHz, CDCl<sub>3</sub>):

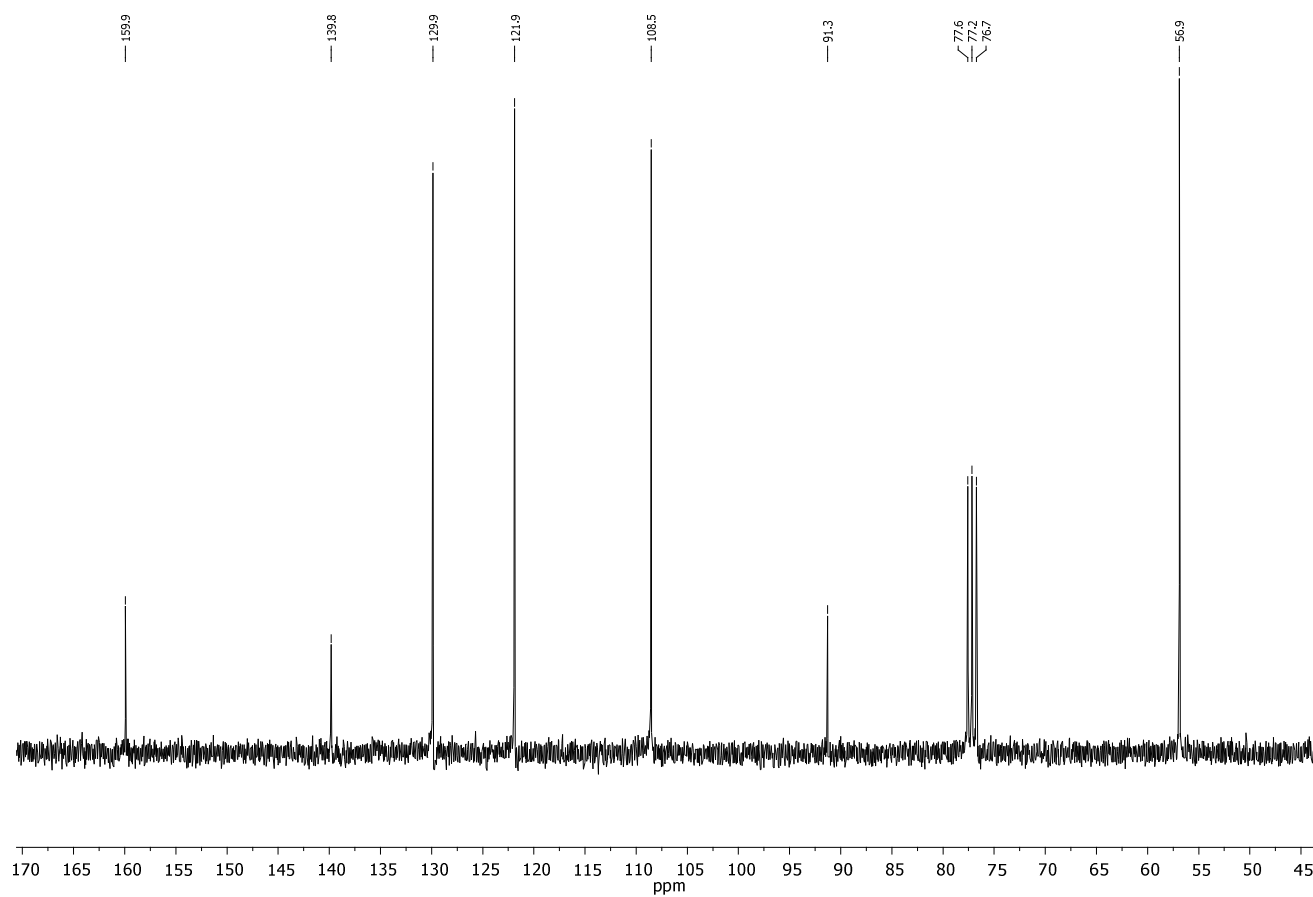

$^1\text{H}$ -NMR (300 MHz,  $\text{CDCl}_3$ ):

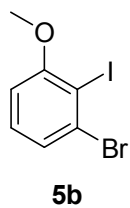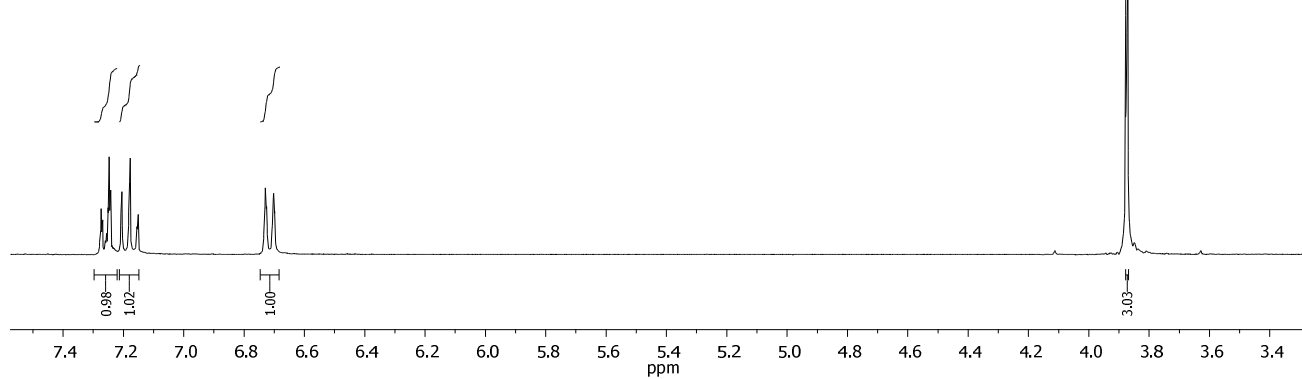

$^{13}\text{C}$ -NMR (75.4 MHz,  $\text{CDCl}_3$ ):

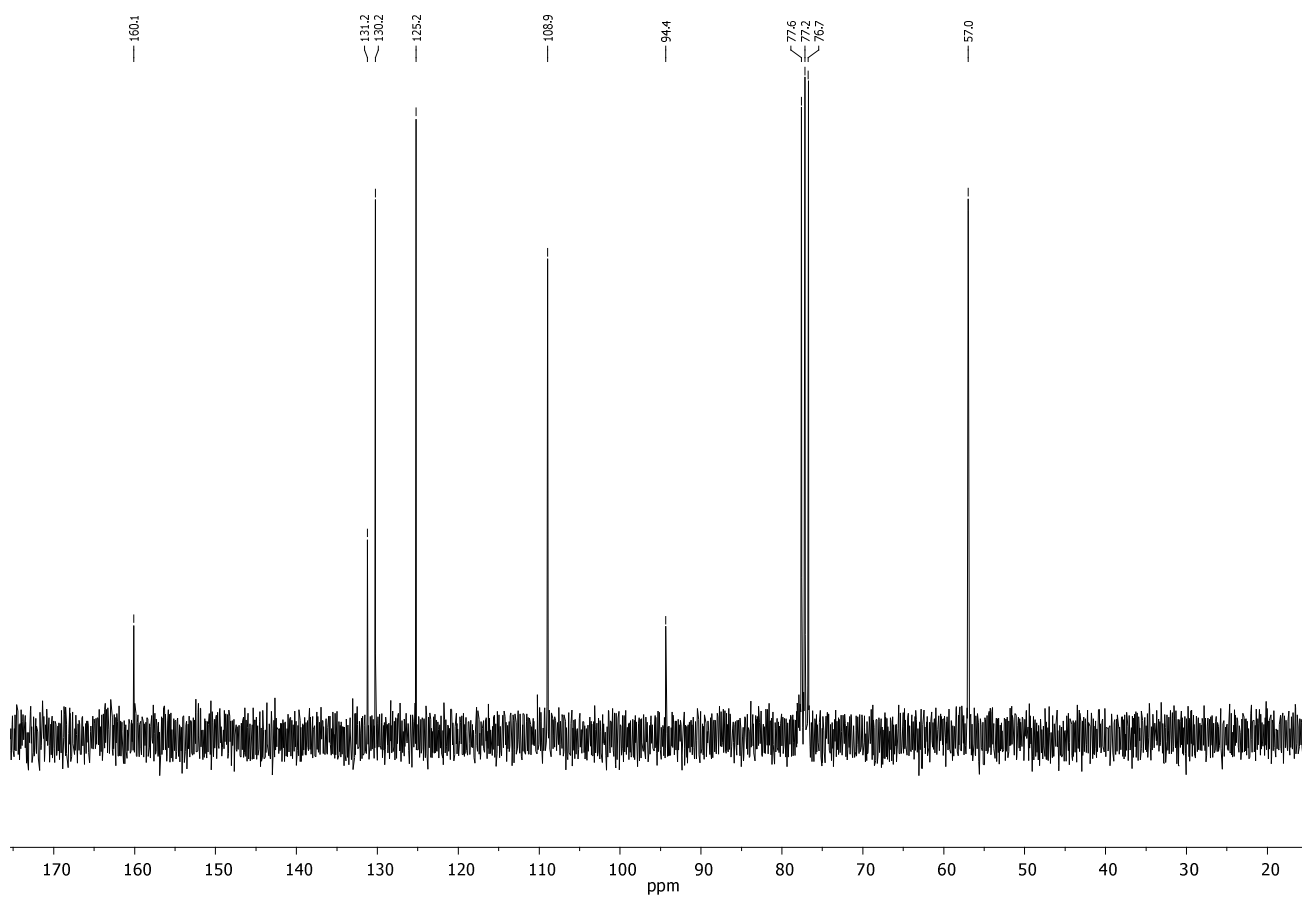

<sup>1</sup>H-NMR (300 MHz, CDCl<sub>3</sub>):

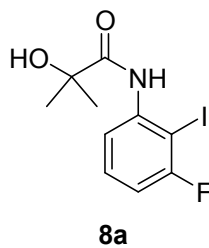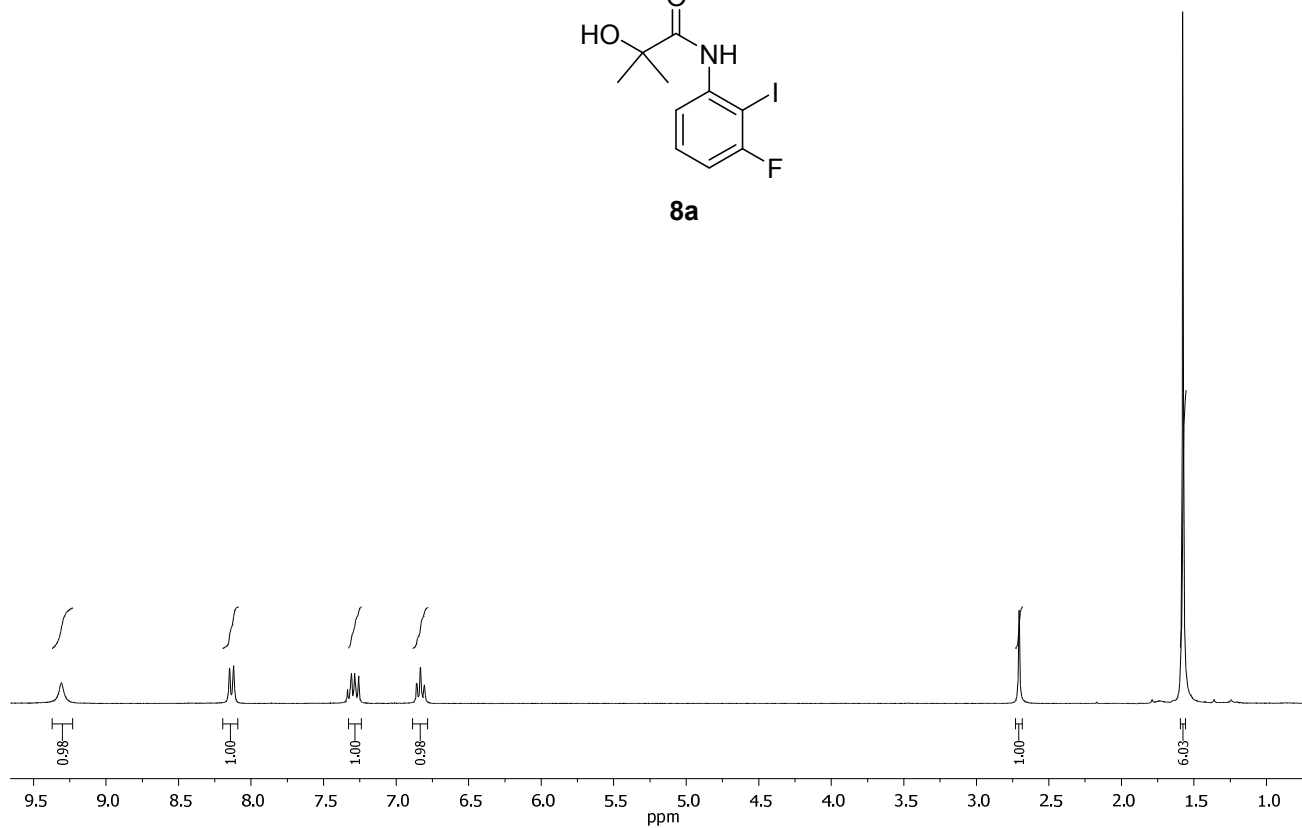

<sup>13</sup>C-NMR (75.4 MHz, CDCl<sub>3</sub>):

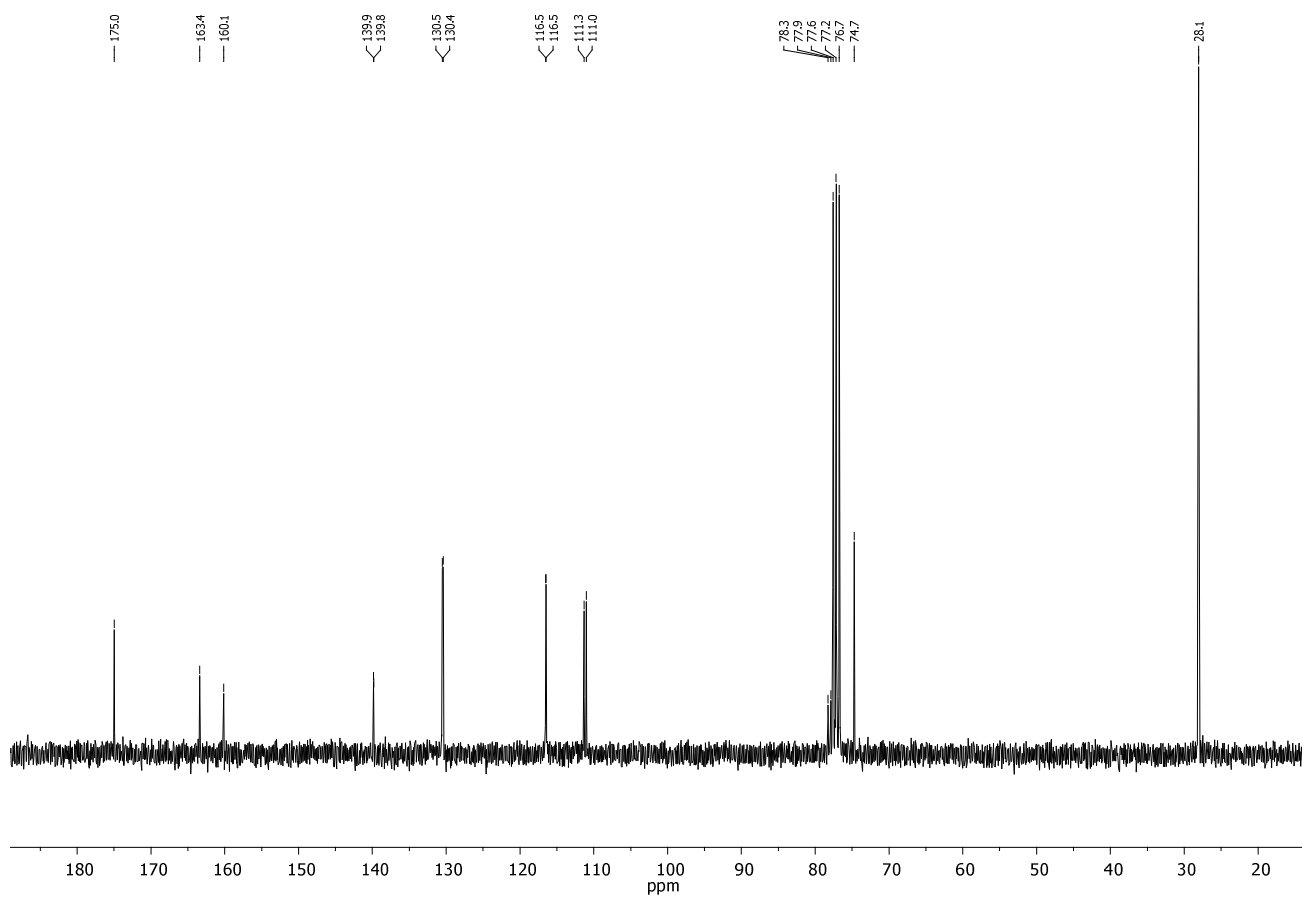



<sup>1</sup>H-NMR (300 MHz, CDCl<sub>3</sub>):

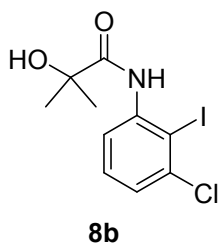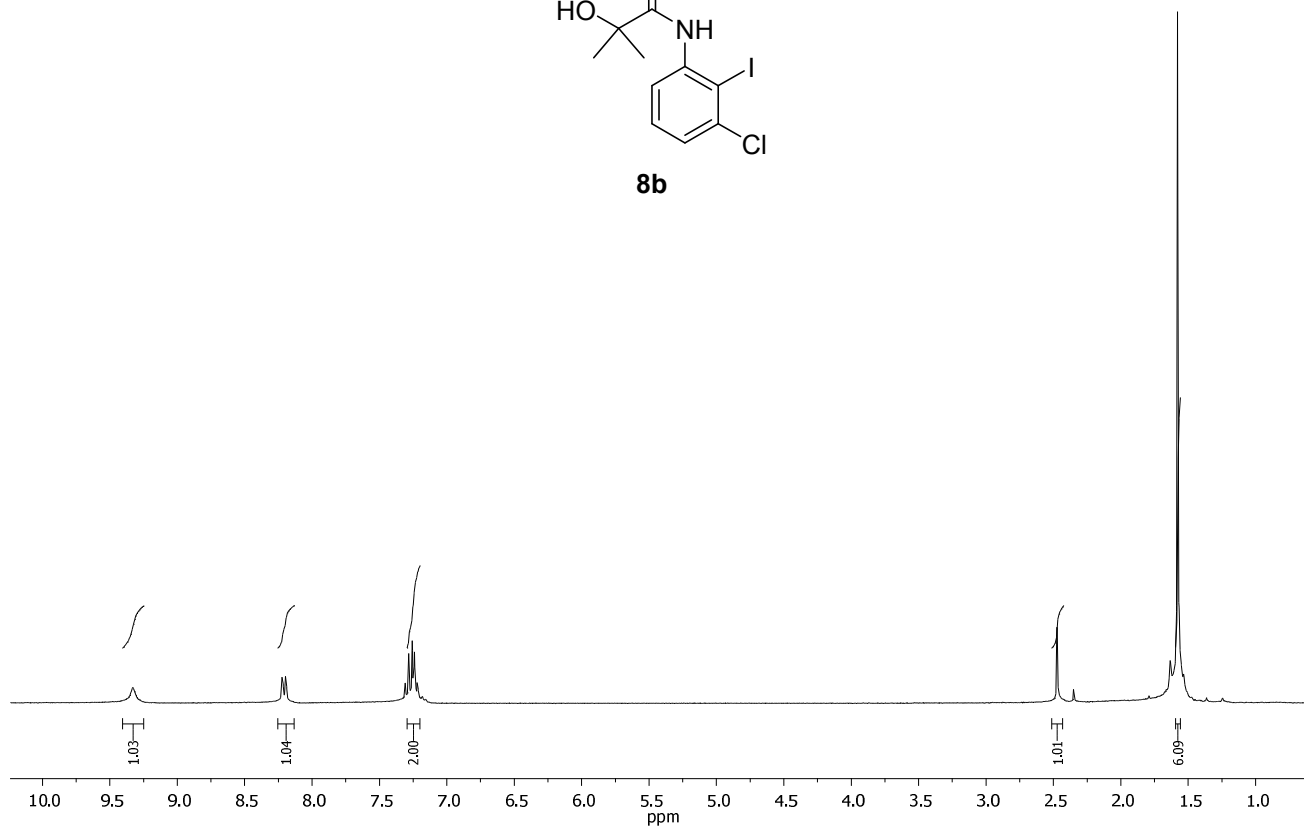

<sup>13</sup>C-NMR (75.4 MHz, CDCl<sub>3</sub>):

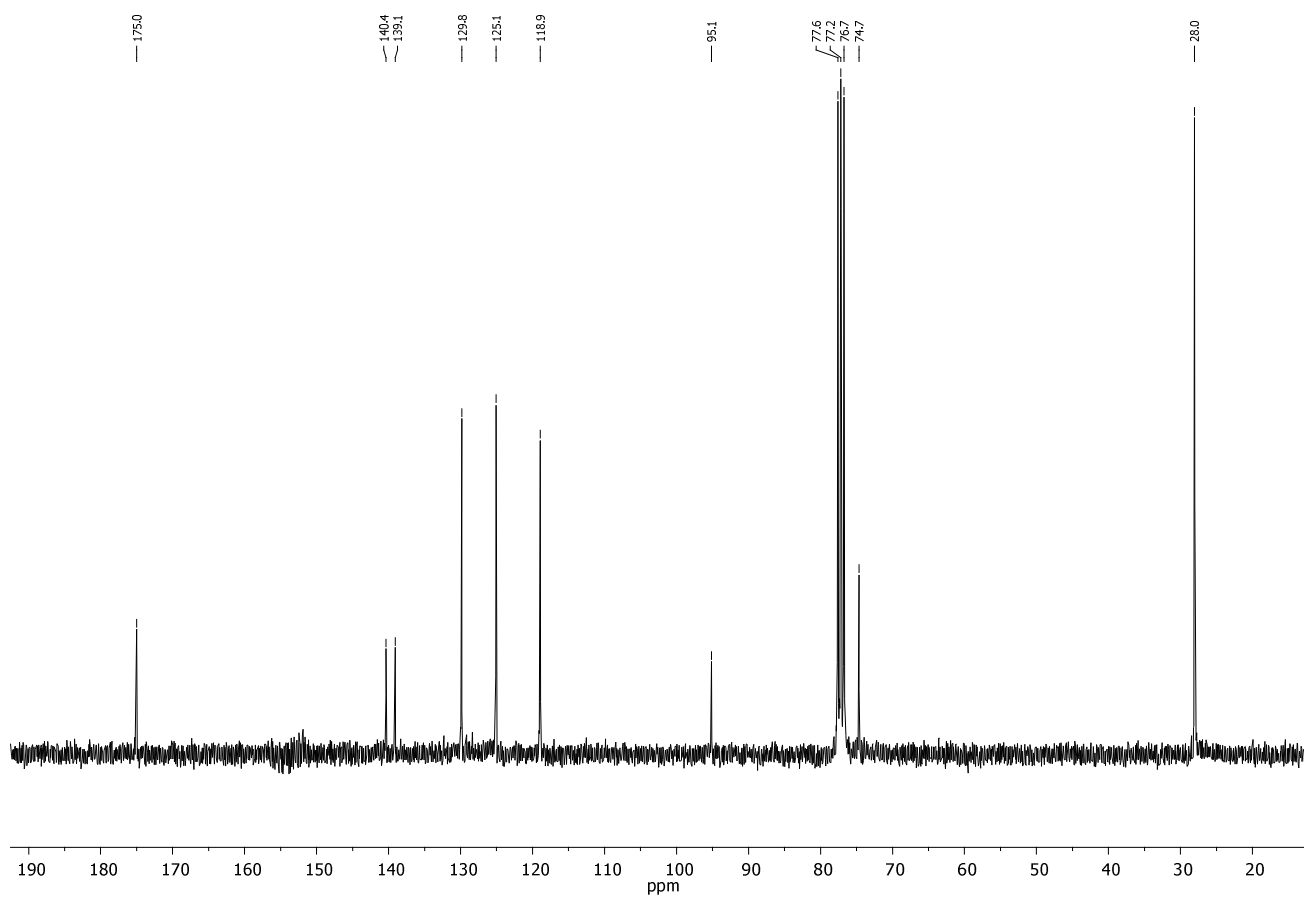

<sup>1</sup>H-NMR (300 MHz, CDCl<sub>3</sub>):

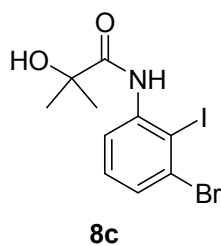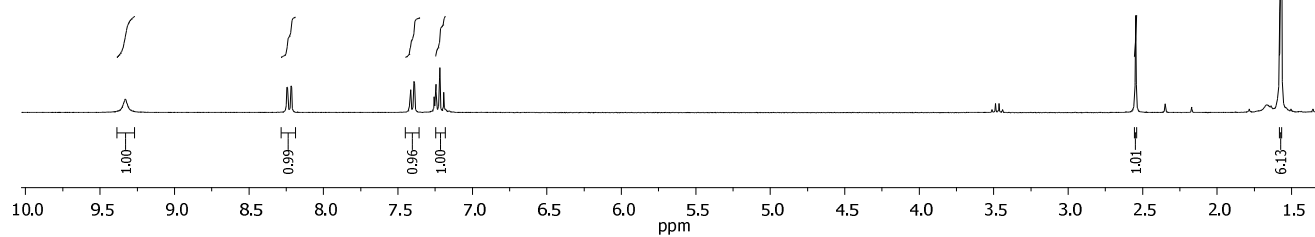

<sup>13</sup>C-NMR (75.4 MHz, CDCl<sub>3</sub>):

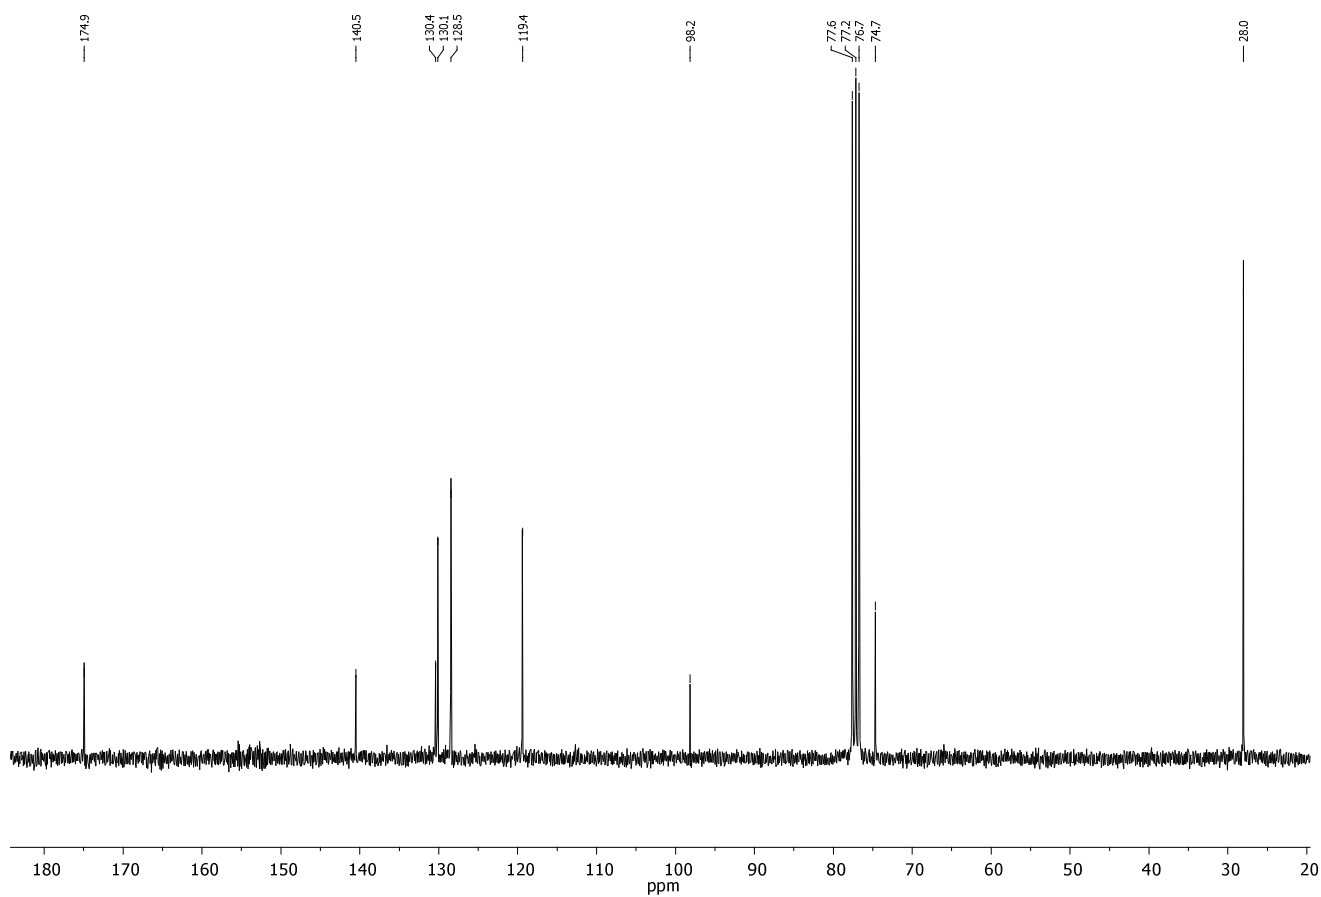

<sup>1</sup>H-NMR (300 MHz, CDCl<sub>3</sub>):

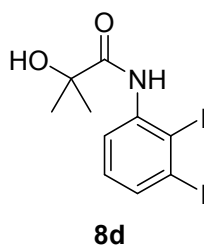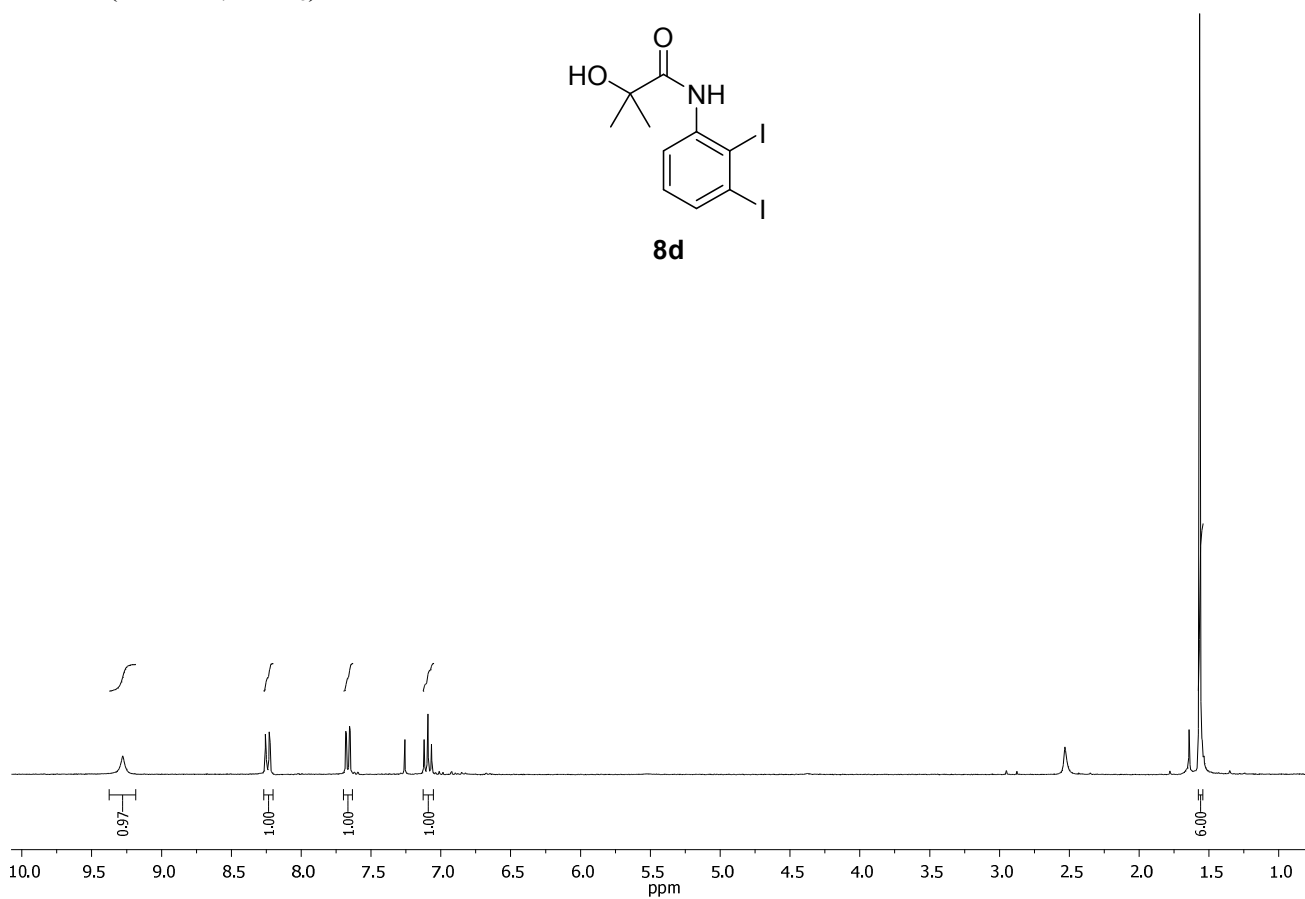

<sup>13</sup>C-NMR (75.4 MHz, CDCl<sub>3</sub>):

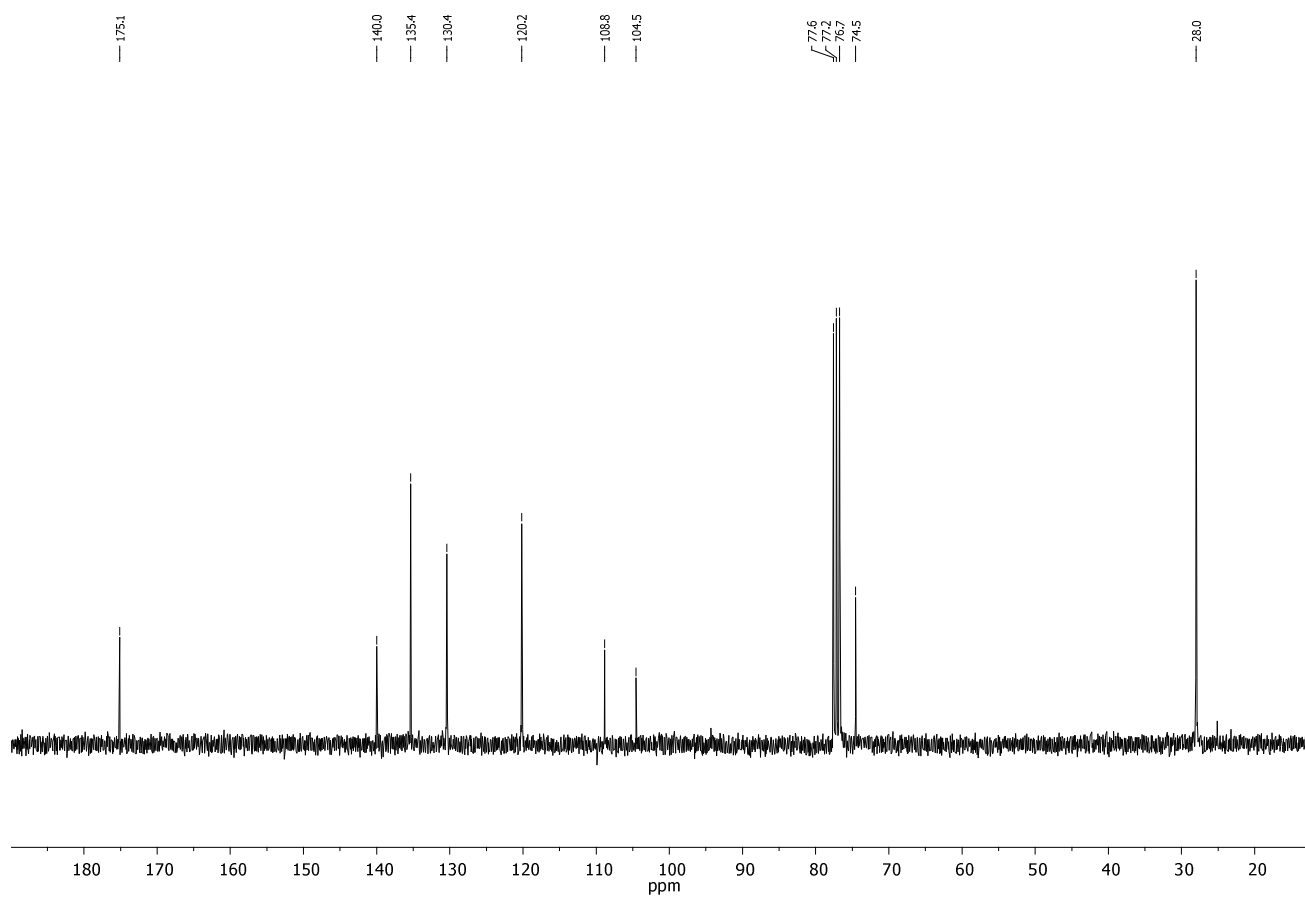

<sup>1</sup>H-NMR (300 MHz, CDCl<sub>3</sub>):

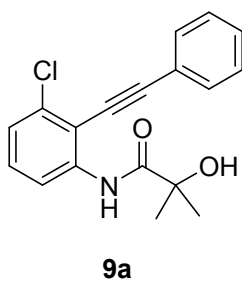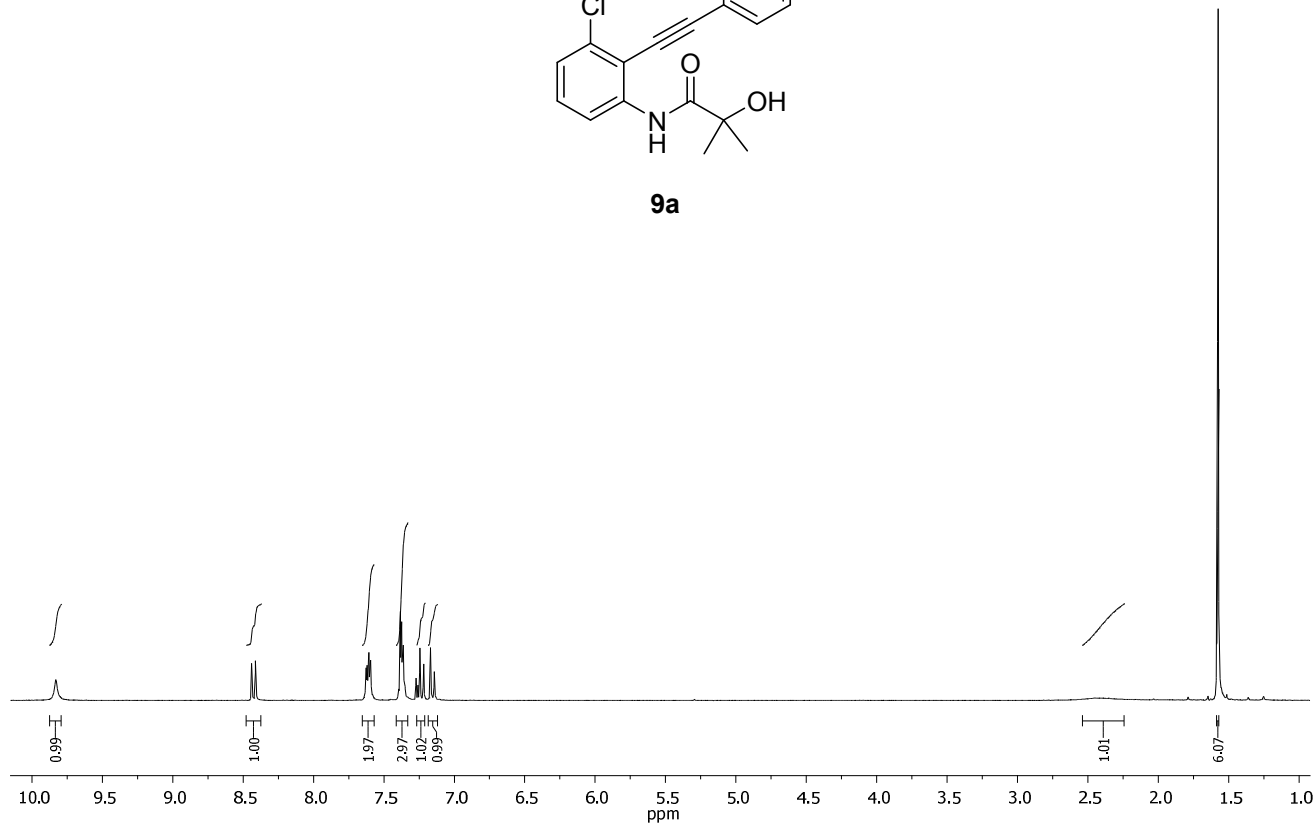

<sup>13</sup>C-NMR (75.4 MHz, CDCl<sub>3</sub>):

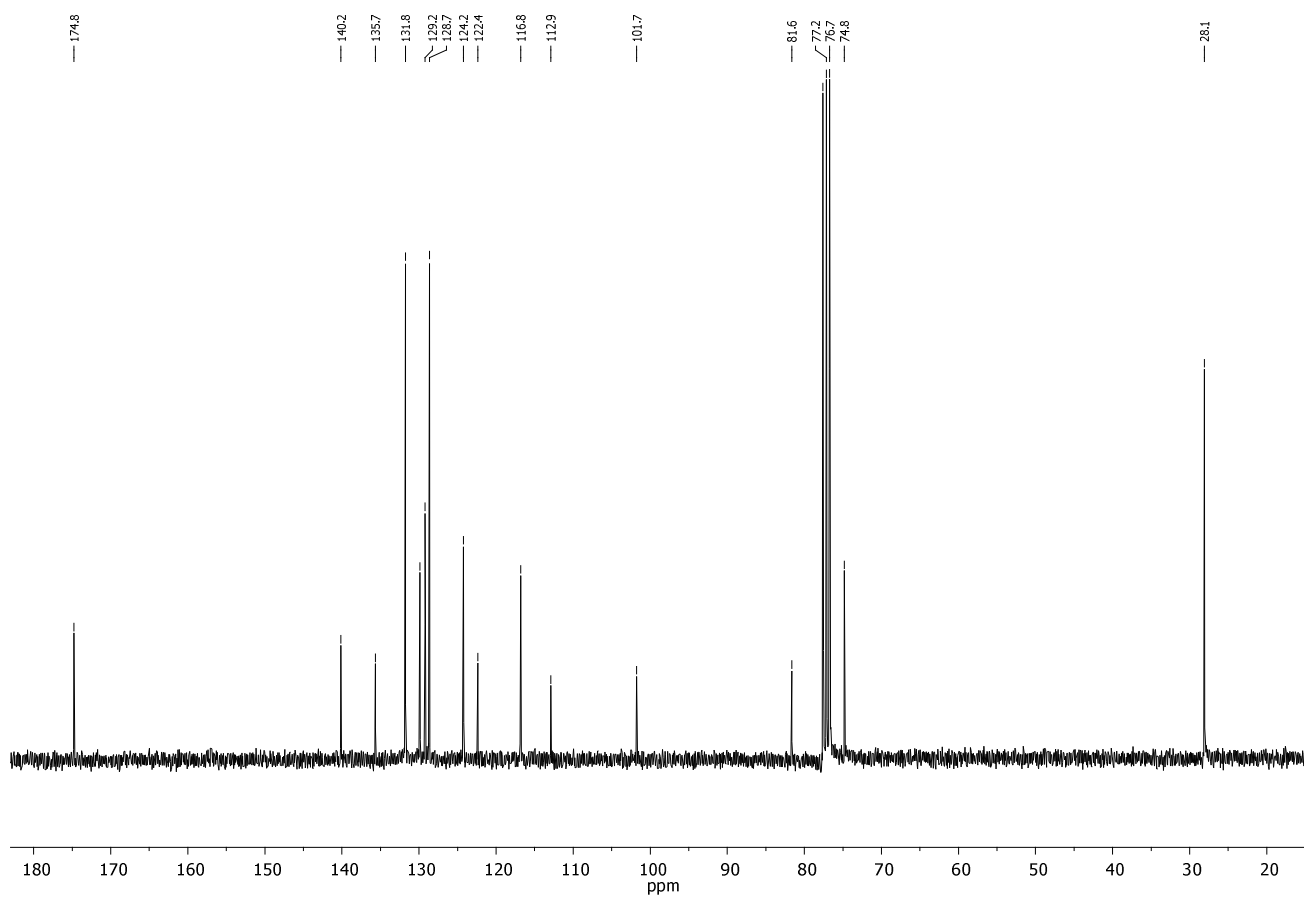

<sup>1</sup>H-NMR (300 MHz, CDCl<sub>3</sub>):

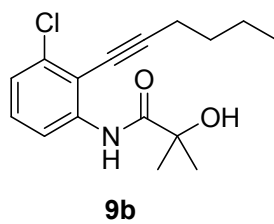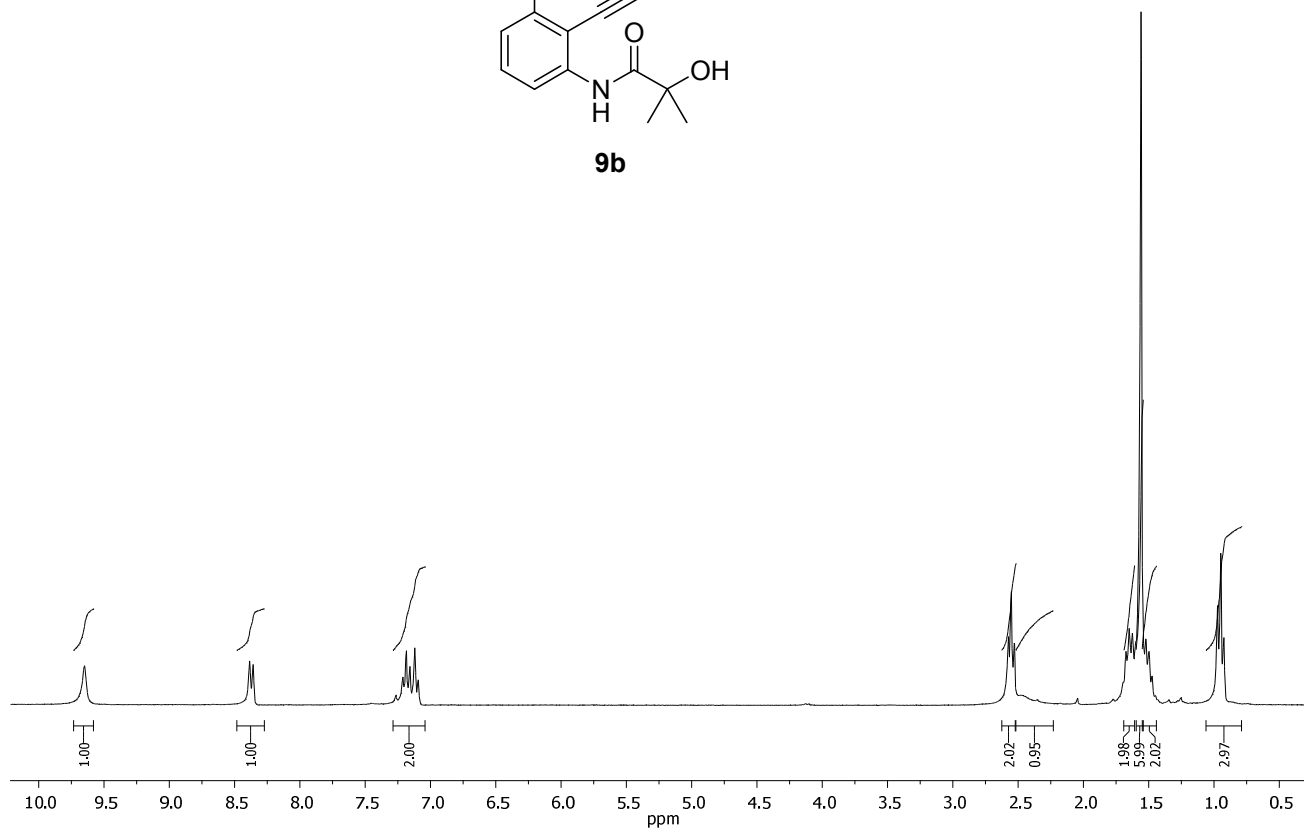

<sup>13</sup>C-NMR (75.4 MHz, CDCl<sub>3</sub>):

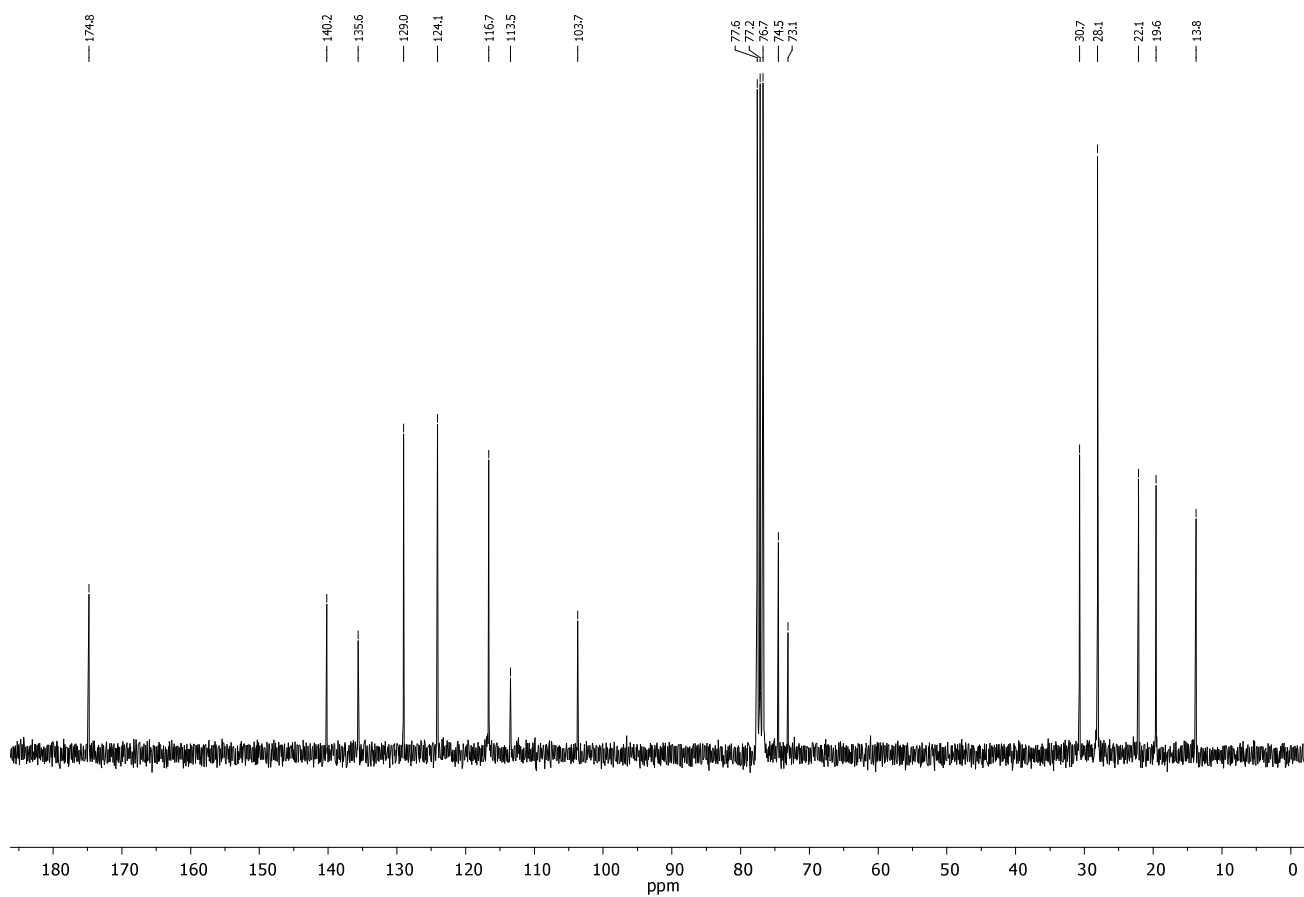

$^1\text{H}$ -NMR (300 MHz,  $\text{CDCl}_3$ ):

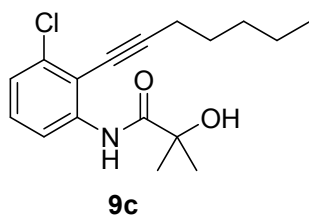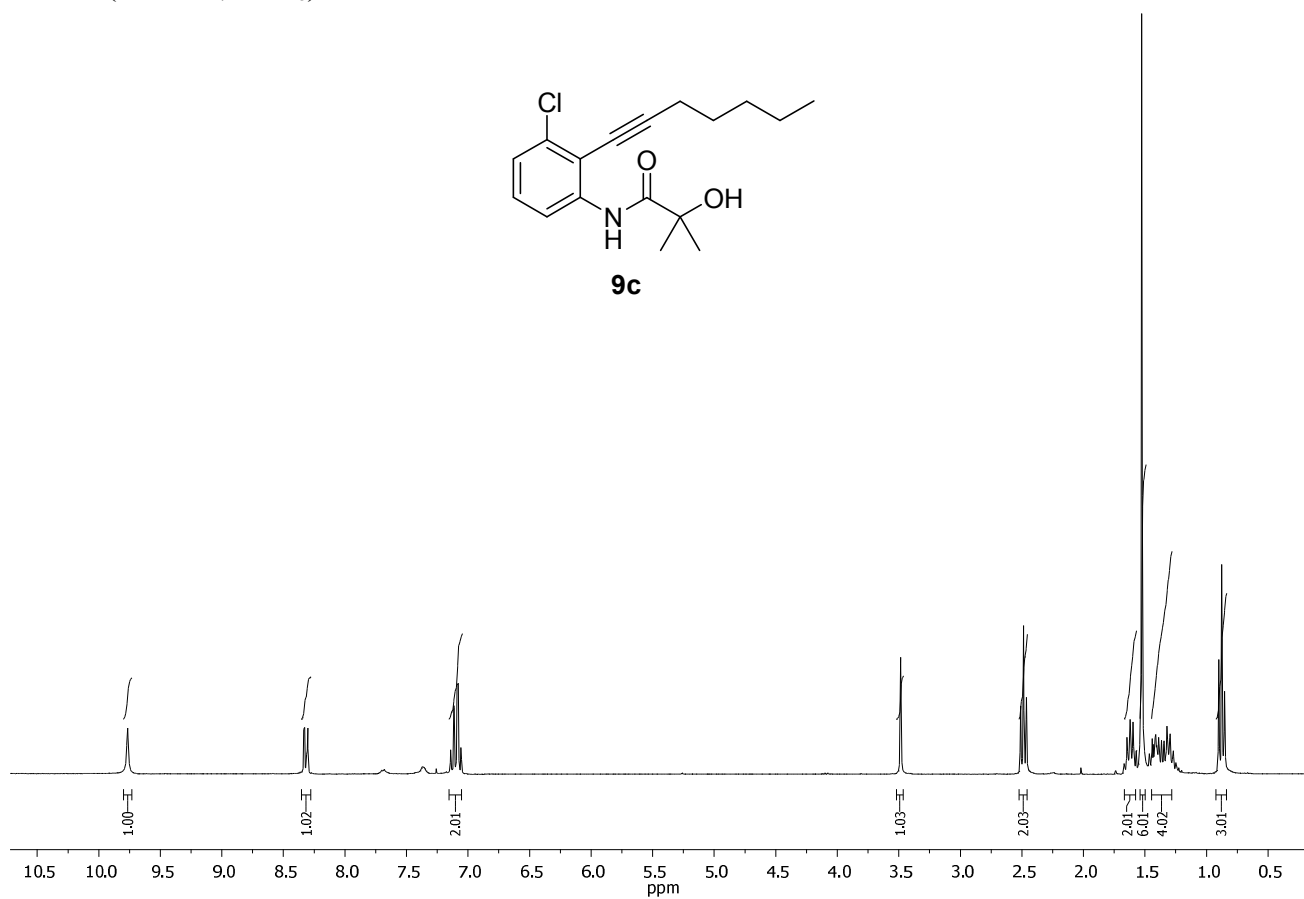

$^{13}\text{C}$ -NMR (75.4 MHz,  $\text{CDCl}_3$ ):

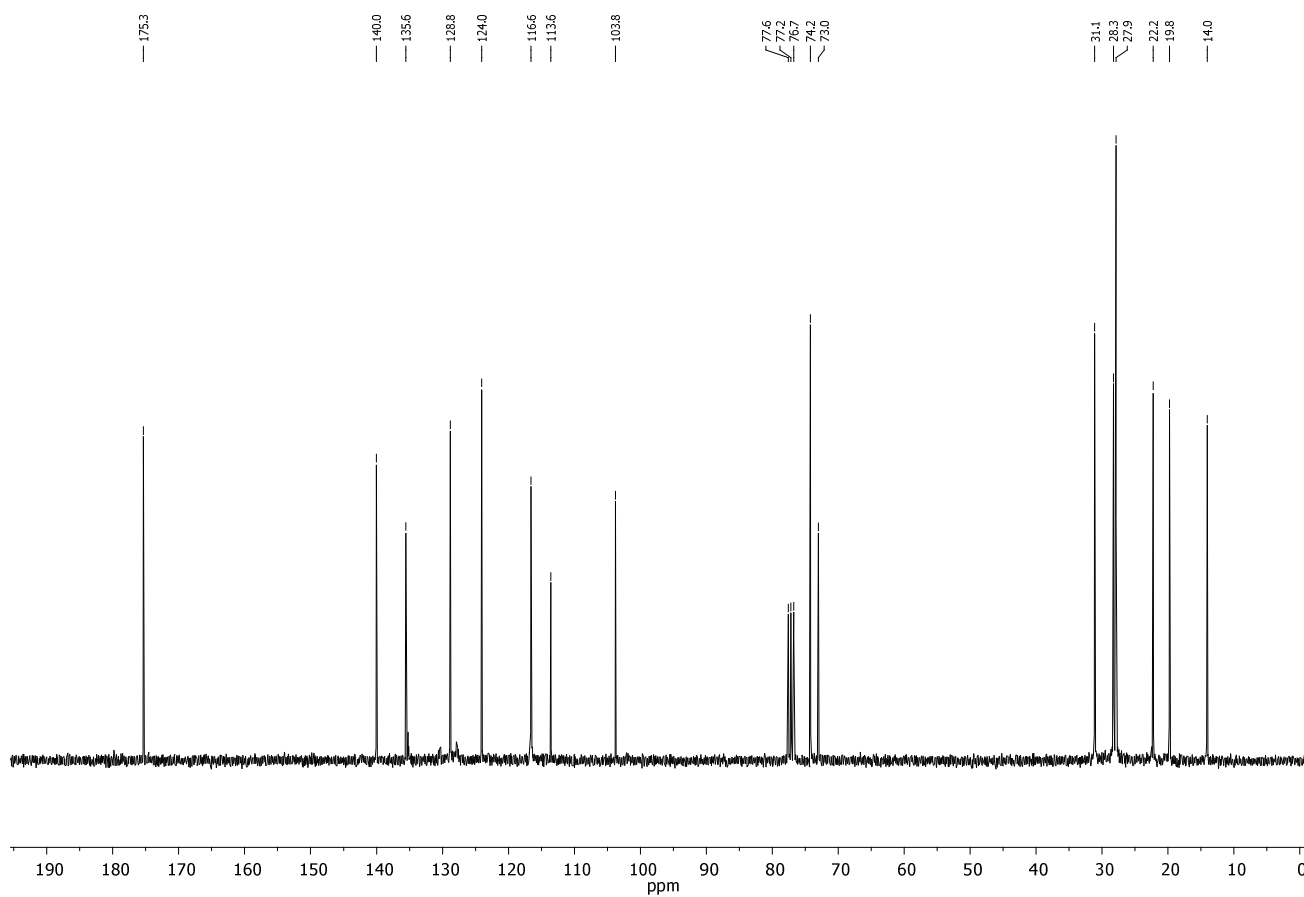

<sup>1</sup>H-NMR (300 MHz, CDCl<sub>3</sub>):

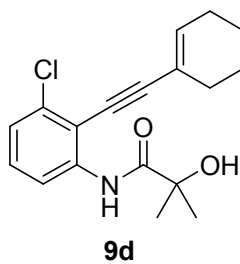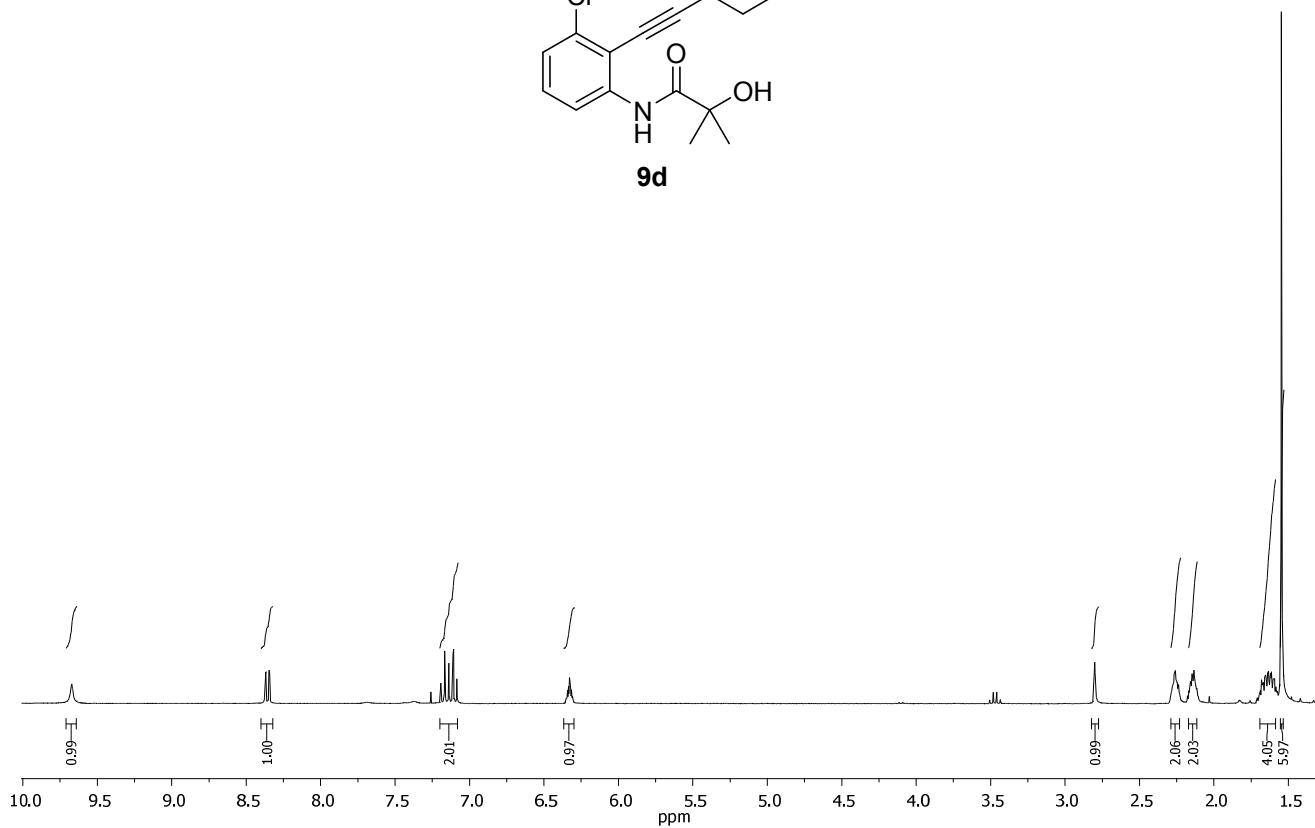

<sup>13</sup>C-NMR (75.4 MHz, CDCl<sub>3</sub>):

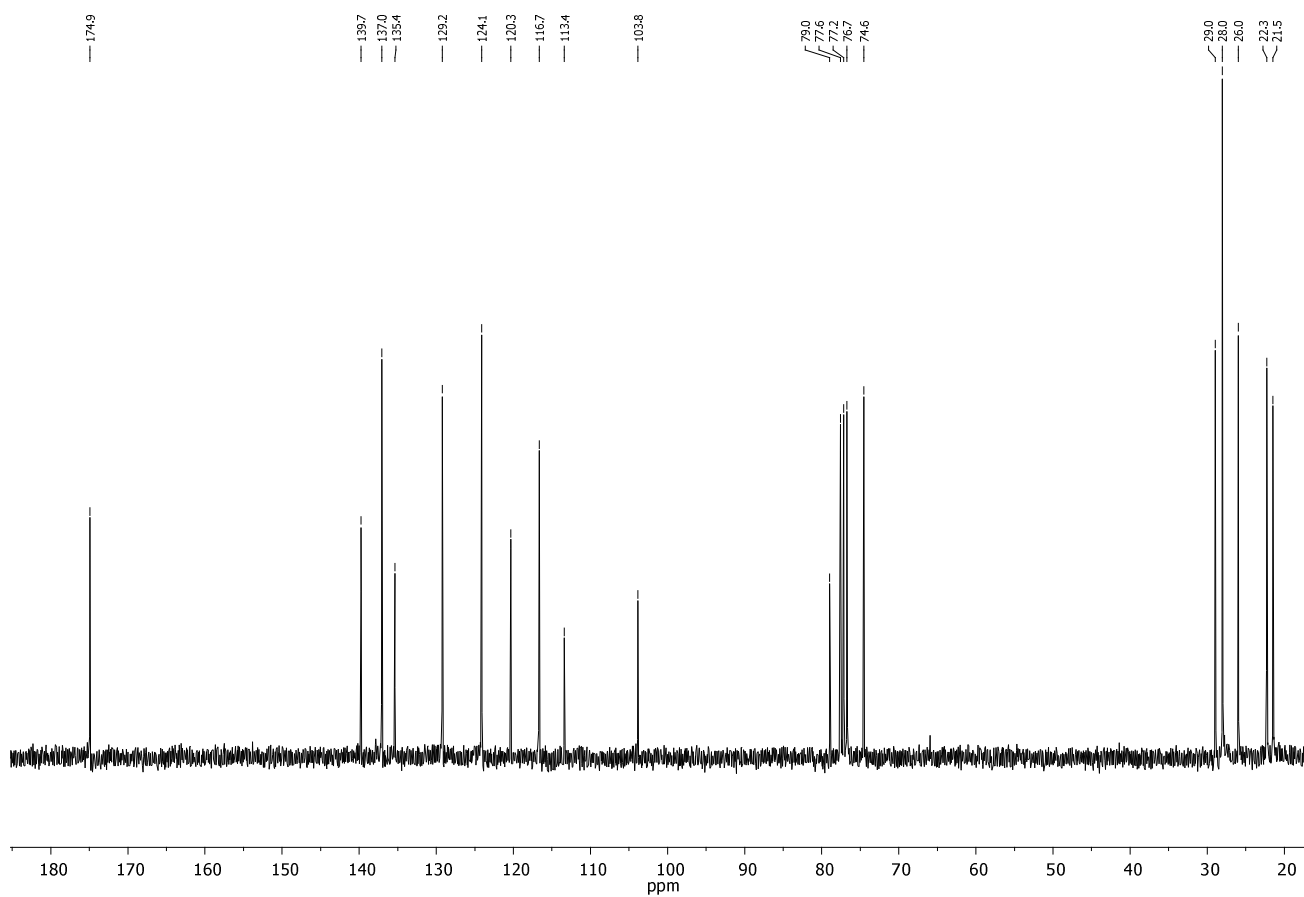

<sup>1</sup>H-NMR (300 MHz, CDCl<sub>3</sub>):

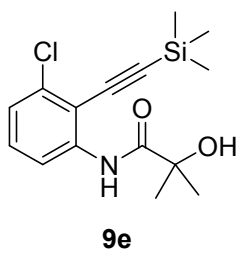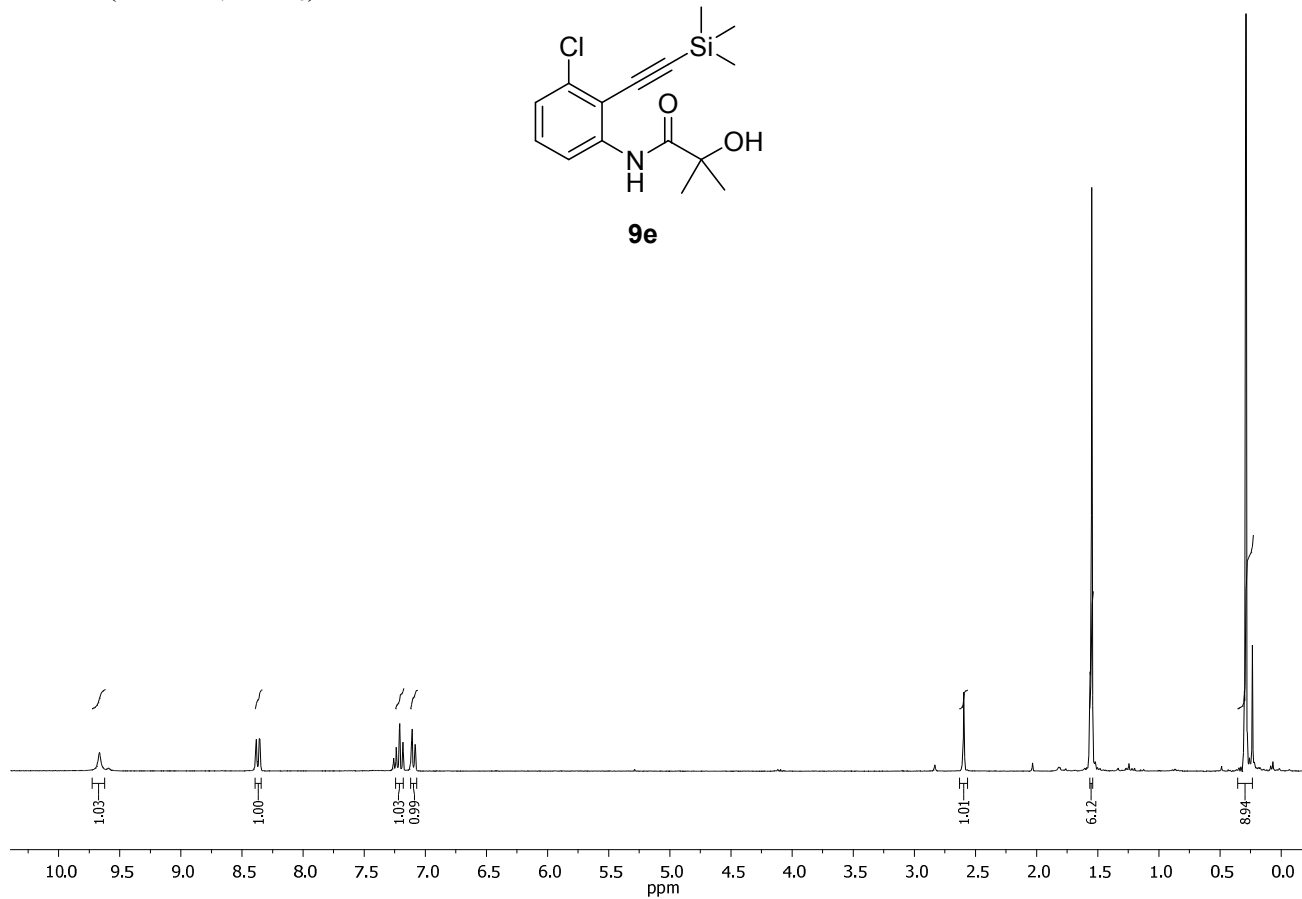

<sup>13</sup>C-NMR (75.4 MHz, CDCl<sub>3</sub>):

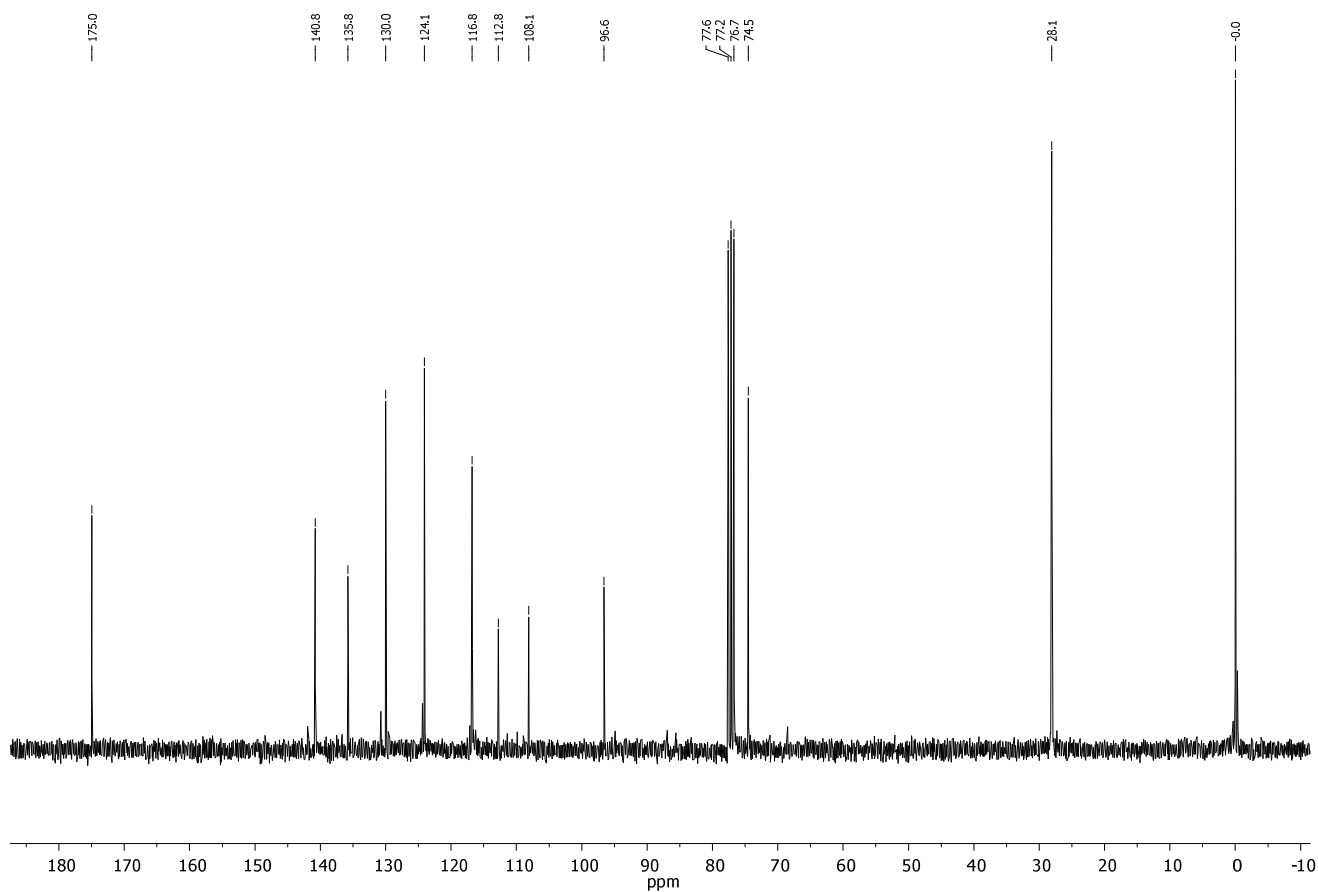



<sup>1</sup>H-NMR (300 MHz, CDCl<sub>3</sub>):

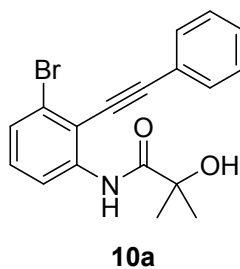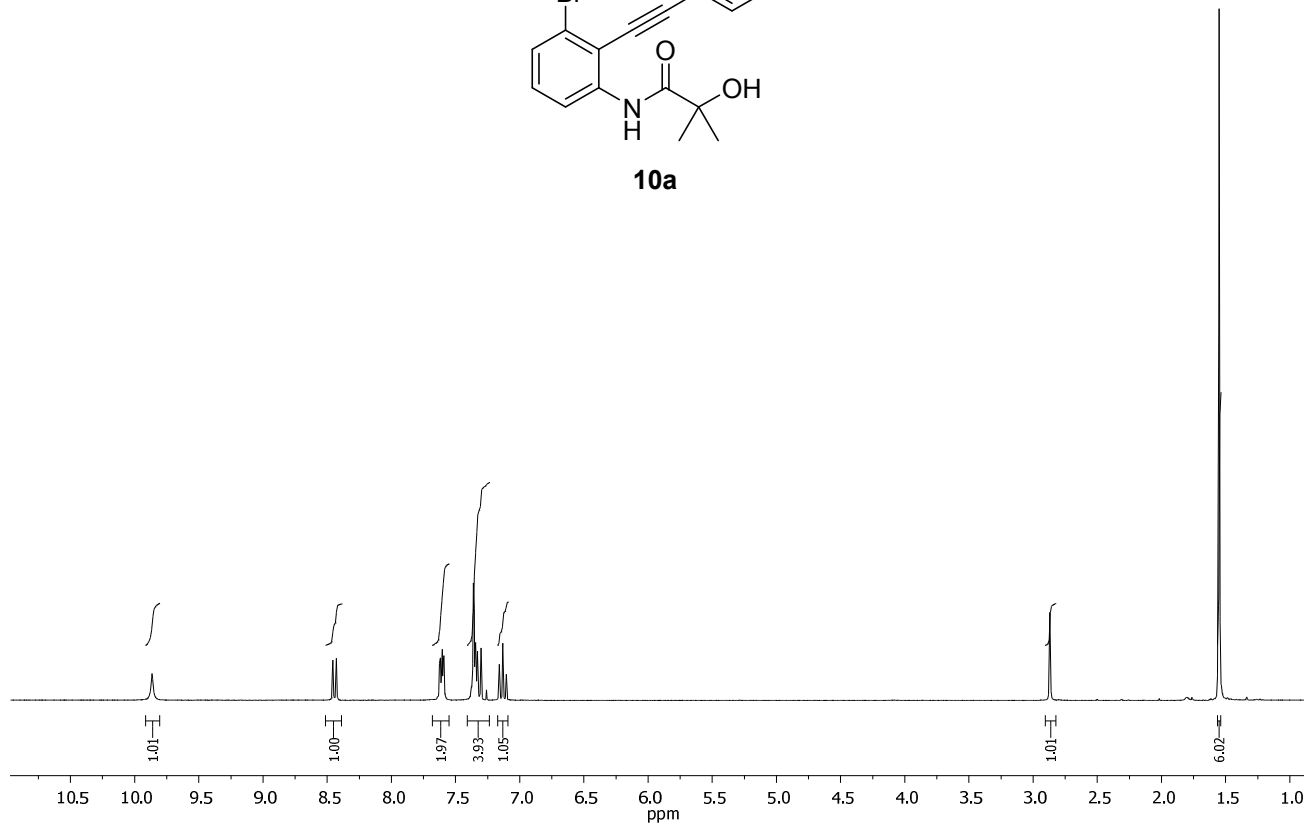

<sup>13</sup>C-NMR (75.4 MHz, CDCl<sub>3</sub>):

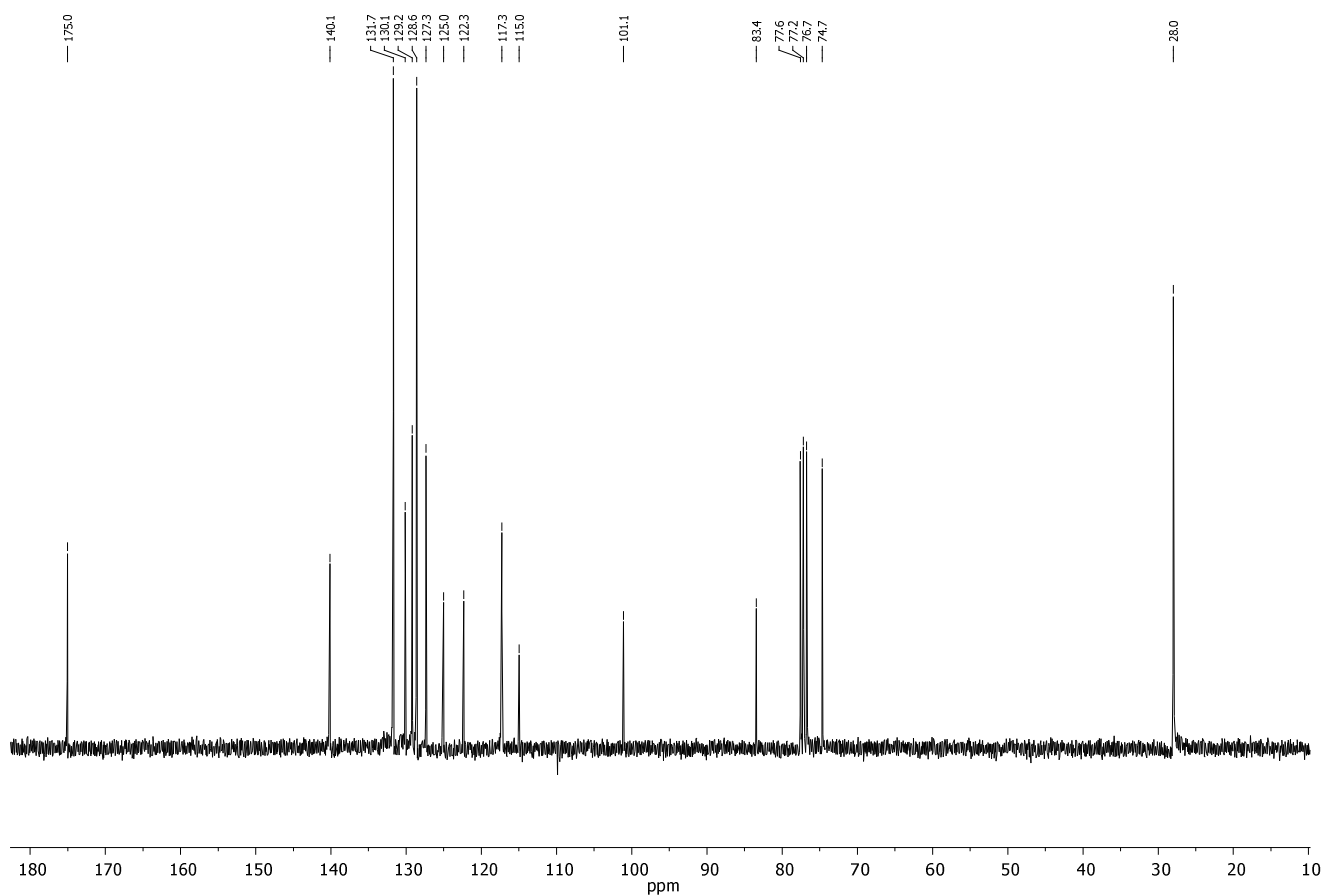

$^1\text{H-NMR}$  (300 MHz,  $\text{CDCl}_3$ ):

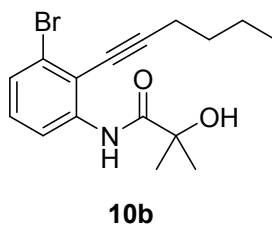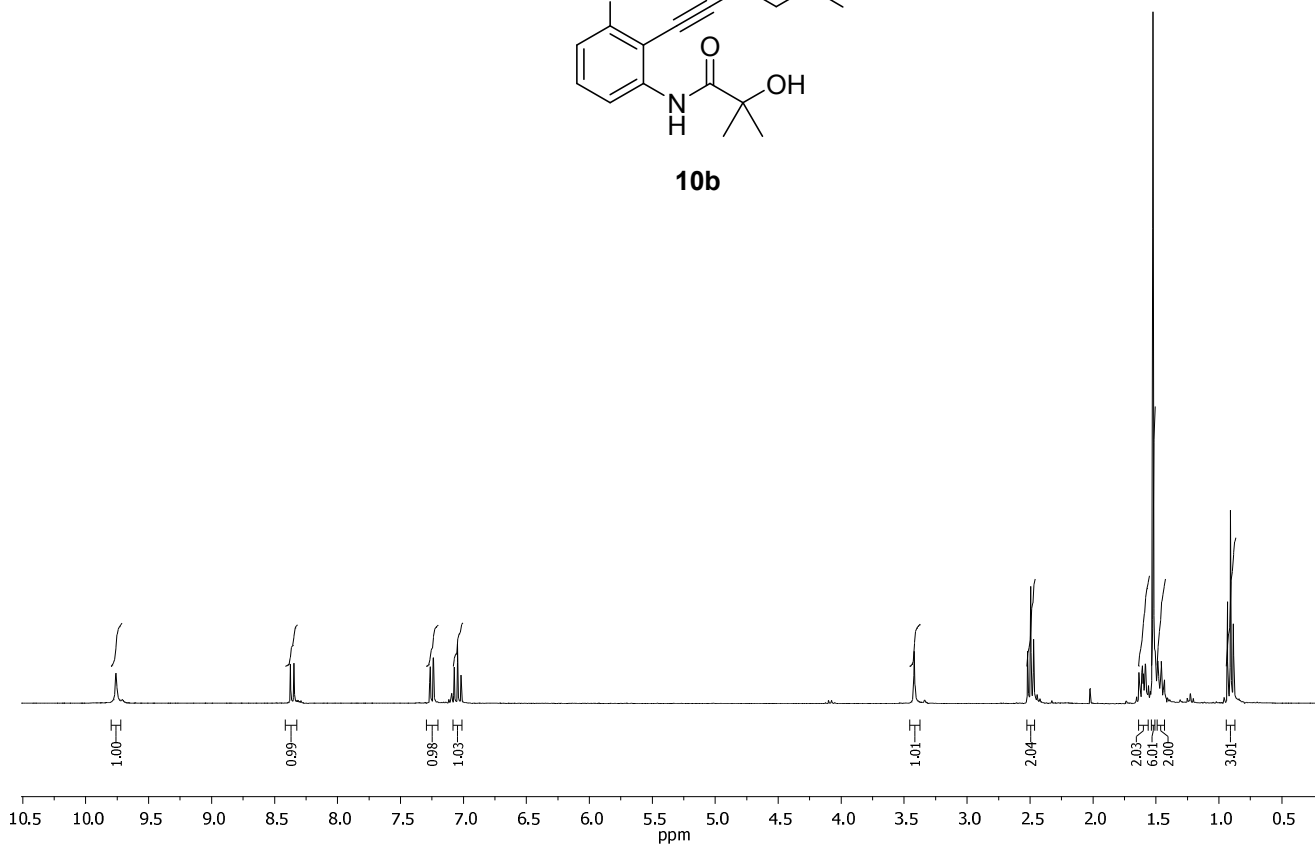

$^{13}\text{C-NMR}$  (75.4 MHz,  $\text{CDCl}_3$ ):

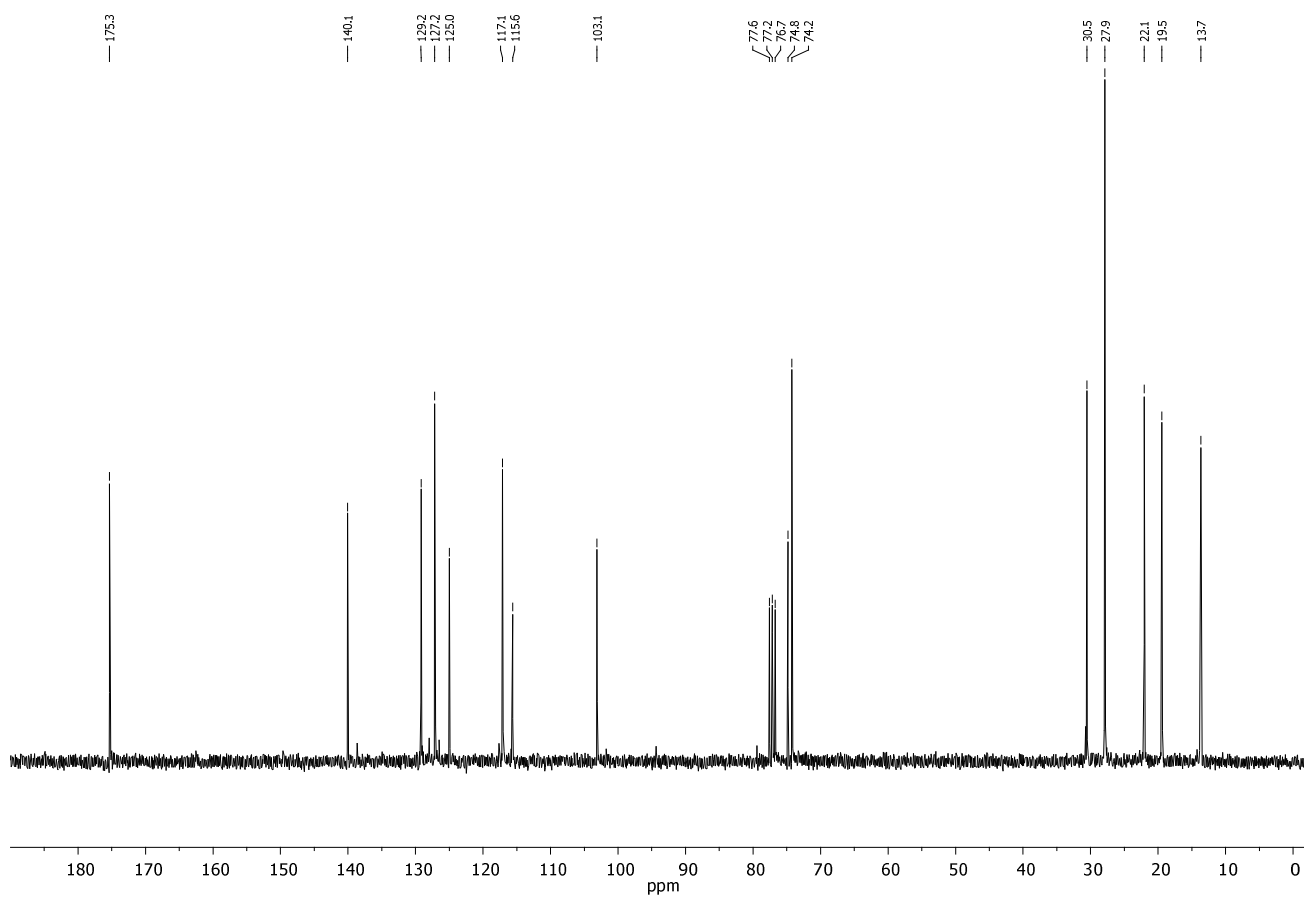

<sup>1</sup>H-NMR (300 MHz, CDCl<sub>3</sub>):

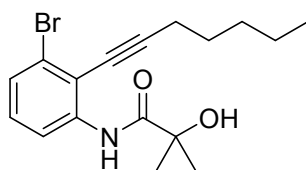

**10c**

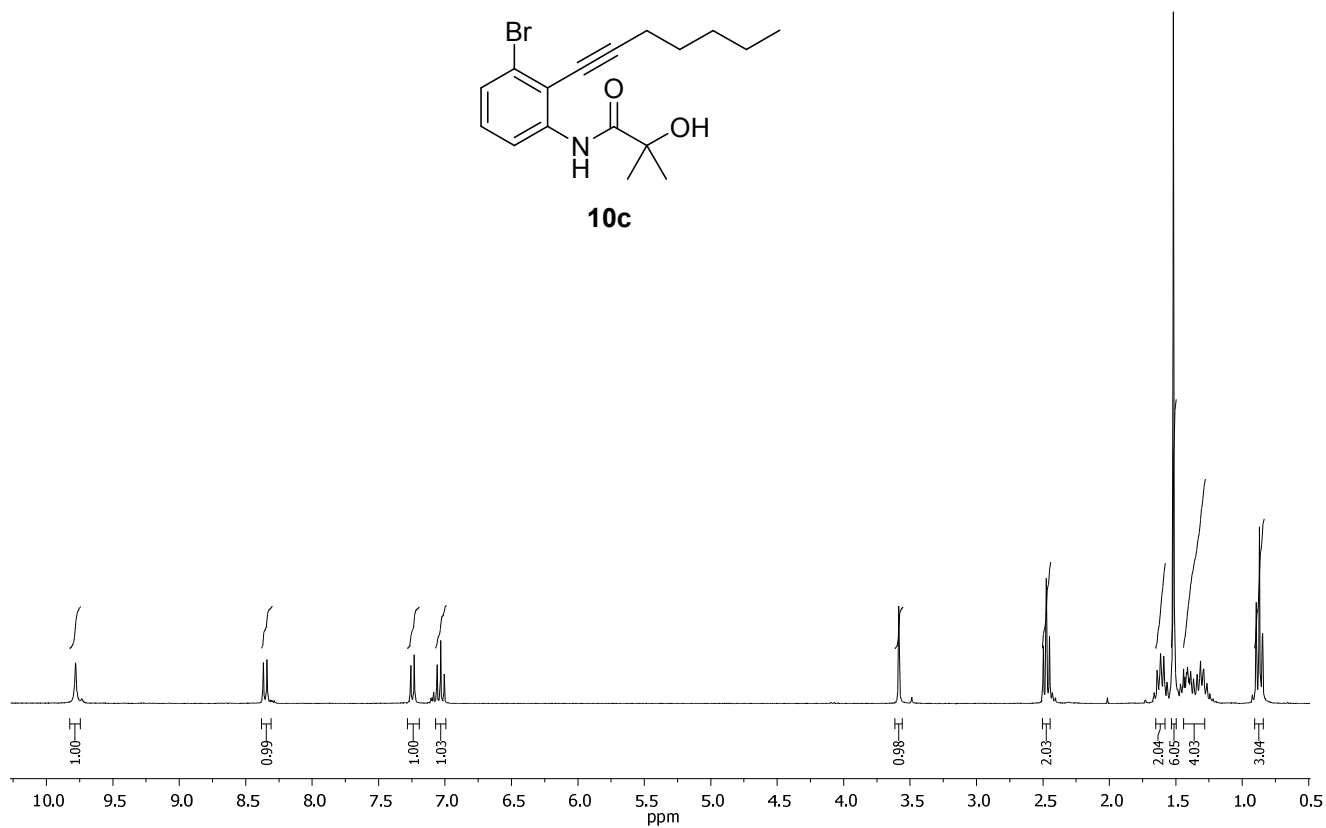

<sup>13</sup>C-NMR (75.4 MHz, CDCl<sub>3</sub>):

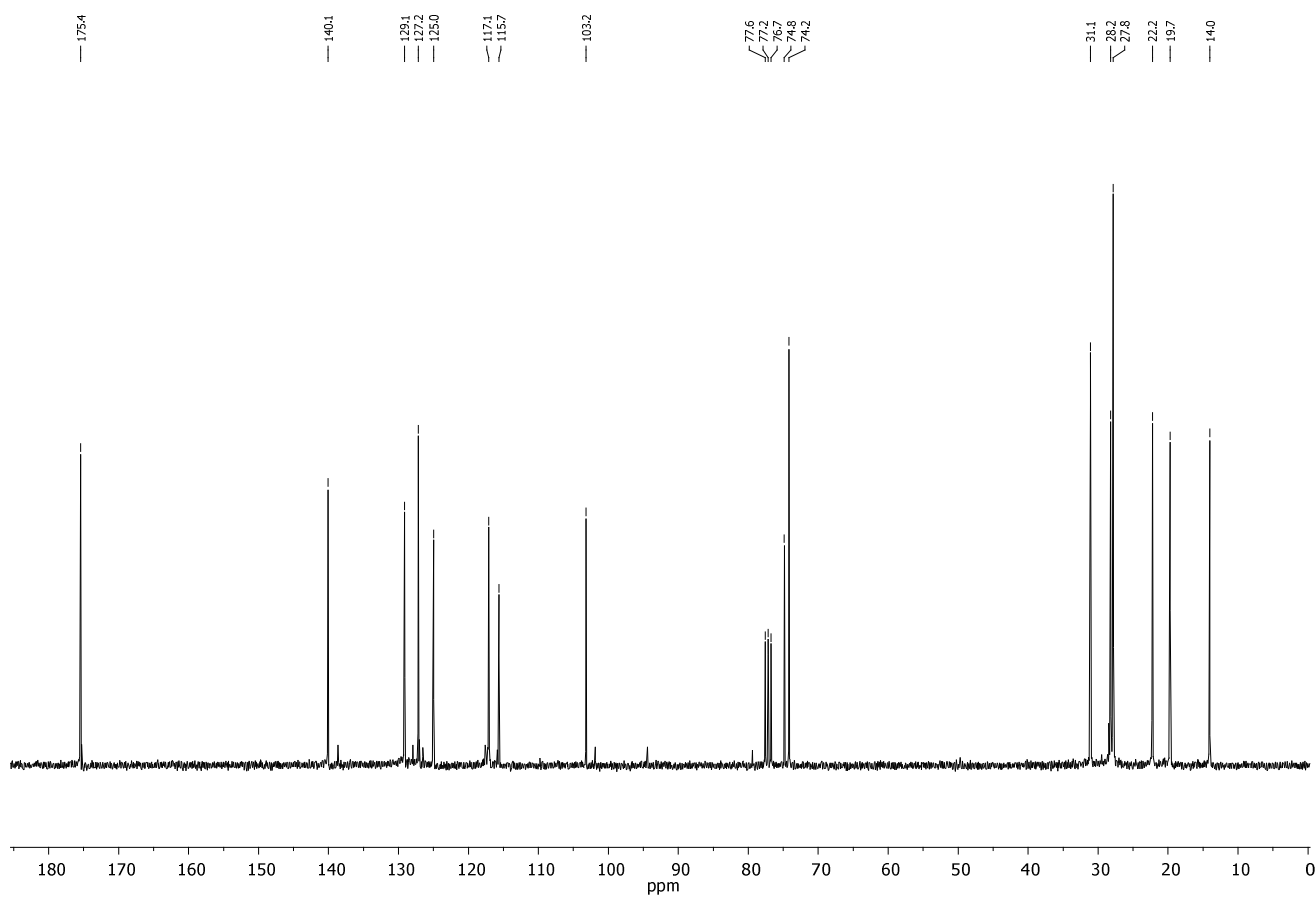

$^1\text{H}$ -NMR (300 MHz,  $\text{CDCl}_3$ ):

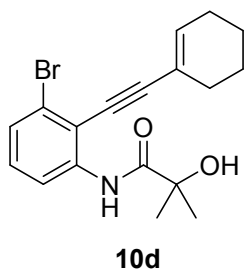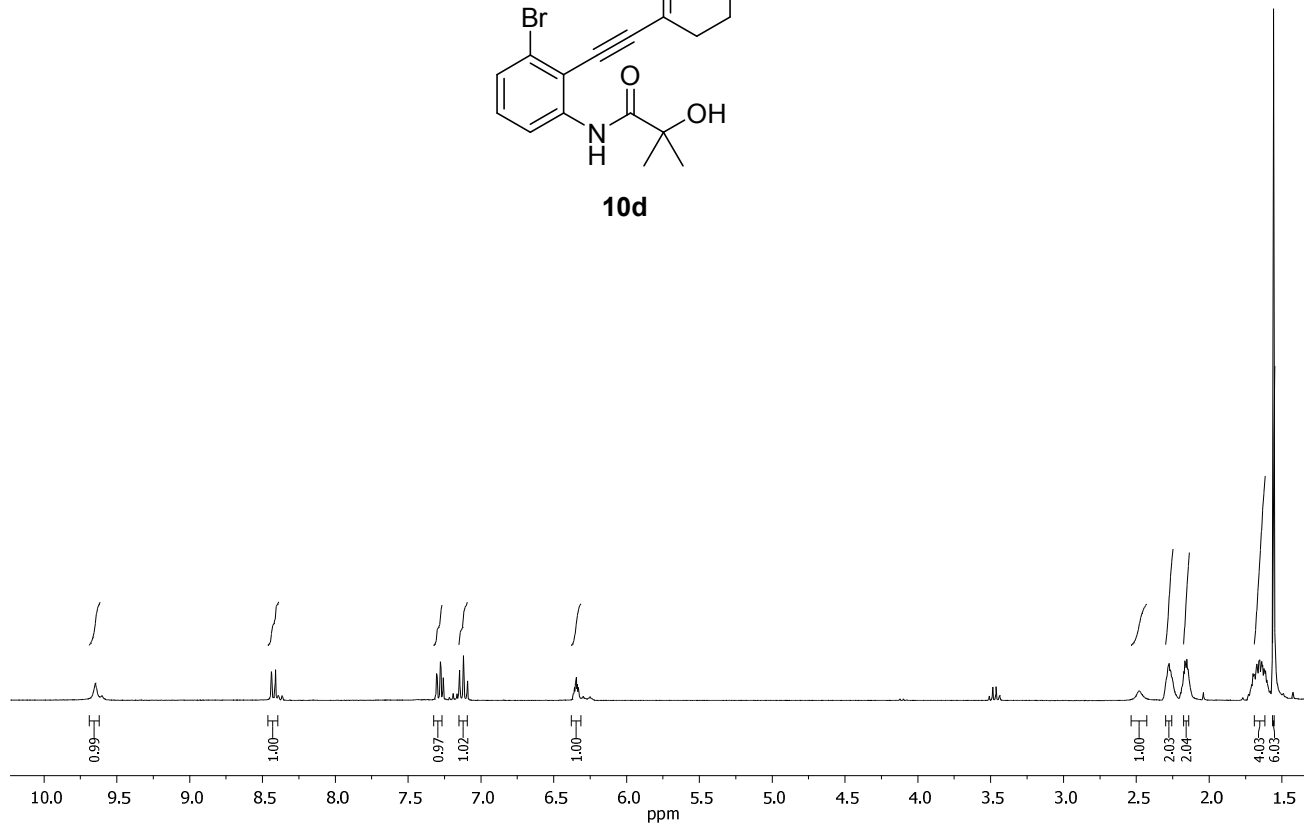

$^{13}\text{C}$ -NMR (75.4 MHz,  $\text{CDCl}_3$ ):

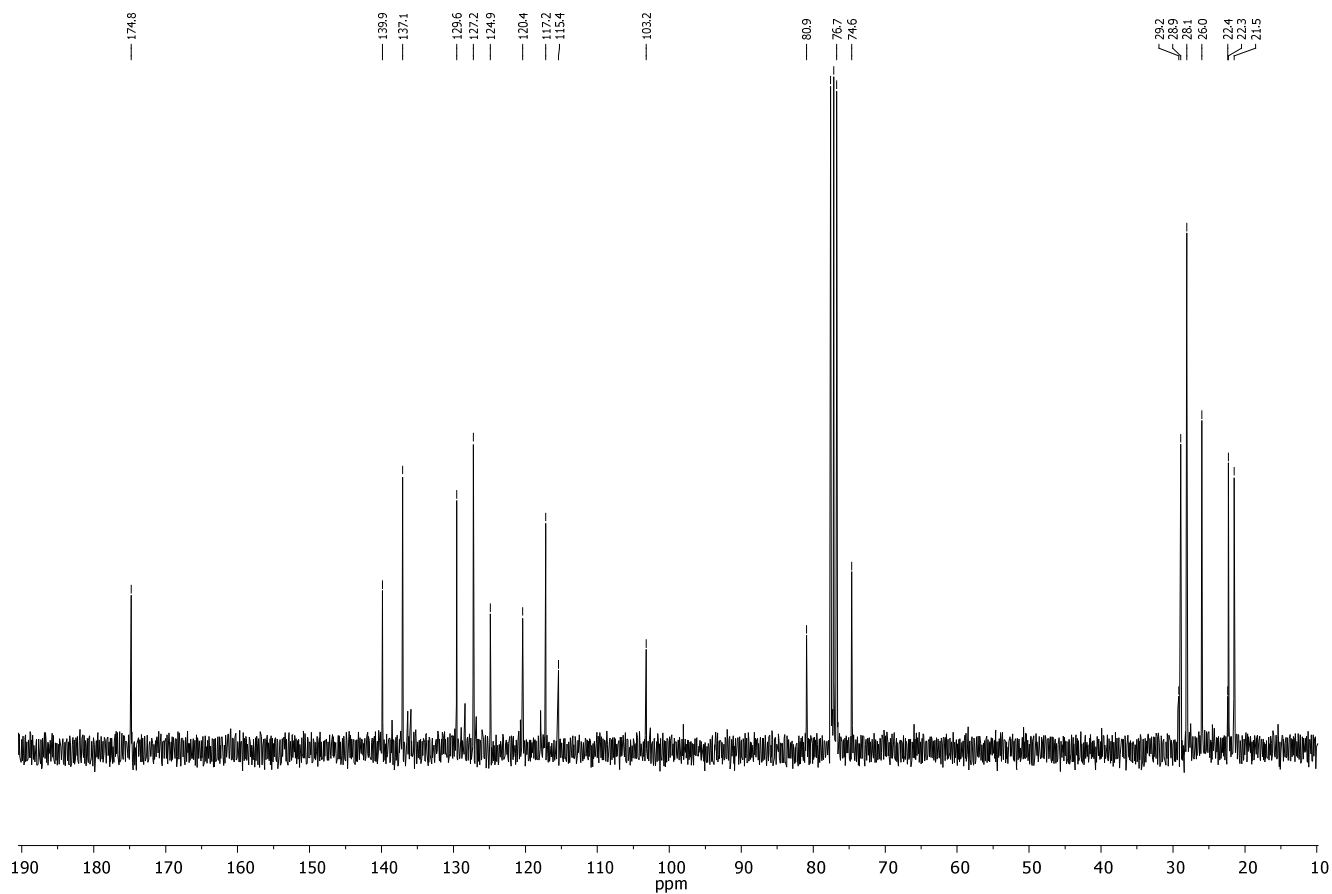

<sup>1</sup>H-NMR (300 MHz, CDCl<sub>3</sub>):

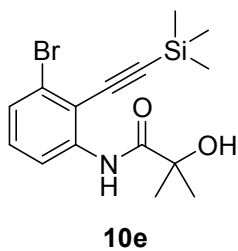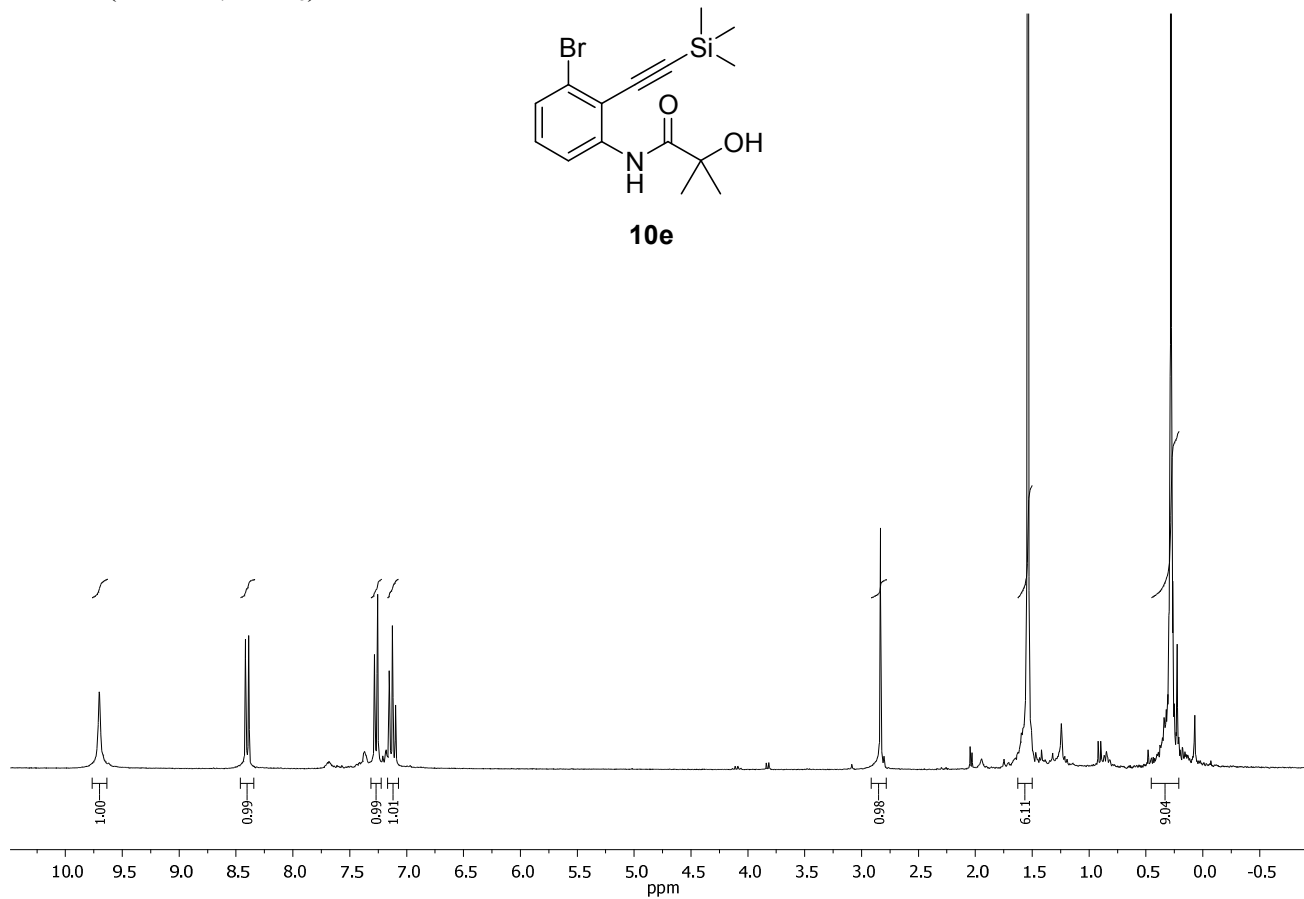

<sup>13</sup>C-NMR (75.4 MHz, CDCl<sub>3</sub>):

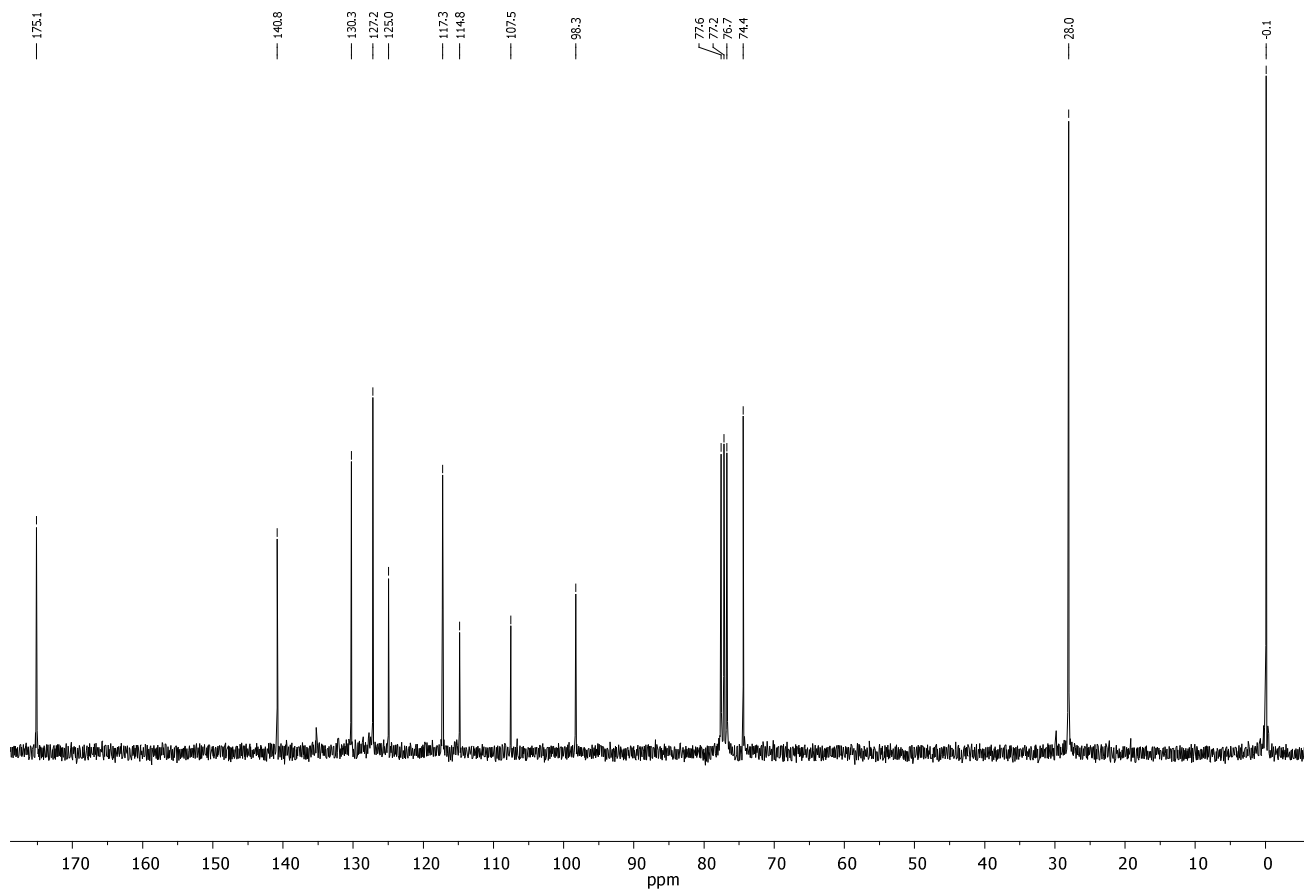

$^1\text{H-NMR}$  (400 MHz,  $\text{CDCl}_3$ ):

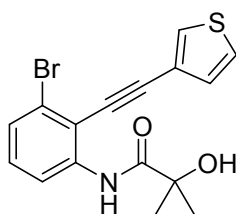

**10f**

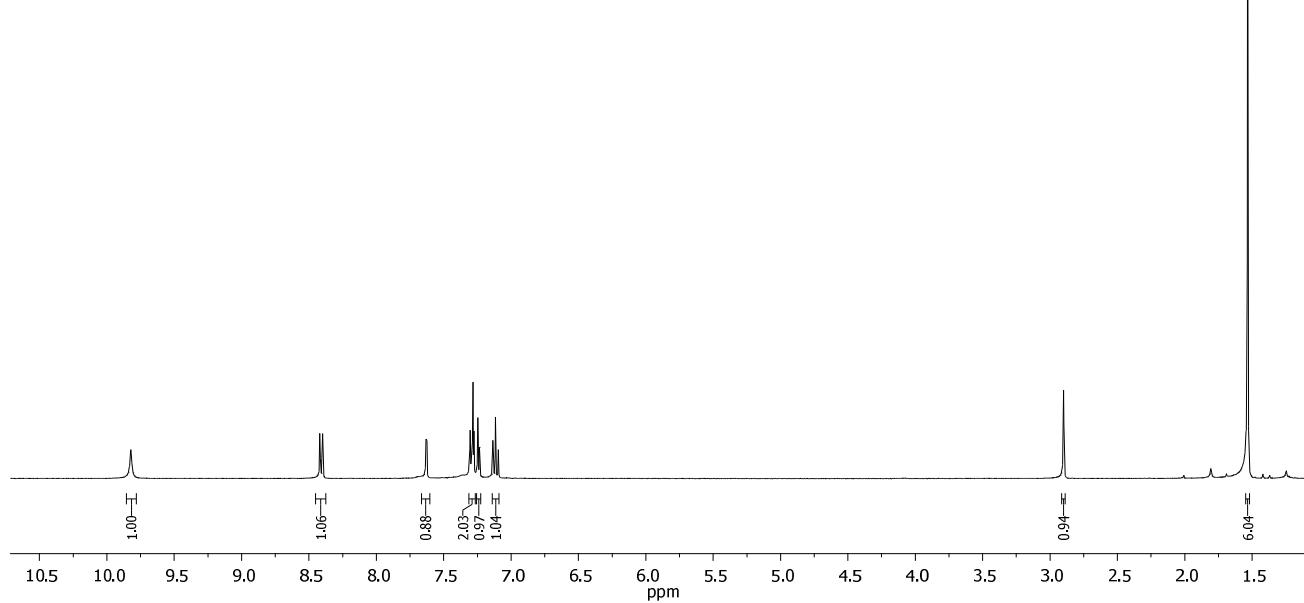

$^{13}\text{C-NMR}$  (100.6 MHz,  $\text{CDCl}_3$ ):

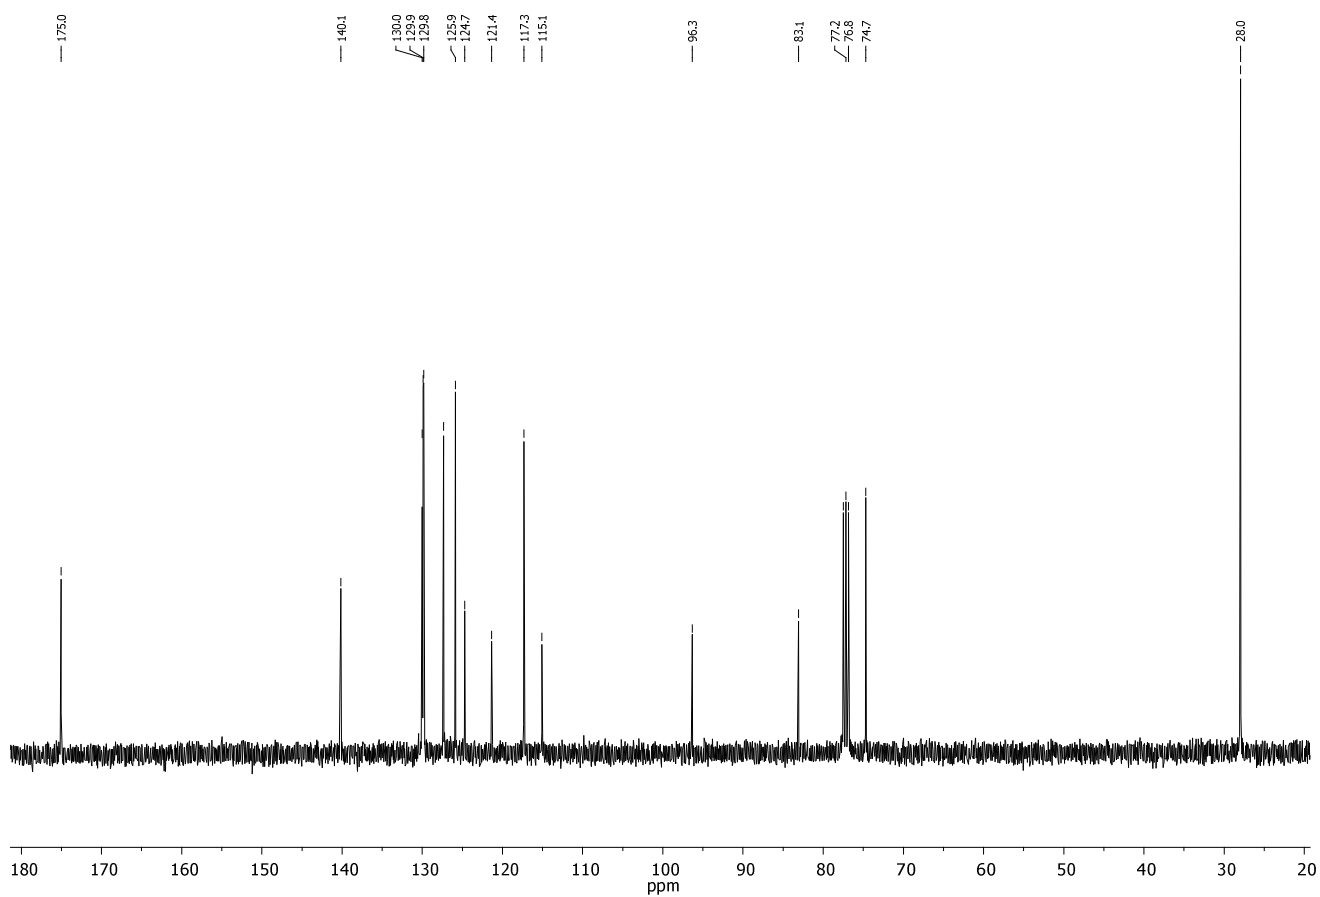

<sup>1</sup>H-NMR (300 MHz, CDCl<sub>3</sub>):

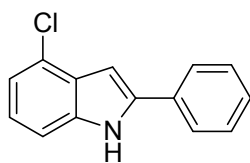

**11a**

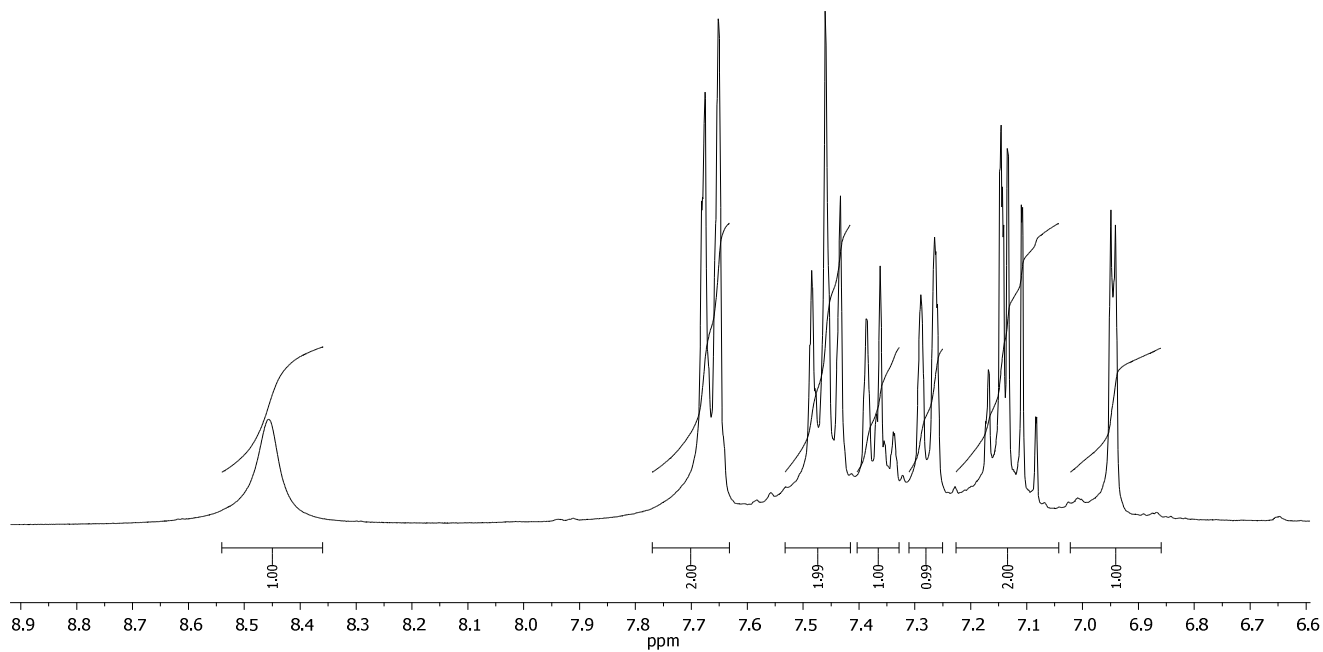

<sup>13</sup>C-NMR (75.4 MHz, CDCl<sub>3</sub>):

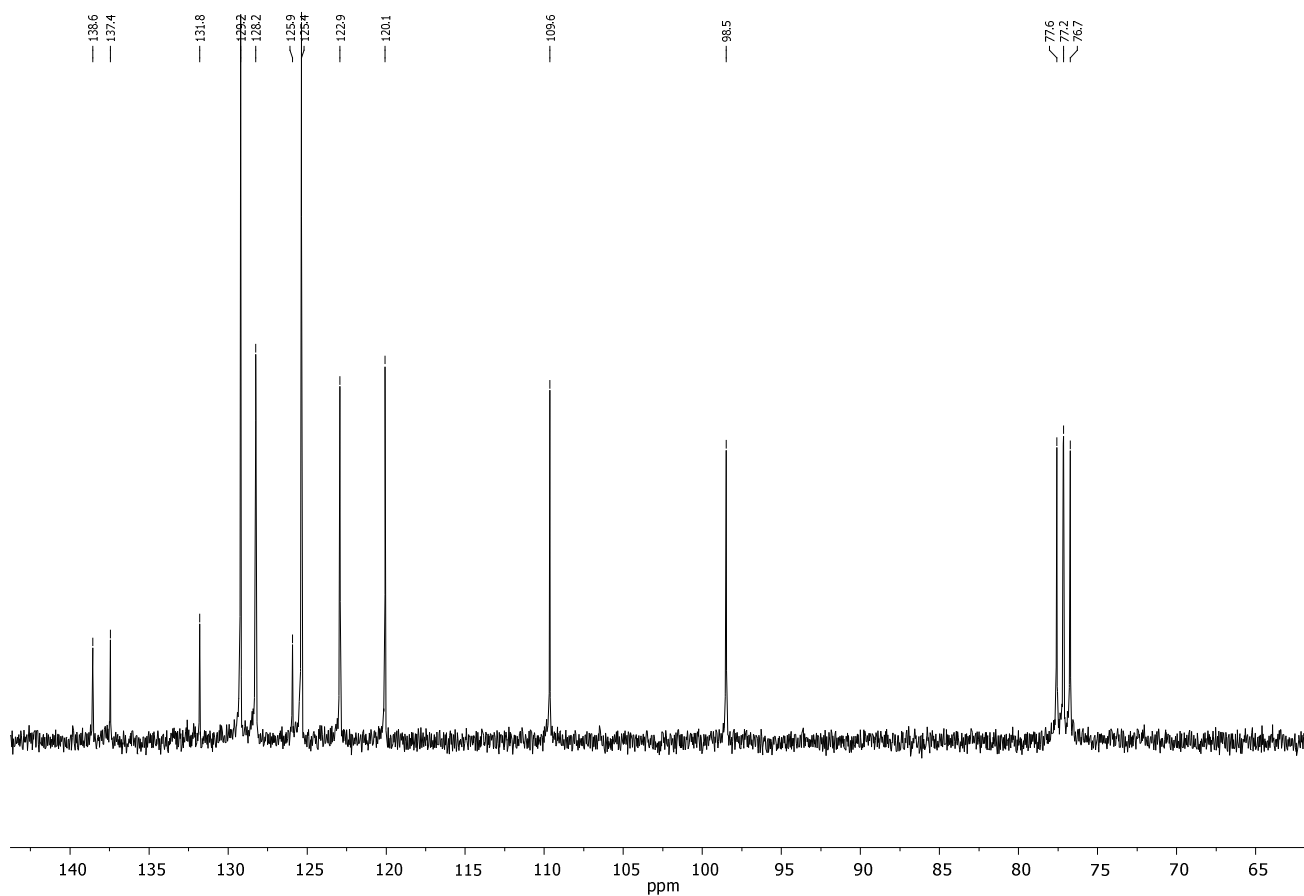

<sup>1</sup>H-NMR (300 MHz, CDCl<sub>3</sub>):

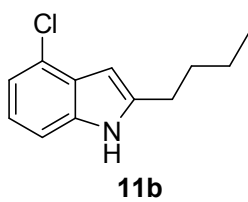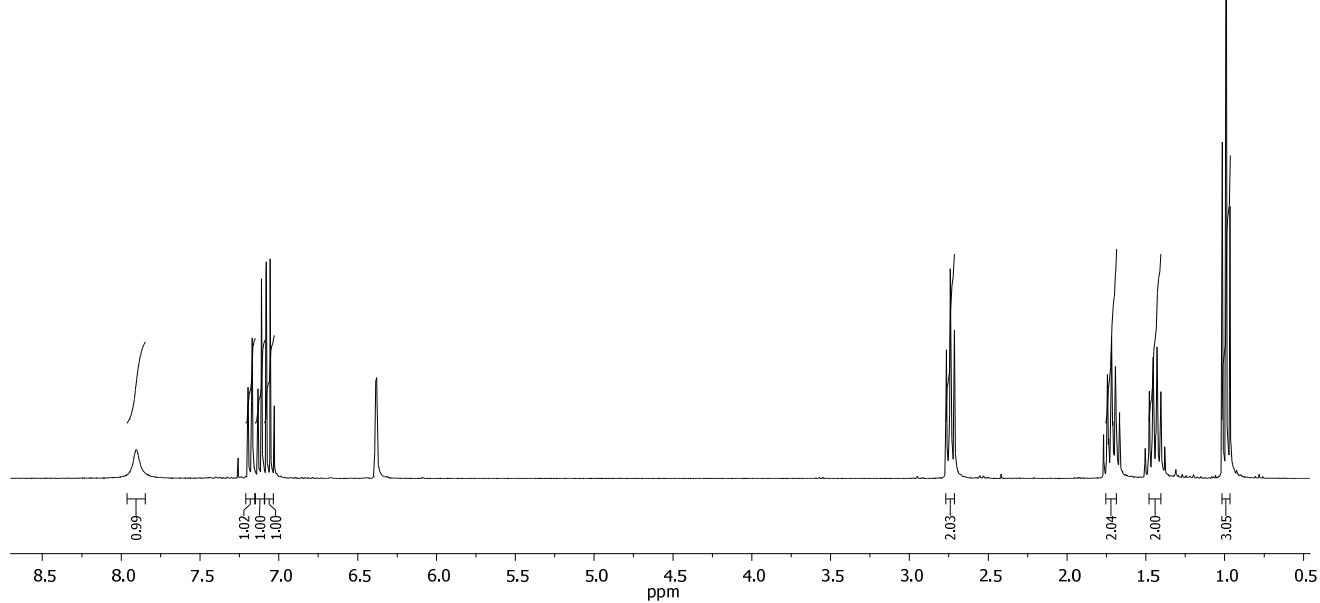

<sup>13</sup>C-NMR (75.4 MHz, CDCl<sub>3</sub>):

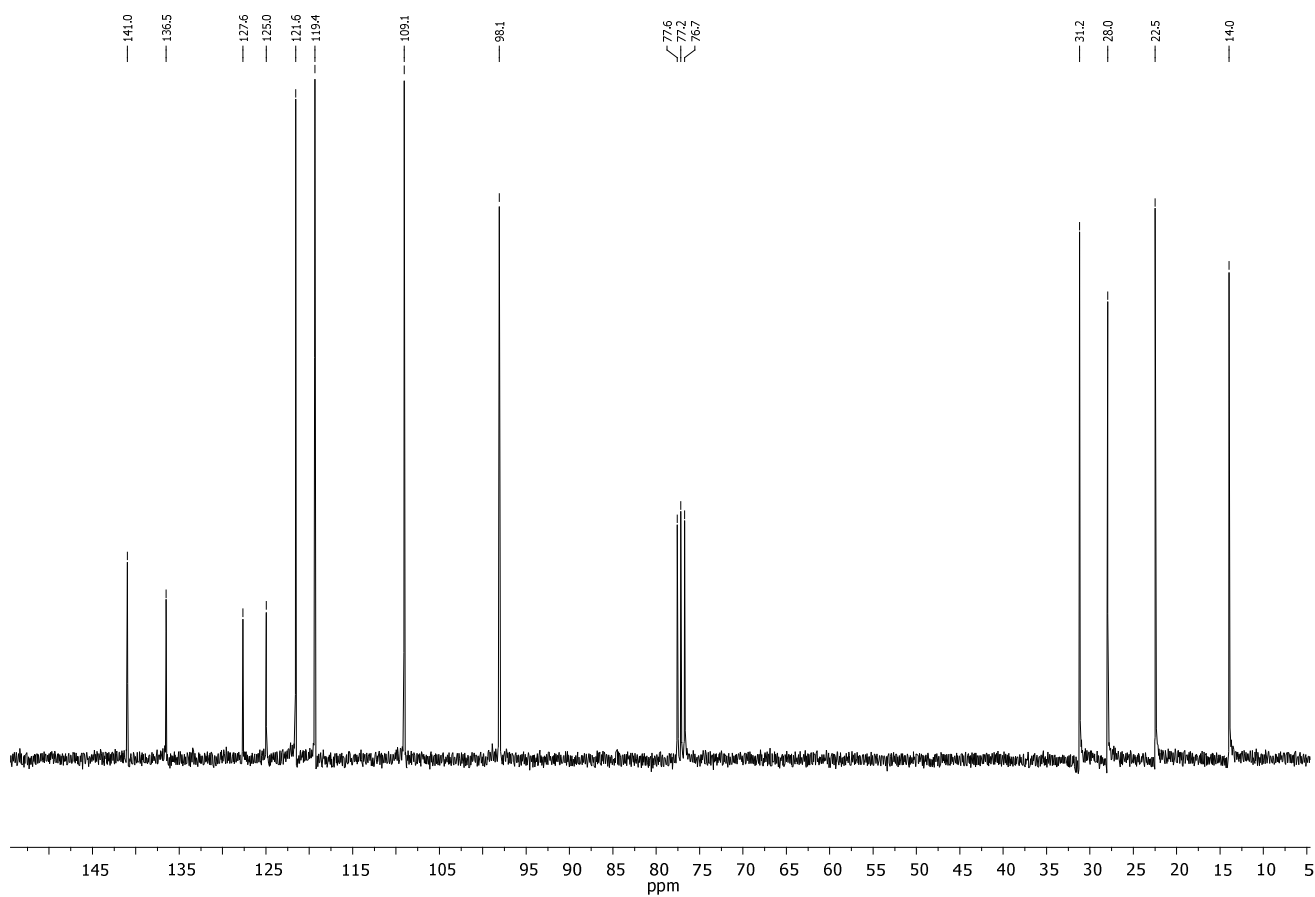



<sup>1</sup>H-NMR (300 MHz, CDCl<sub>3</sub>):

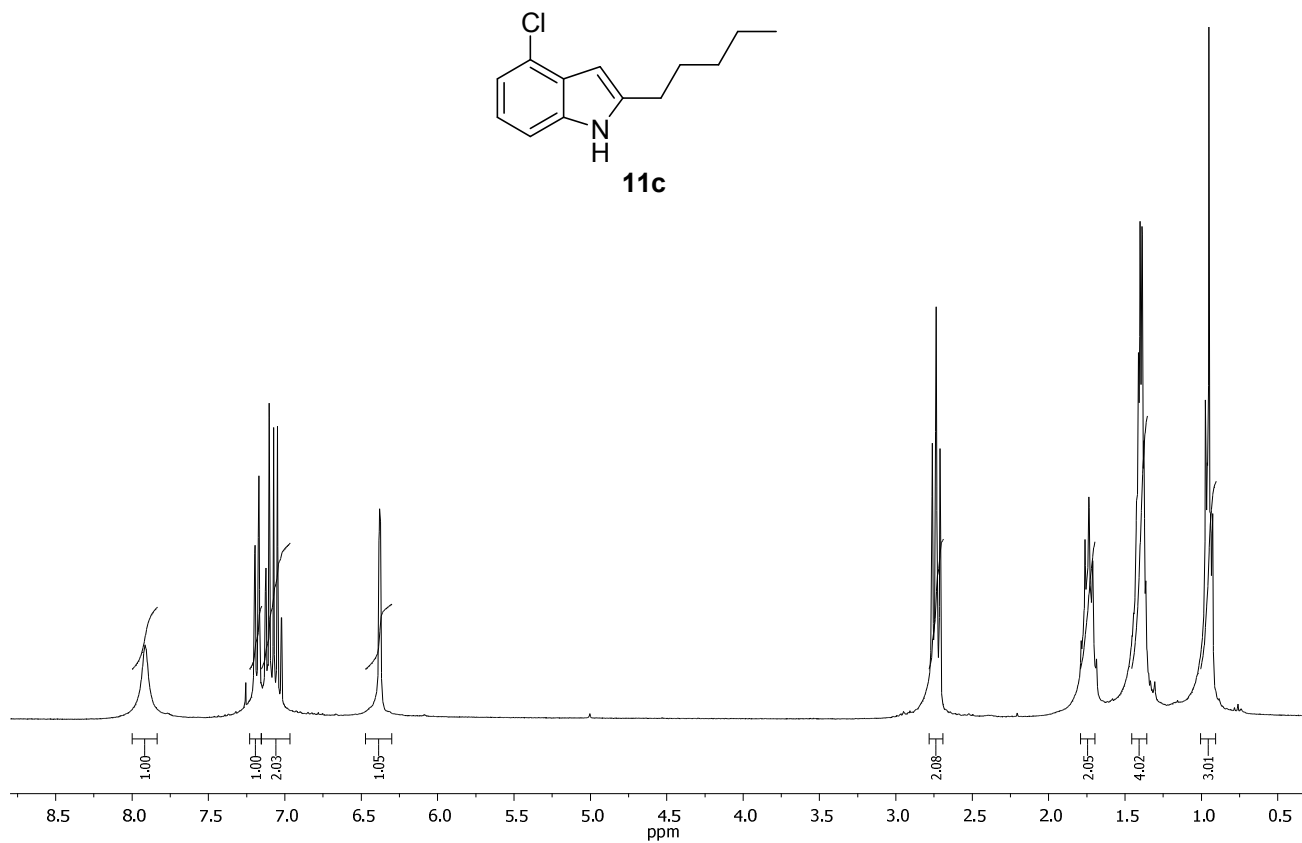

<sup>13</sup>C-NMR (75.4 MHz, CDCl<sub>3</sub>):

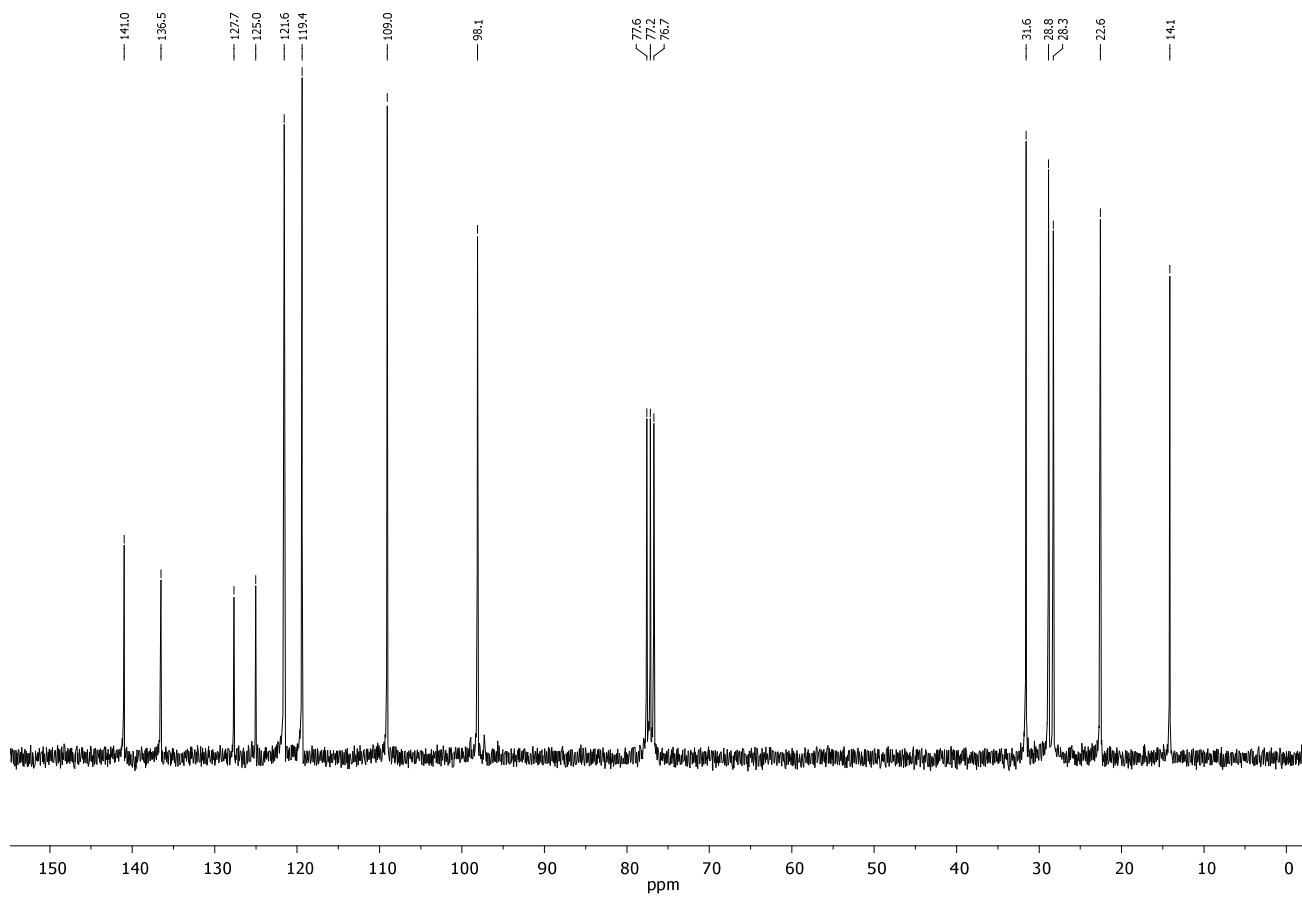

<sup>1</sup>H-NMR (300 MHz, CDCl<sub>3</sub>):

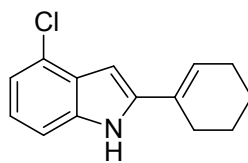

**11d**

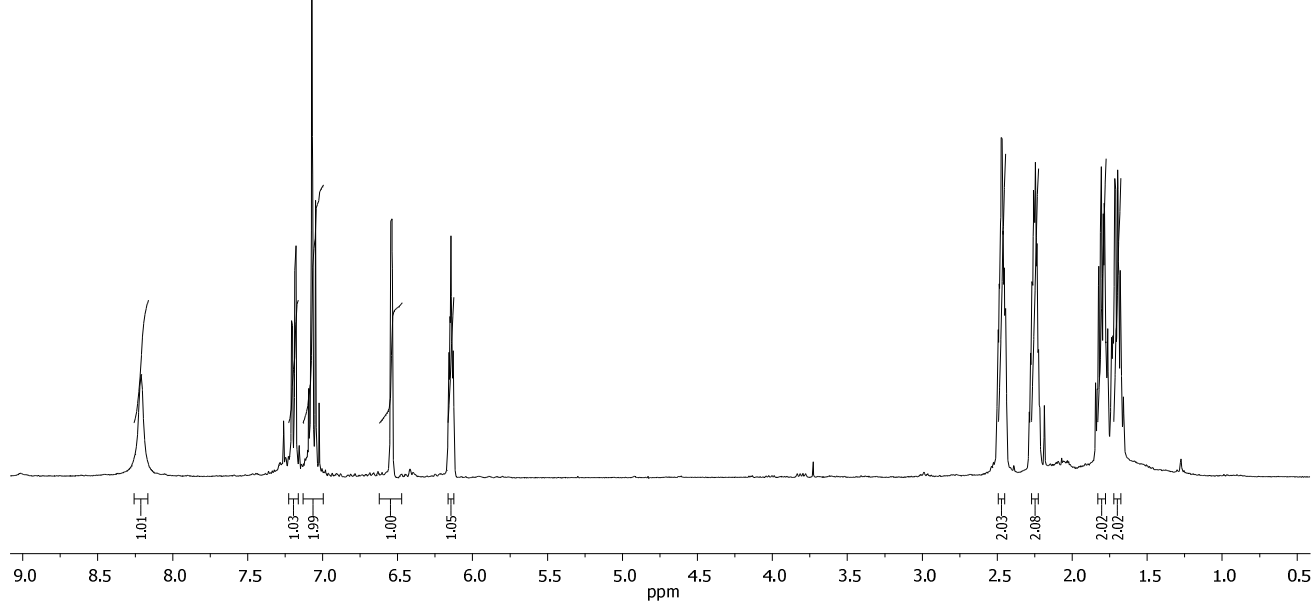

<sup>13</sup>C-NMR (75.4 MHz, CDCl<sub>3</sub>):

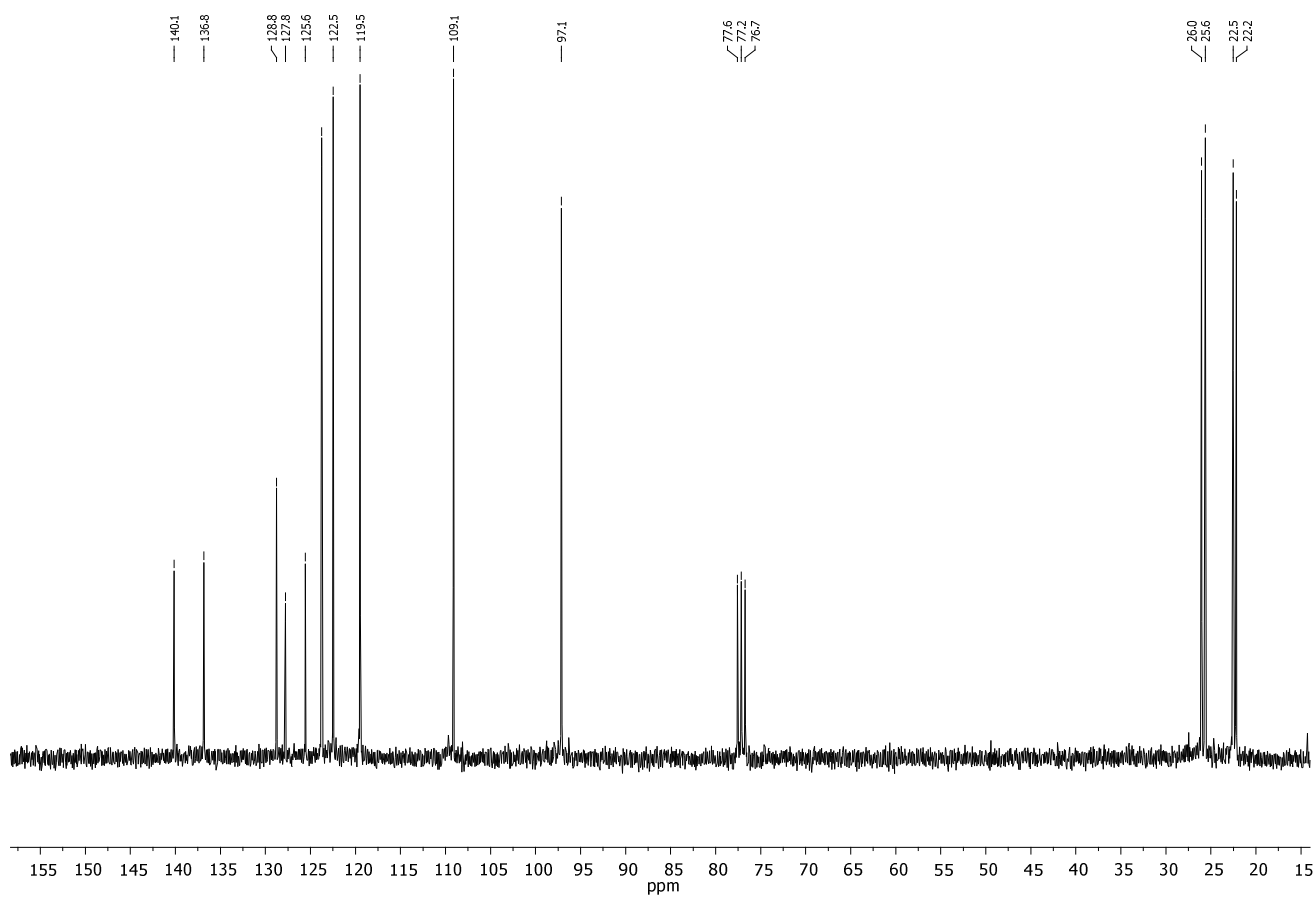

**<sup>1</sup>H-NMR (300 MHz, CDCl<sub>3</sub>):**

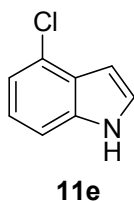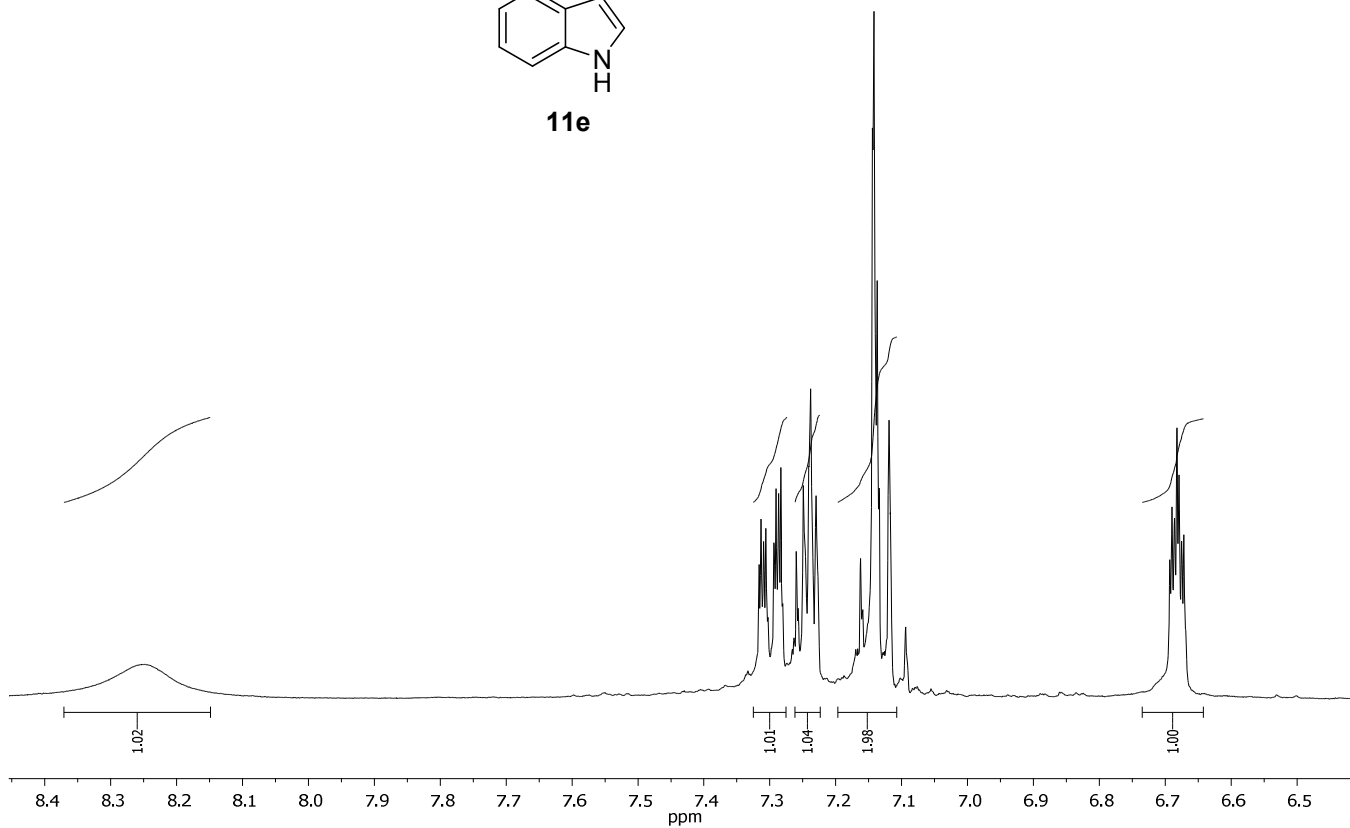

**<sup>13</sup>C-NMR (75.4 MHz, CDCl<sub>3</sub>):**

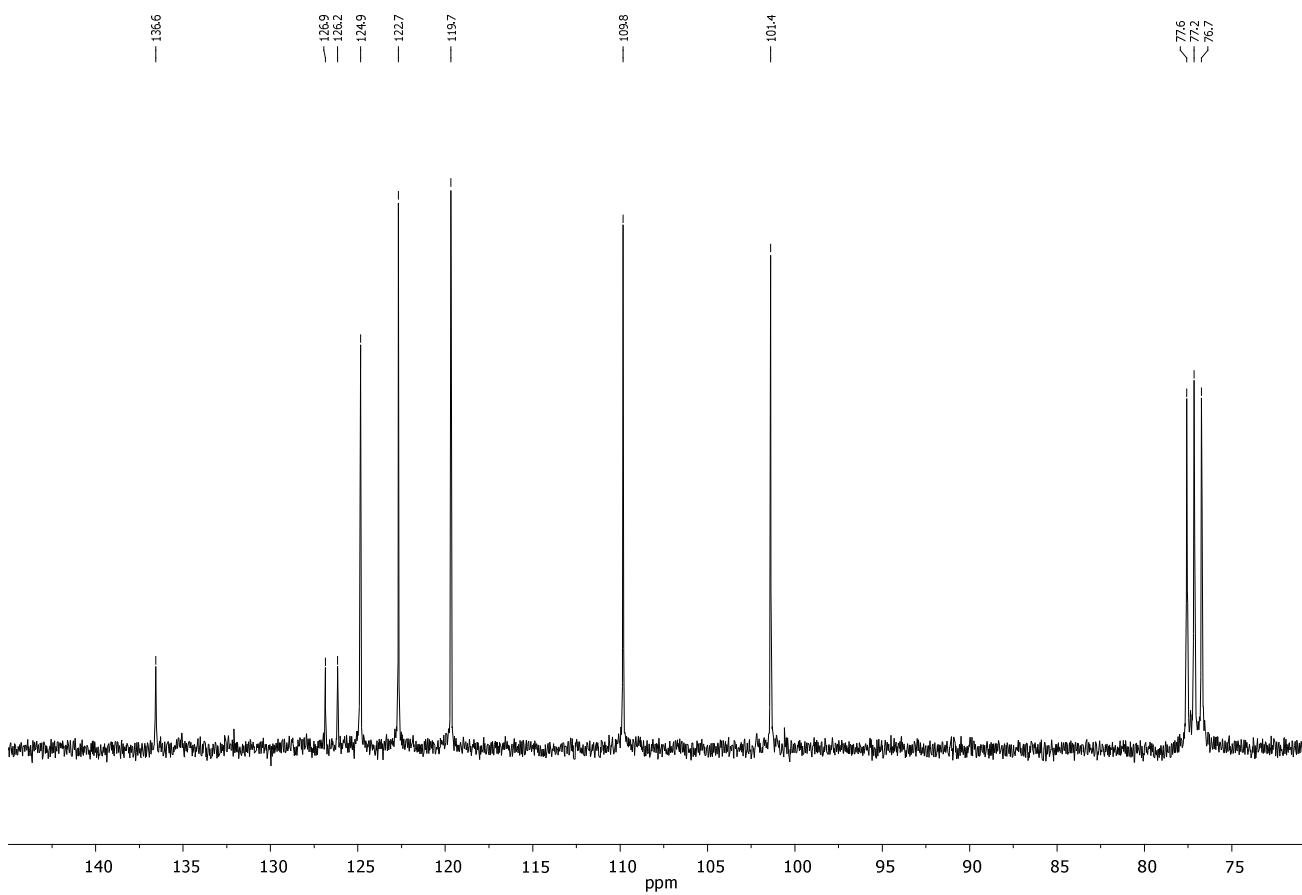

<sup>1</sup>H-NMR (300 MHz, CDCl<sub>3</sub>):

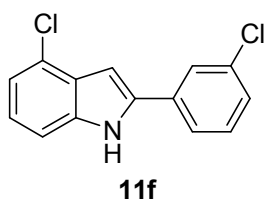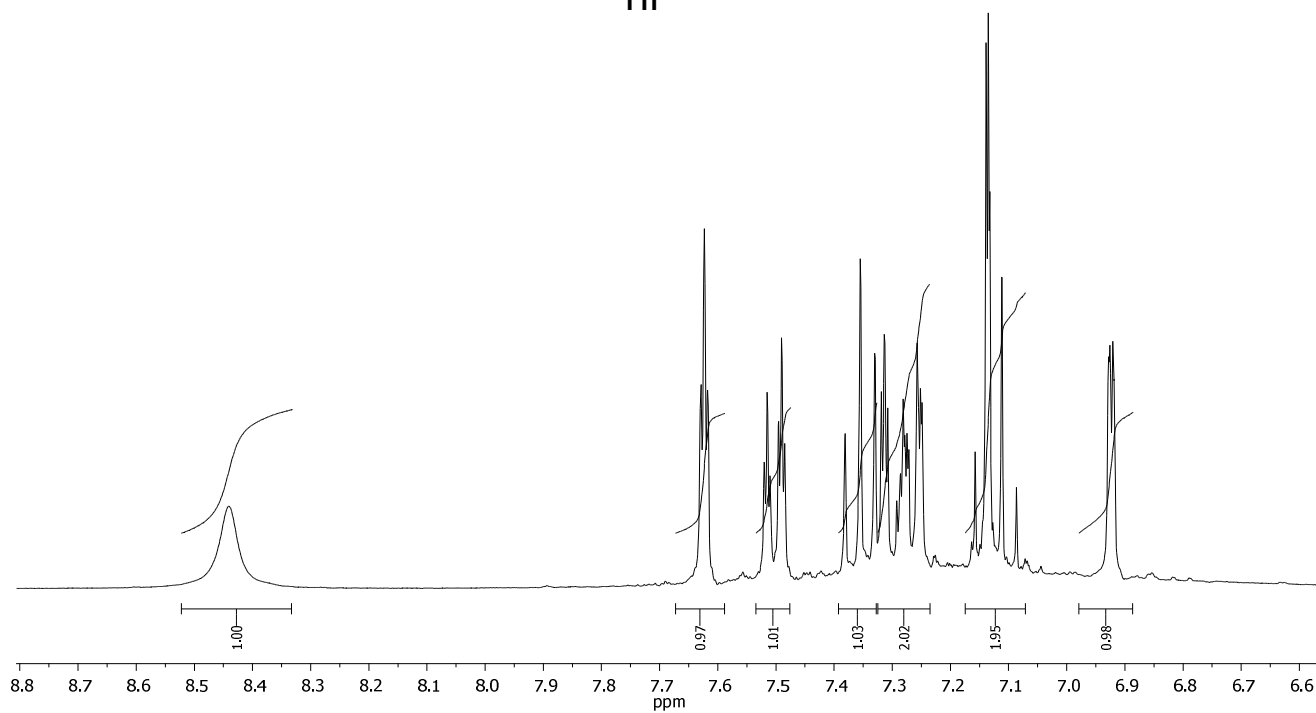

<sup>13</sup>C-NMR (75.4 MHz, CDCl<sub>3</sub>):

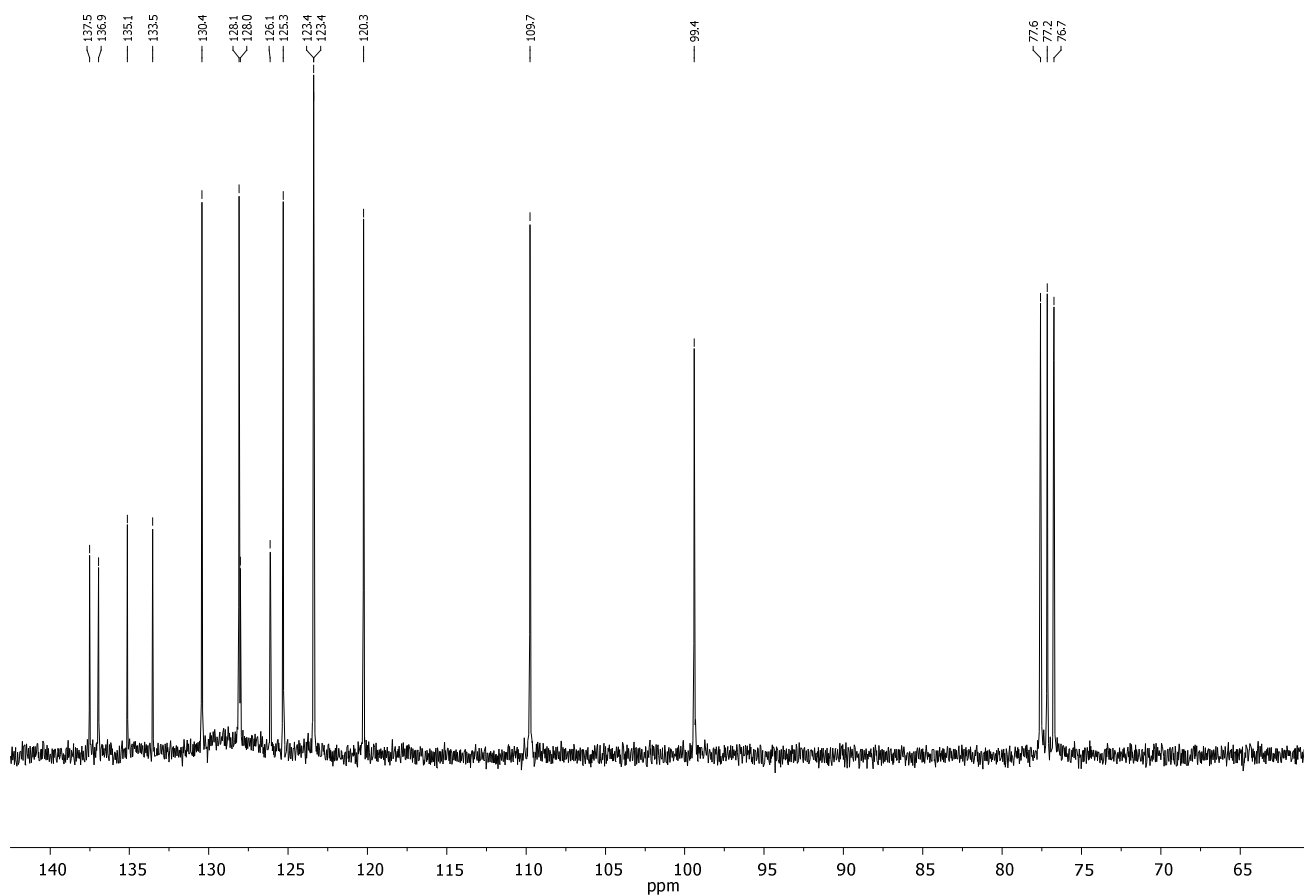

<sup>1</sup>H-NMR (300 MHz, CDCl<sub>3</sub>):

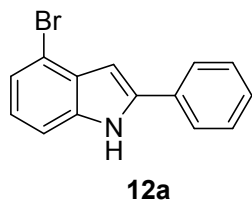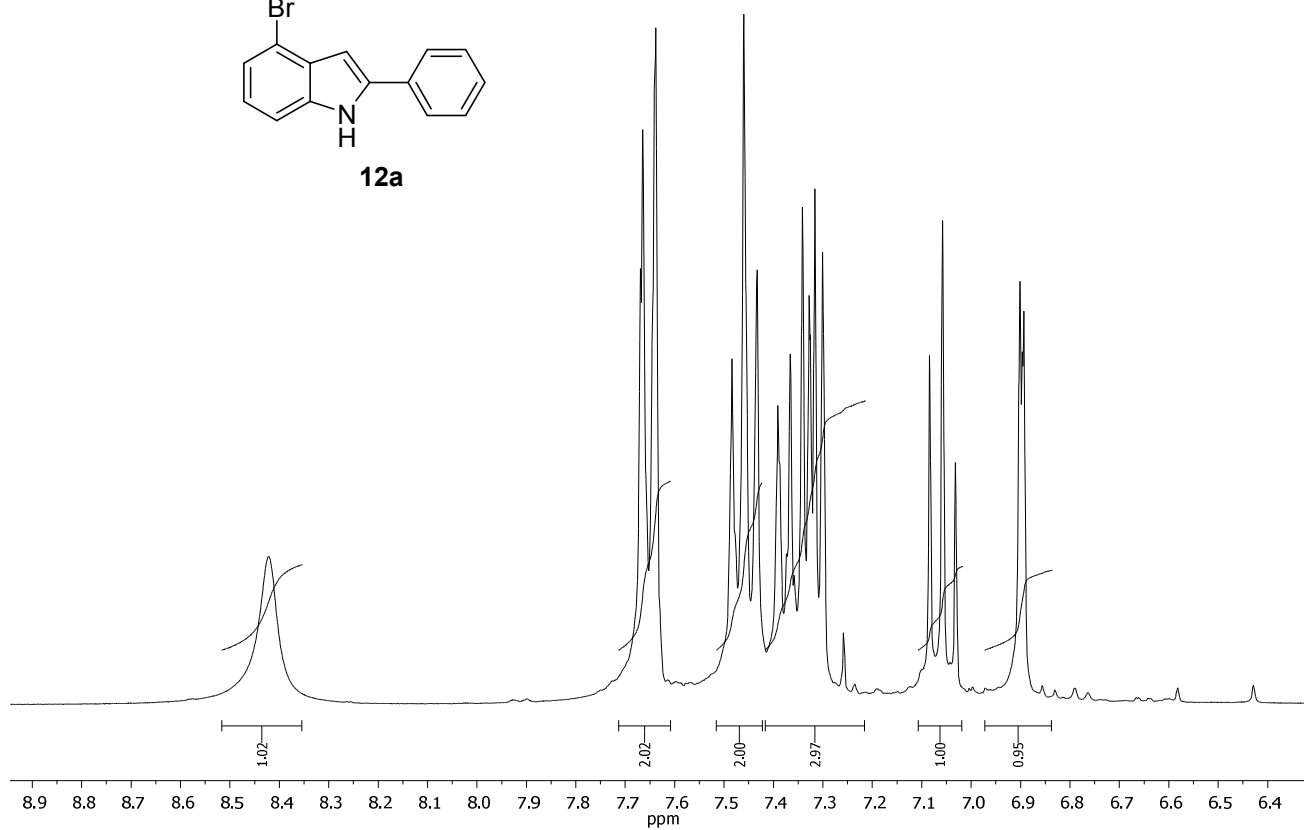

<sup>13</sup>C-NMR (75.4 MHz, CDCl<sub>3</sub>):

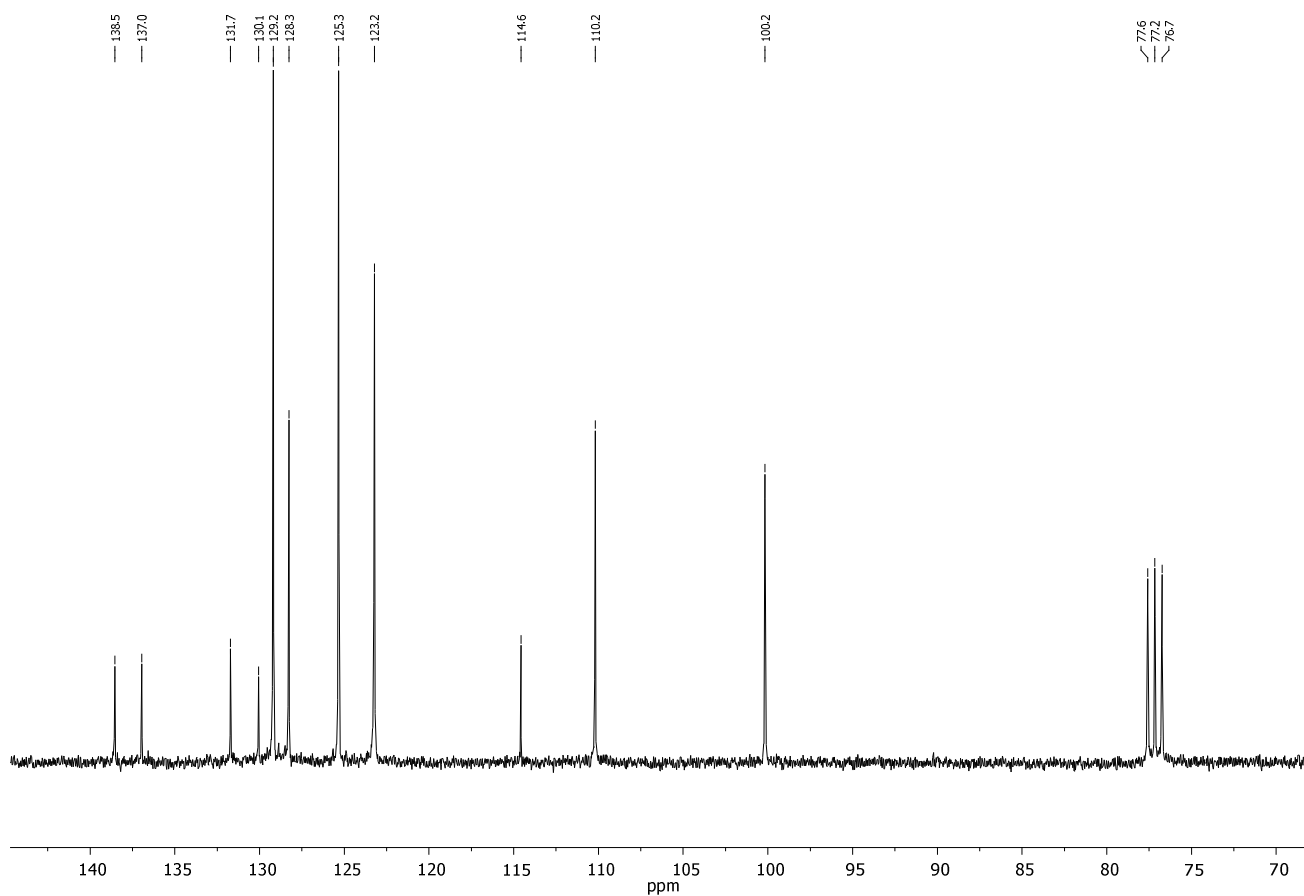

<sup>1</sup>H-NMR (300 MHz, CDCl<sub>3</sub>):

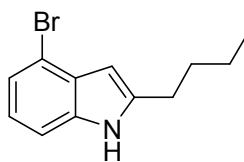

**12b**

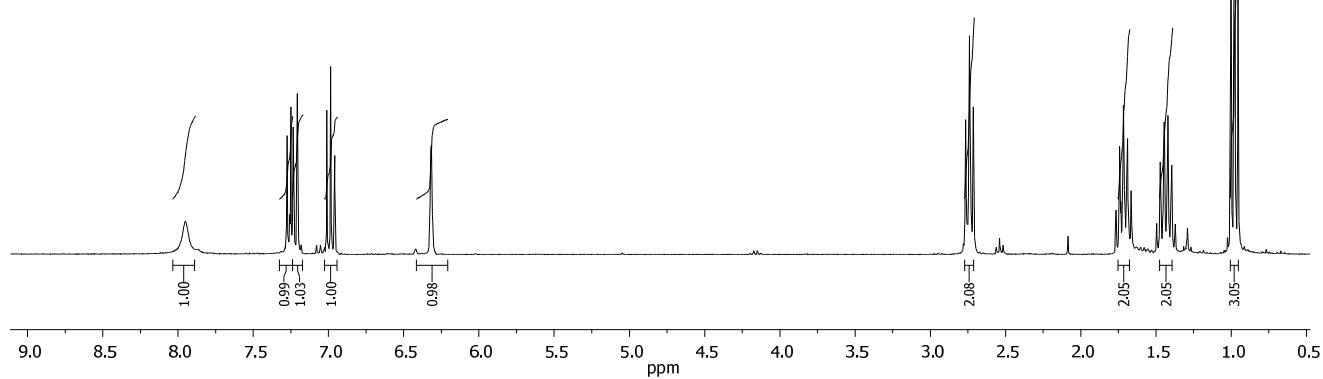

<sup>13</sup>C-NMR (75.4 MHz, CDCl<sub>3</sub>):

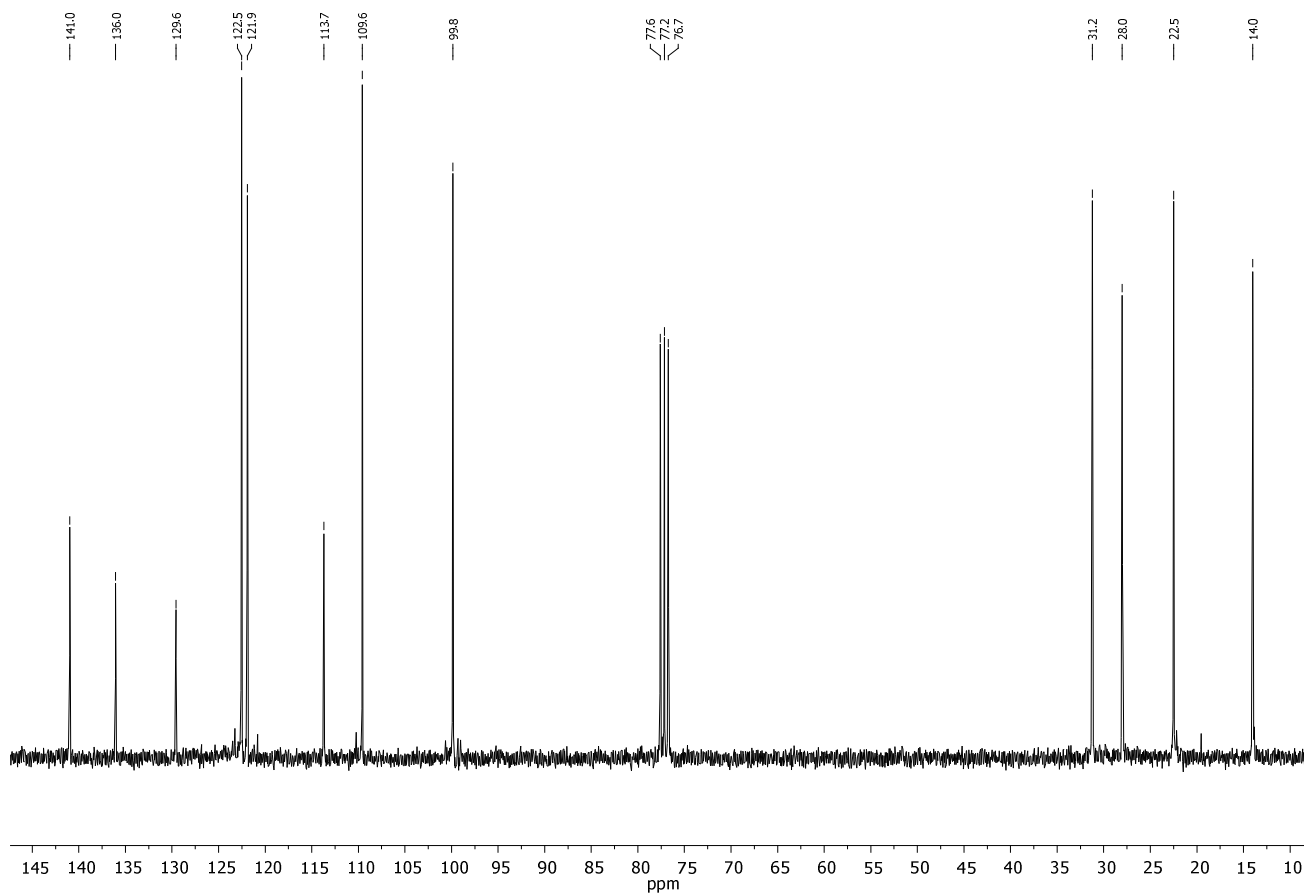

<sup>1</sup>H-NMR (300 MHz, CDCl<sub>3</sub>):

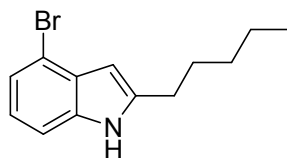

**12c**

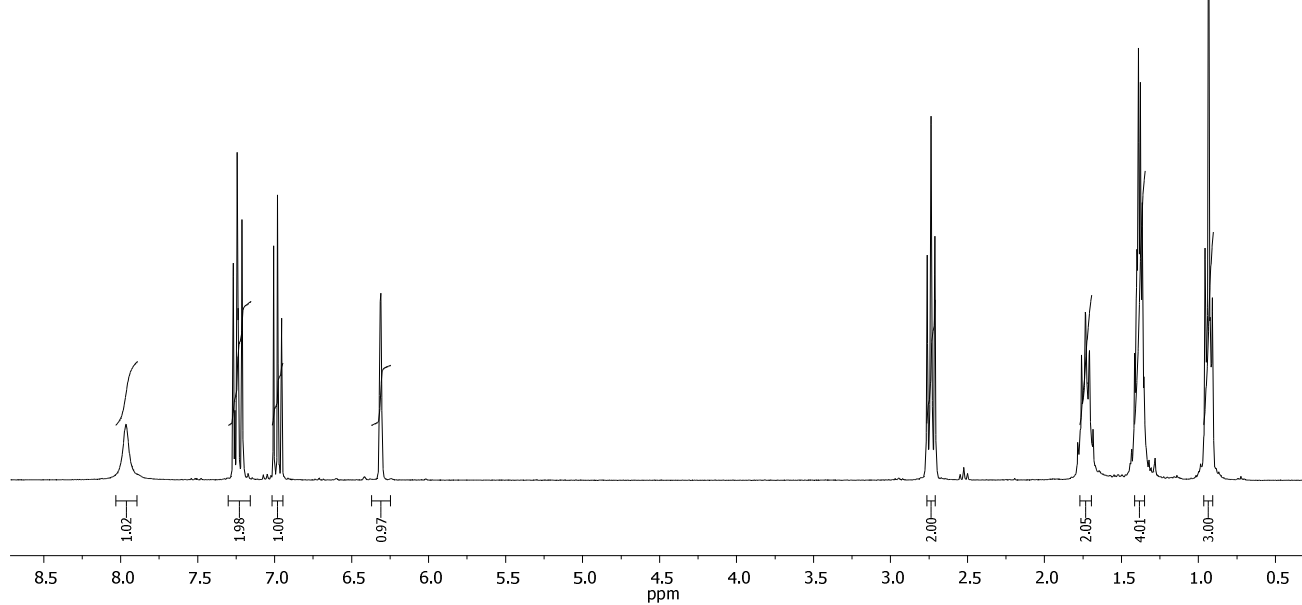

<sup>13</sup>C-NMR (75.4 MHz, CDCl<sub>3</sub>):

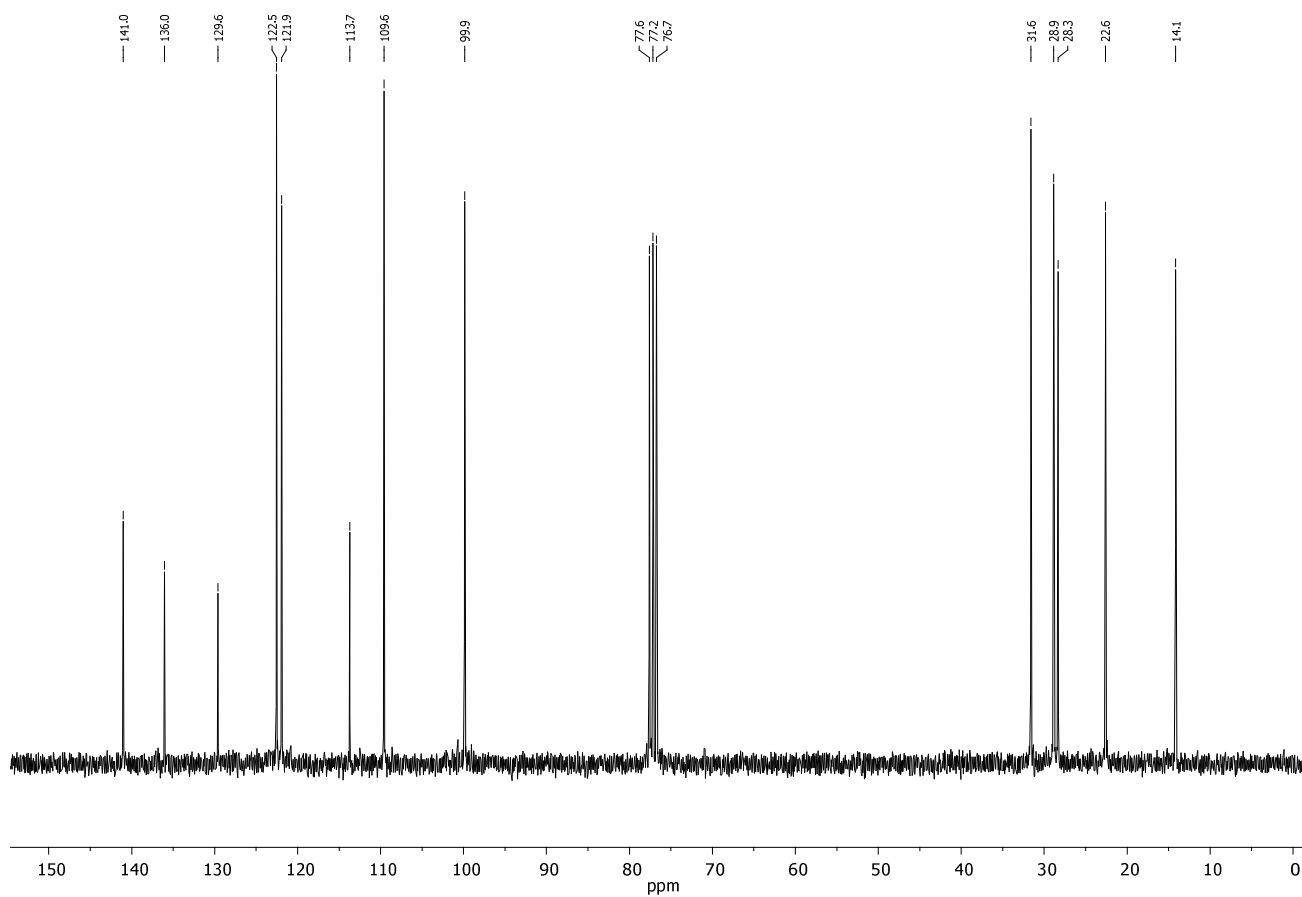

<sup>1</sup>H-NMR (300 MHz, CDCl<sub>3</sub>):

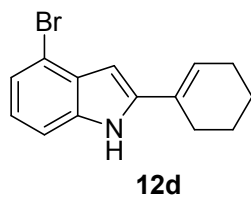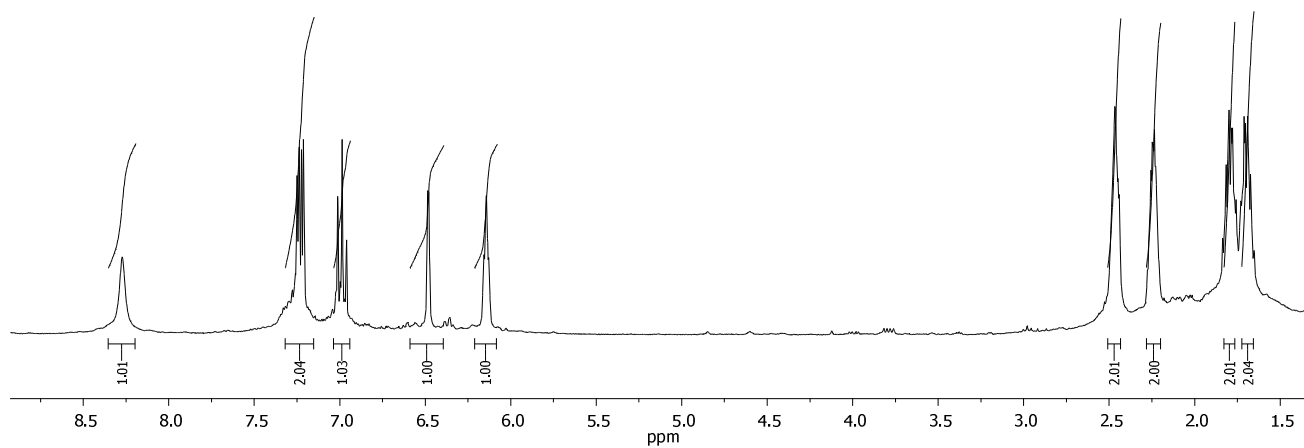

<sup>13</sup>C-NMR (75.4 MHz, CDCl<sub>3</sub>):

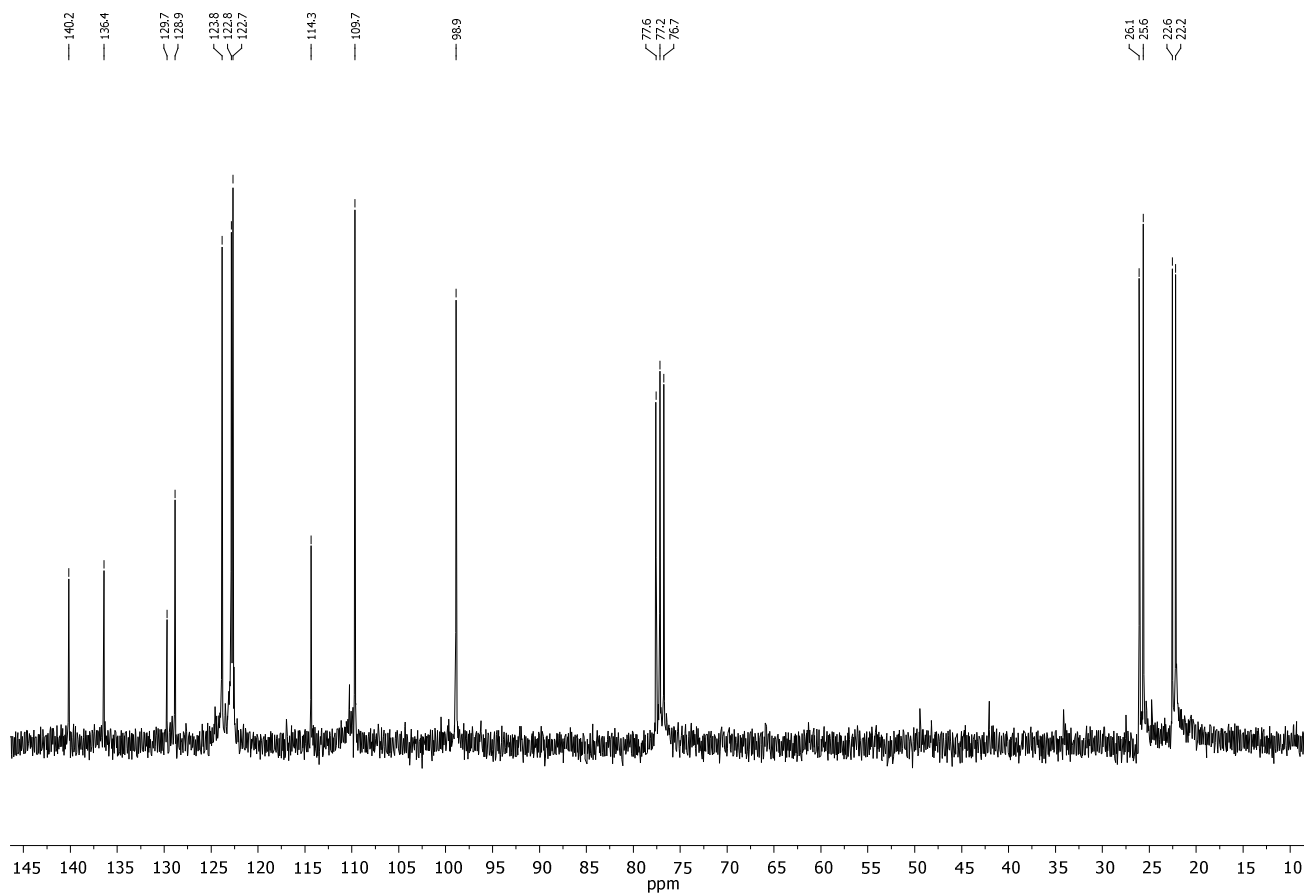



<sup>1</sup>H-NMR (300 MHz, CDCl<sub>3</sub>):

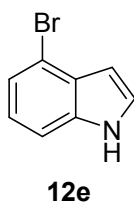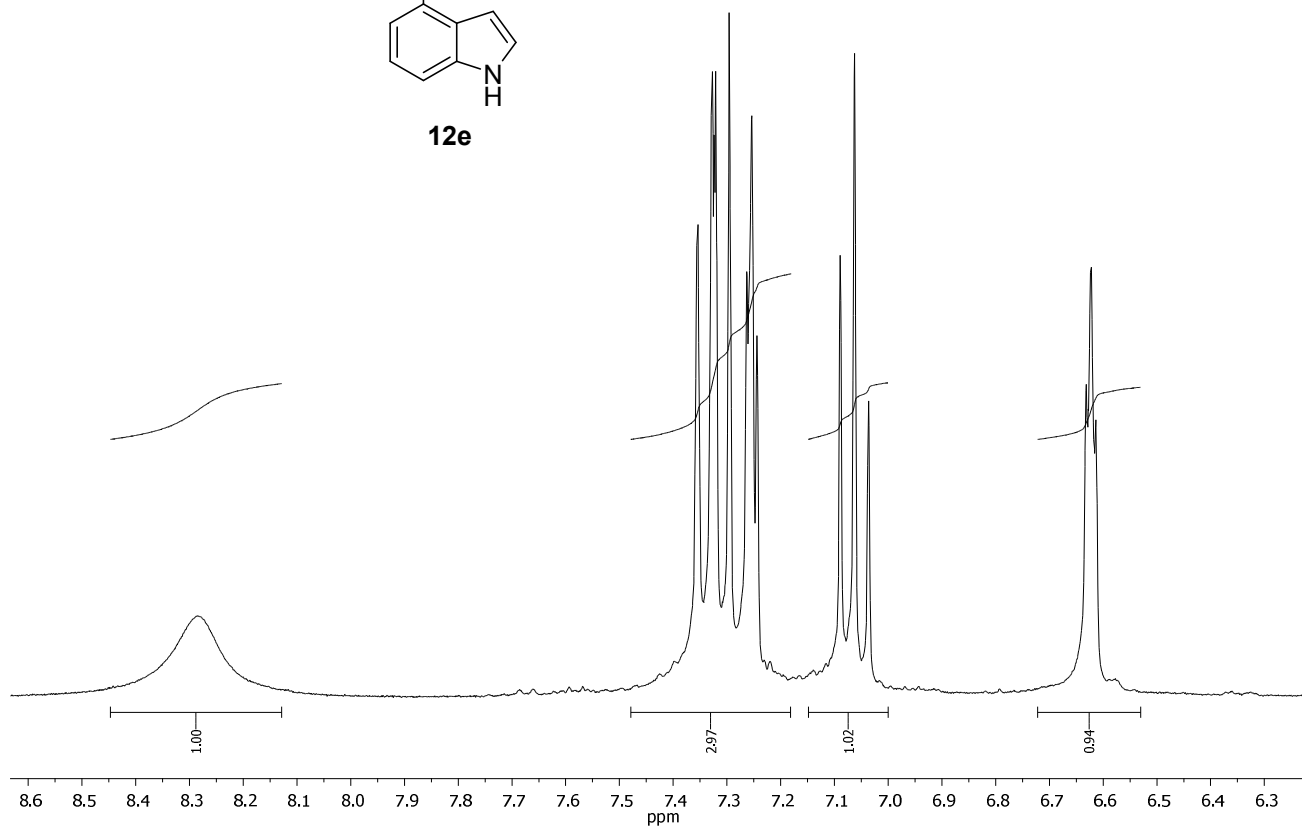

<sup>13</sup>C-NMR (75.4 MHz, CDCl<sub>3</sub>):

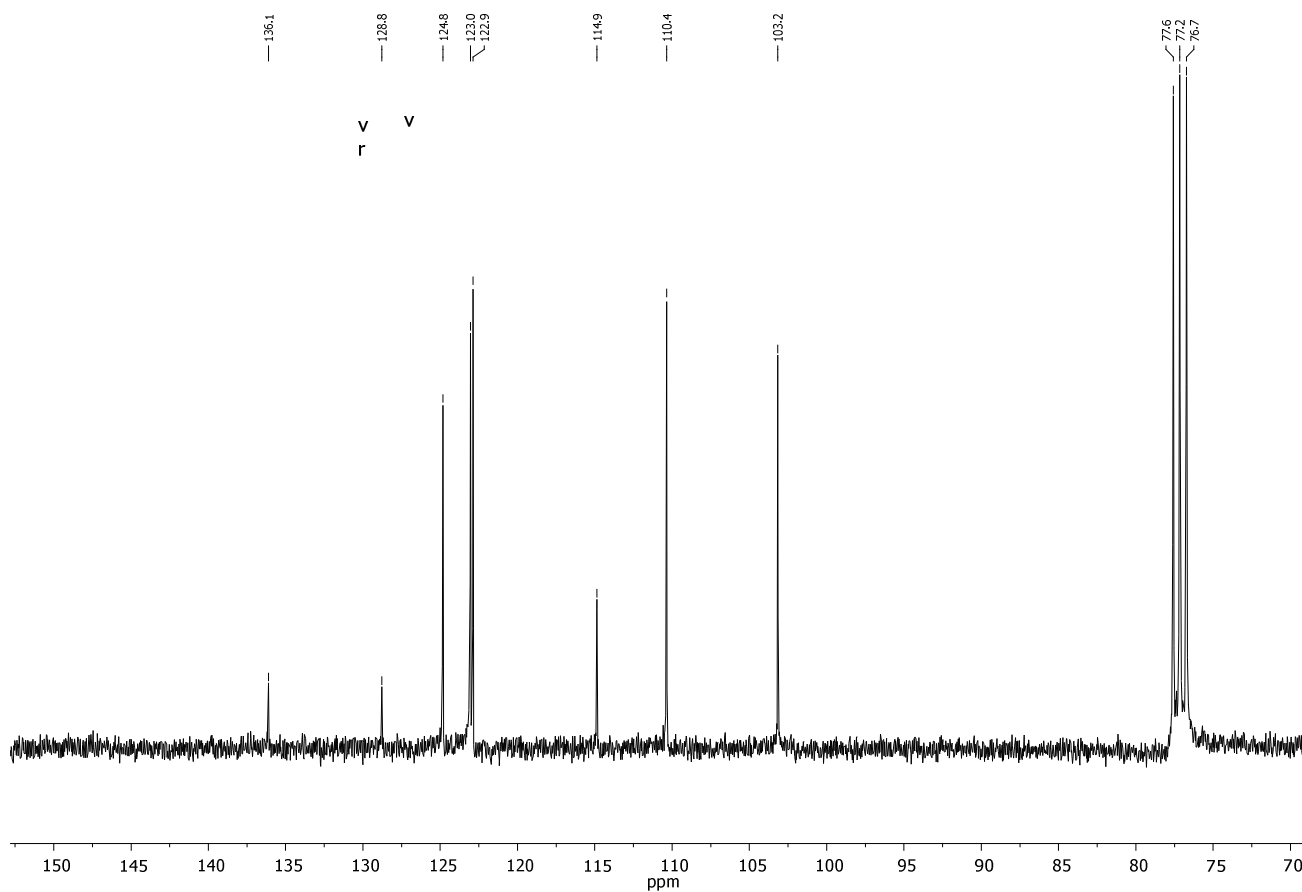

<sup>1</sup>H-NMR (300 MHz, CDCl<sub>3</sub>):

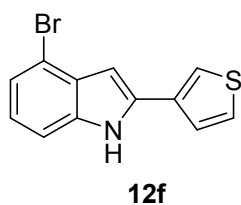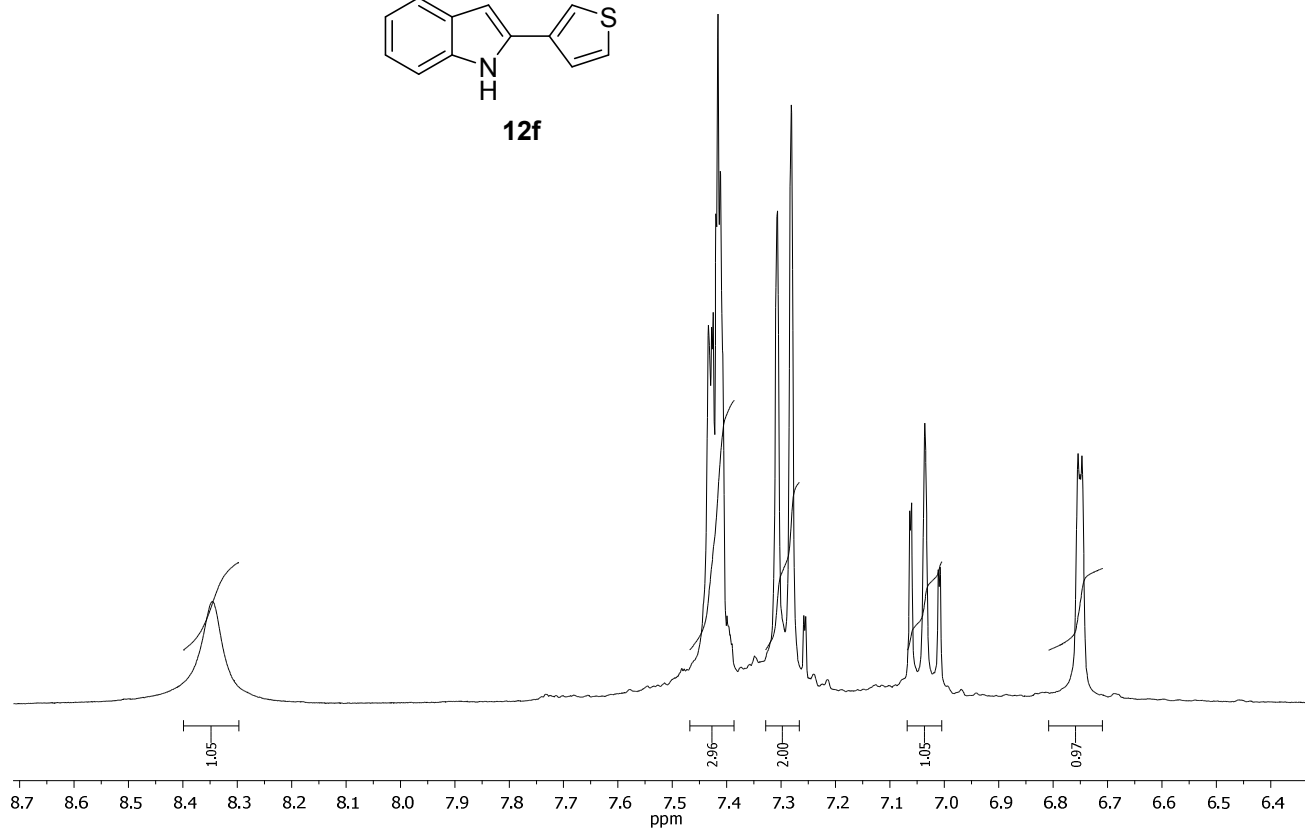

<sup>13</sup>C-NMR (75.4 MHz, CDCl<sub>3</sub>):

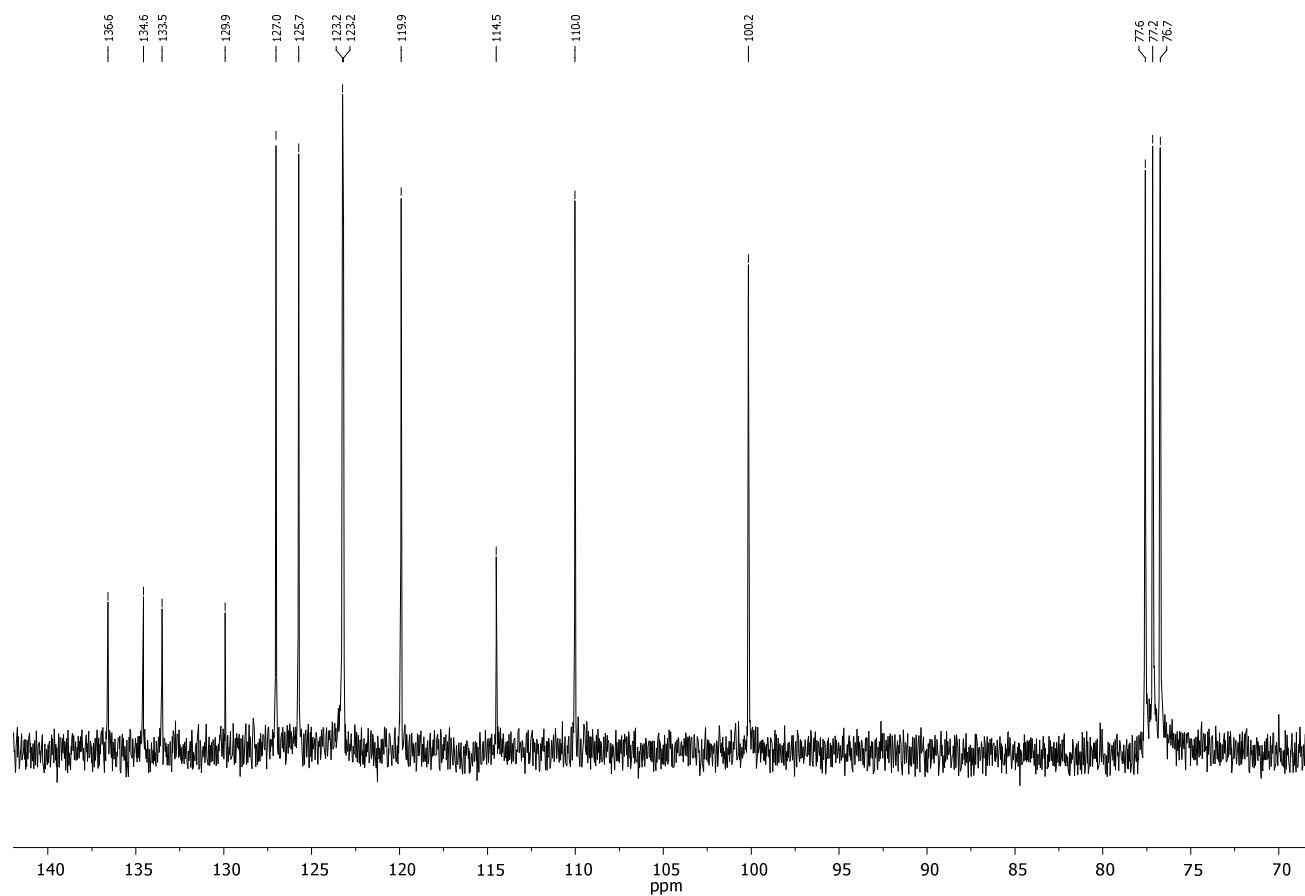

<sup>1</sup>H-NMR (300 MHz, CDCl<sub>3</sub>):

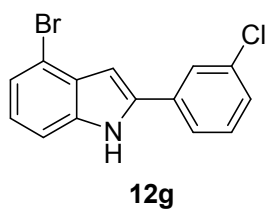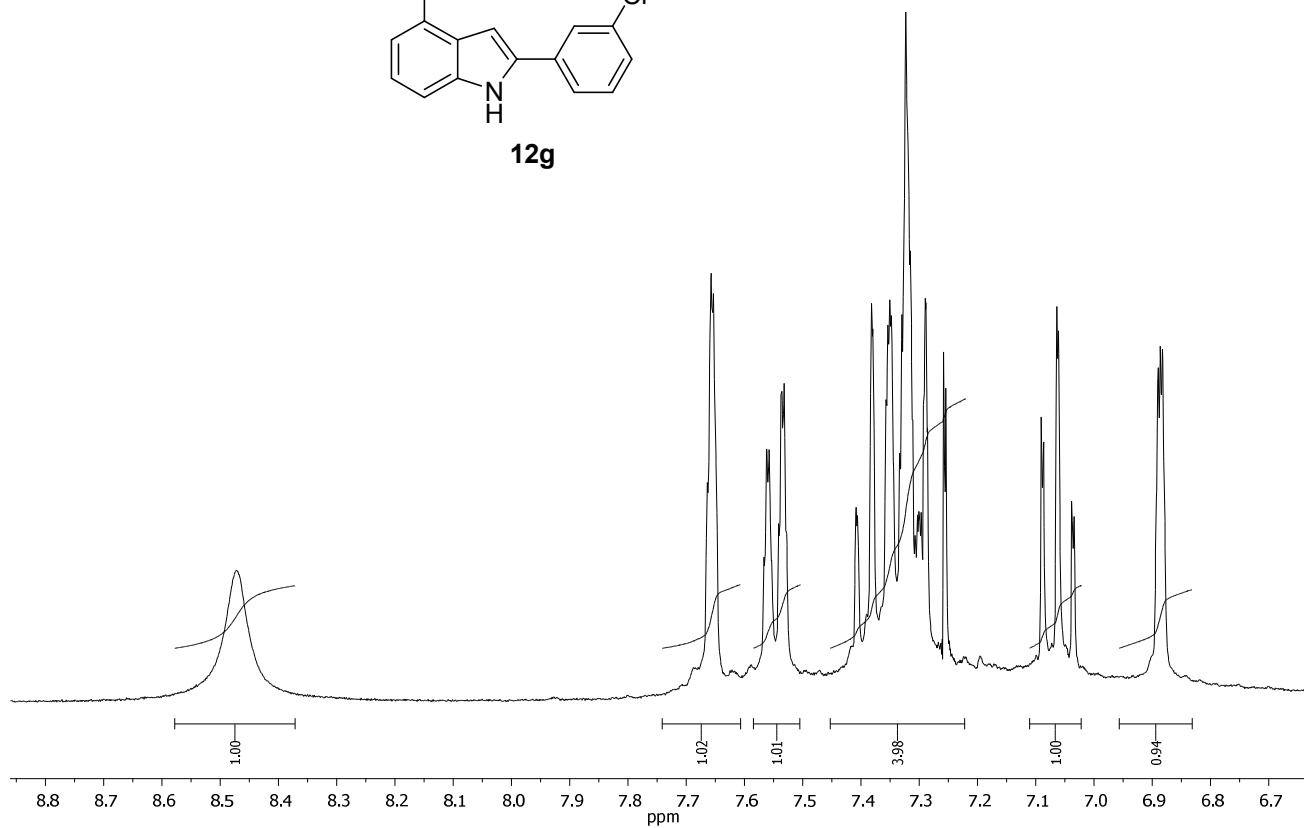

<sup>13</sup>C-NMR (75.4 MHz, CDCl<sub>3</sub>):

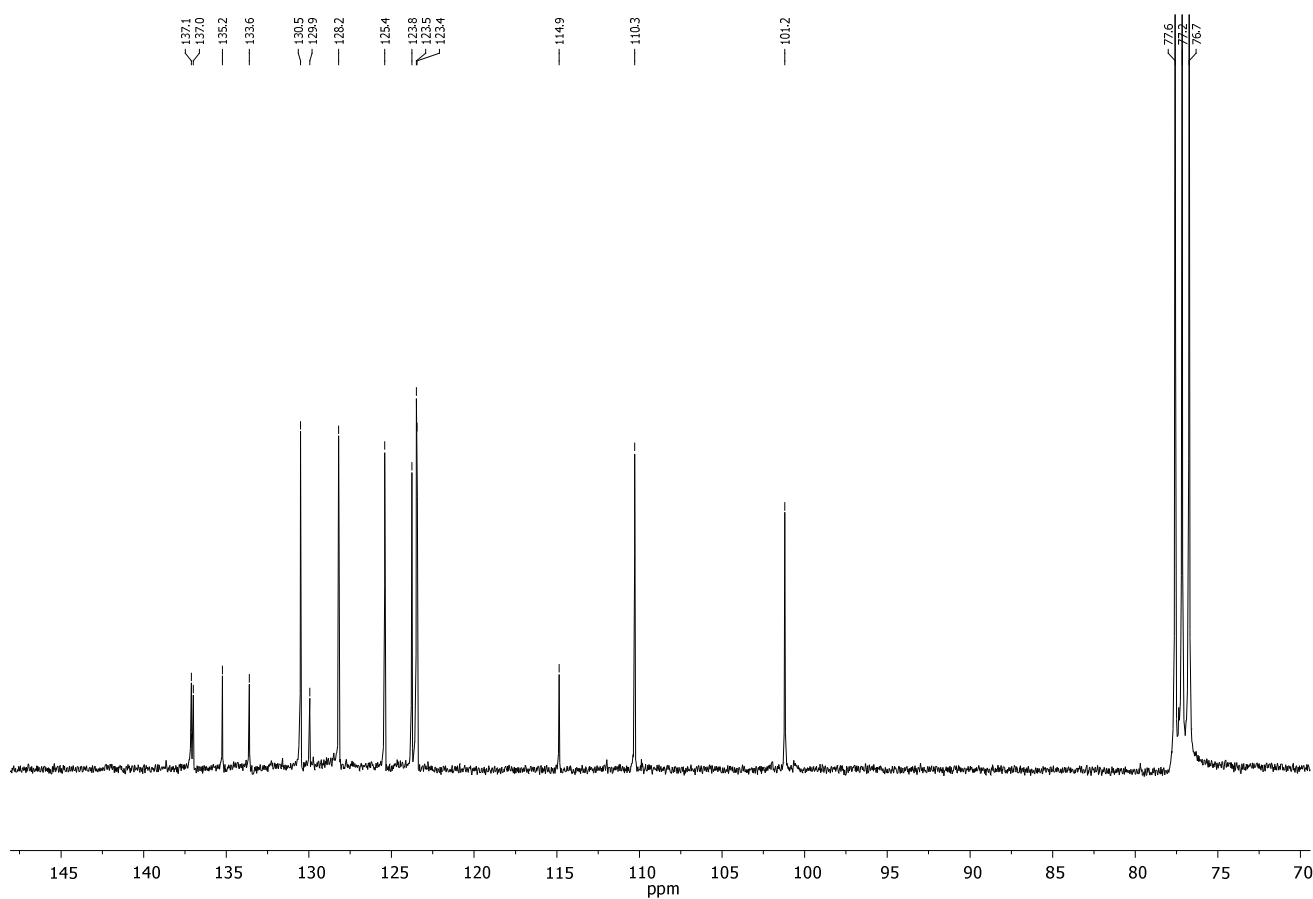

<sup>1</sup>H-NMR (300 MHz, CDCl<sub>3</sub>):

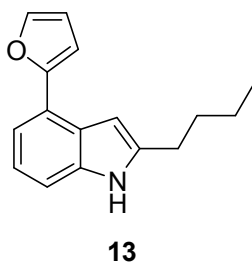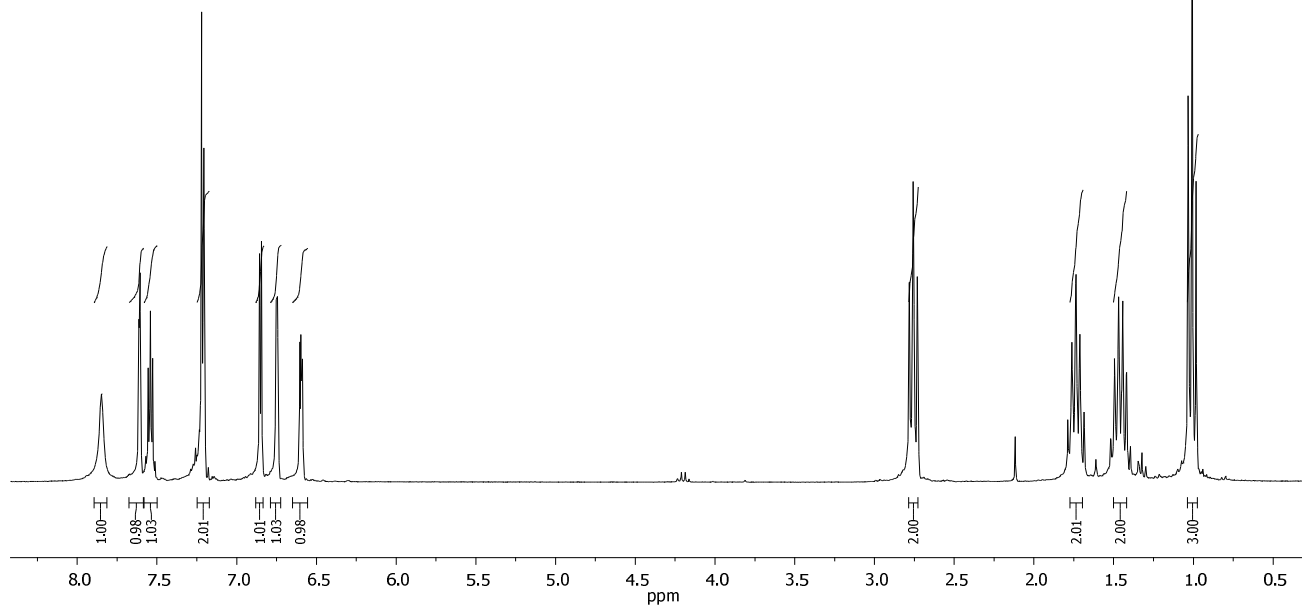

<sup>13</sup>C-NMR (75.4 MHz, CDCl<sub>3</sub>):

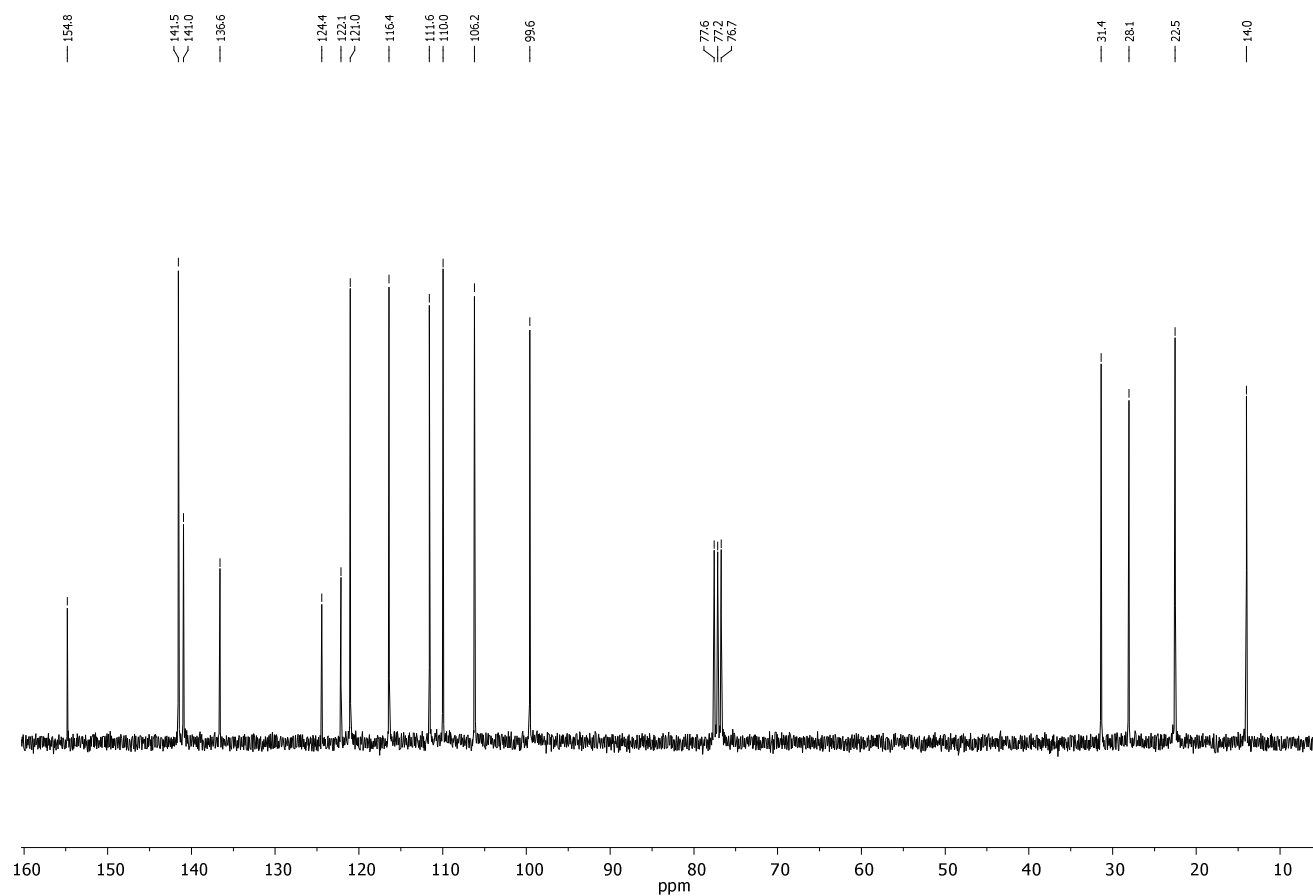

<sup>1</sup>H-NMR (300 MHz, CDCl<sub>3</sub>):

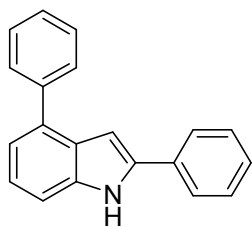

**14**

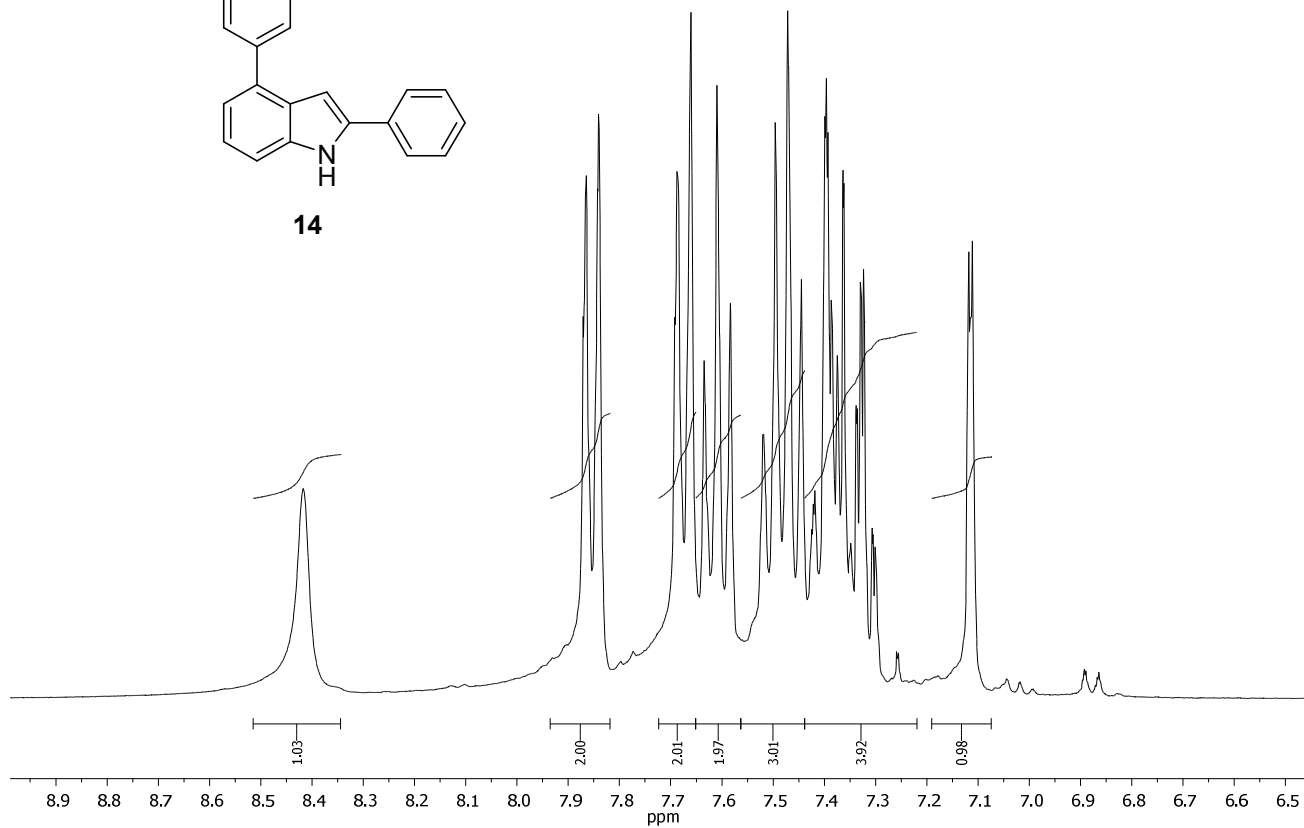

<sup>13</sup>C-NMR (75.4 MHz, CDCl<sub>3</sub>):

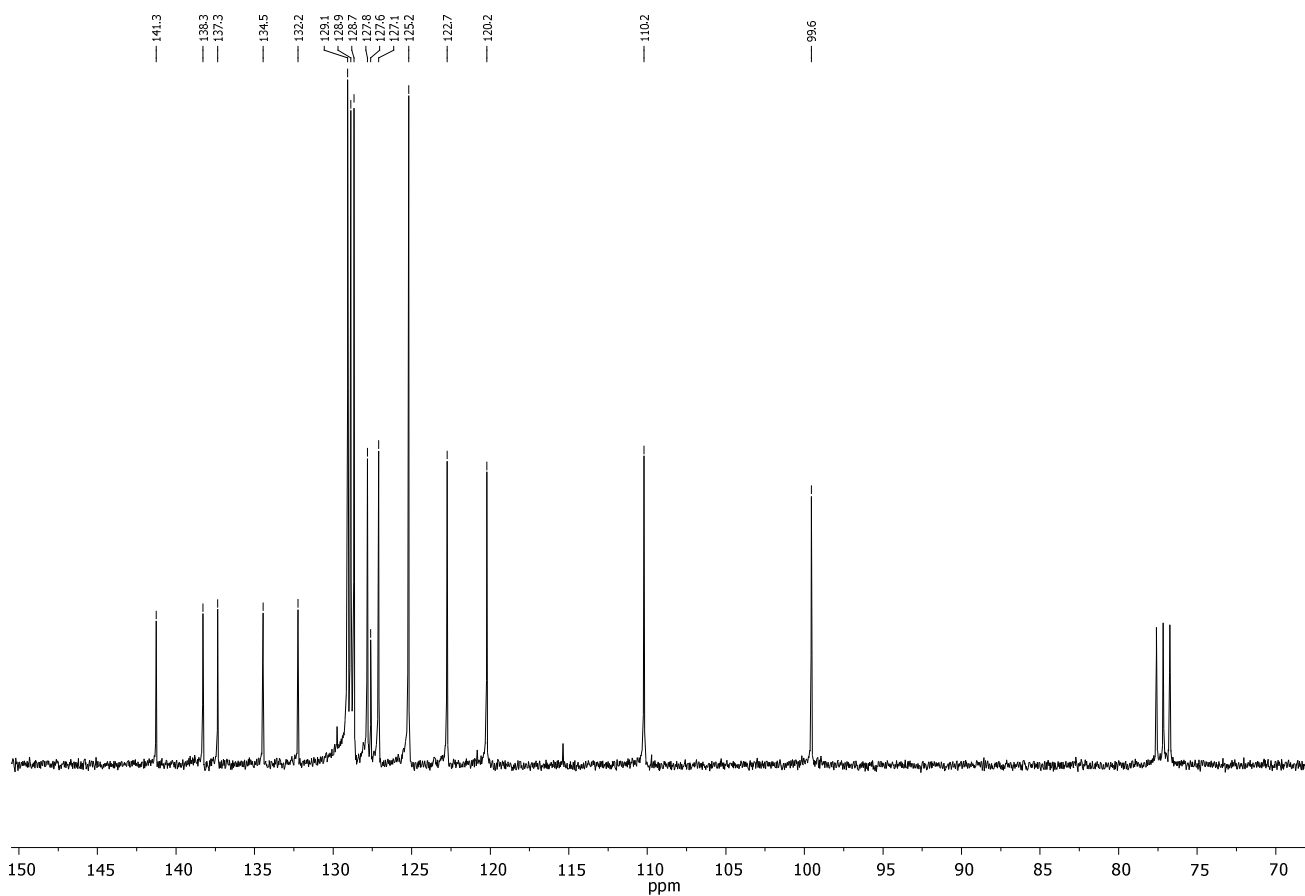

**<sup>1</sup>H-NMR (300 MHz, CDCl<sub>3</sub>):**

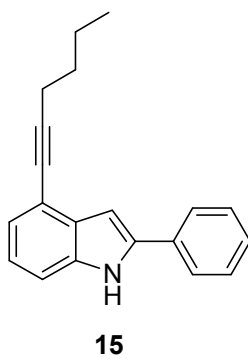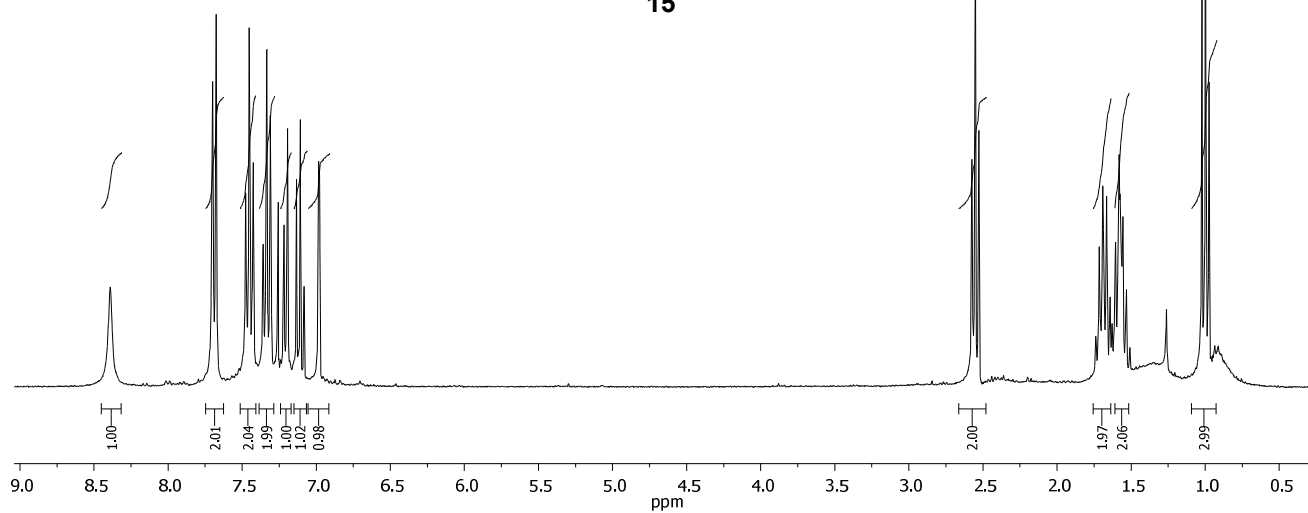

**<sup>13</sup>C-NMR (75.4 MHz, CDCl<sub>3</sub>):**

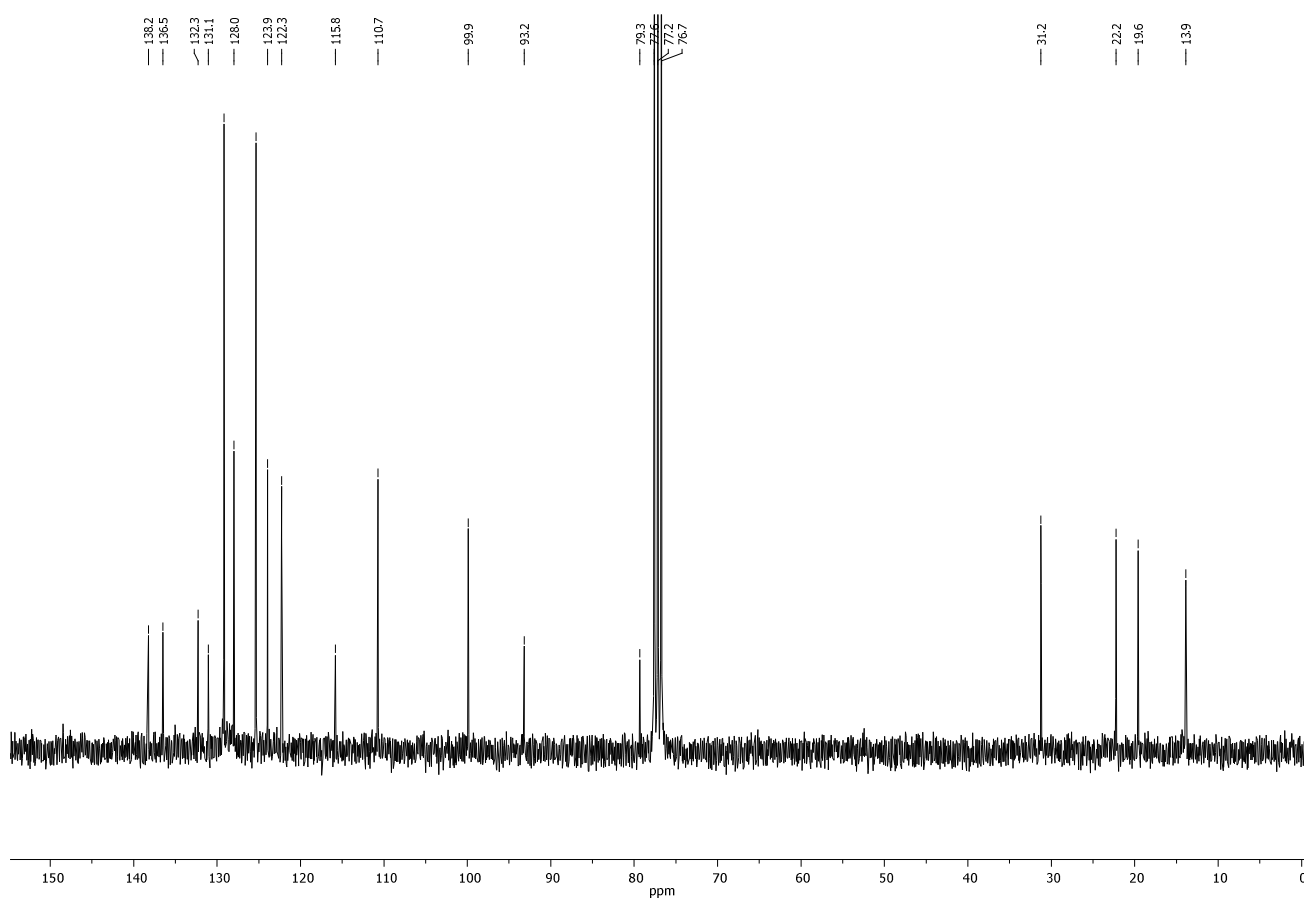

<sup>1</sup>H-NMR (300 MHz, CDCl<sub>3</sub>):

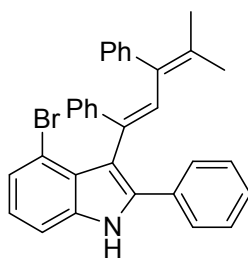

**16**

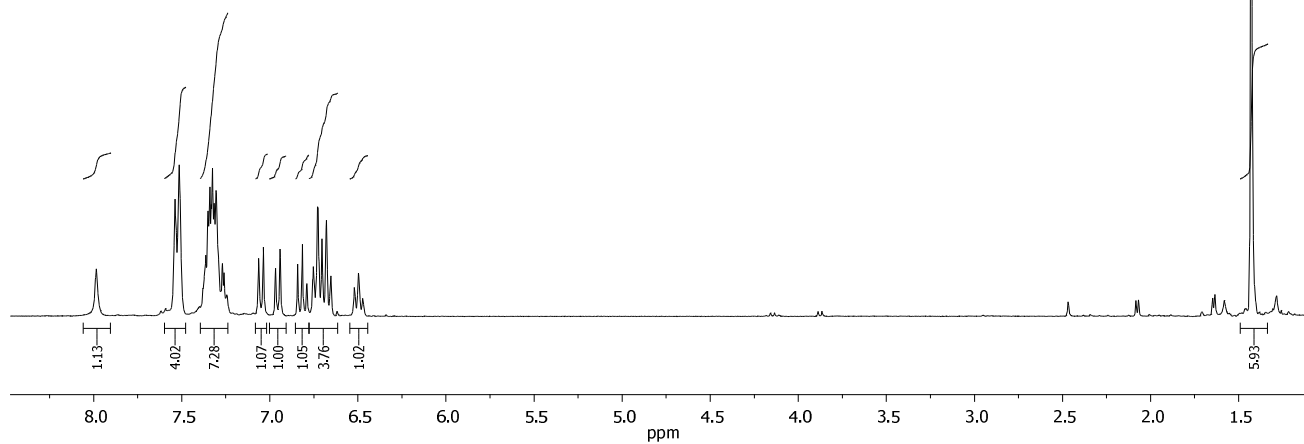

<sup>13</sup>C-NMR (75.4 MHz, CDCl<sub>3</sub>):

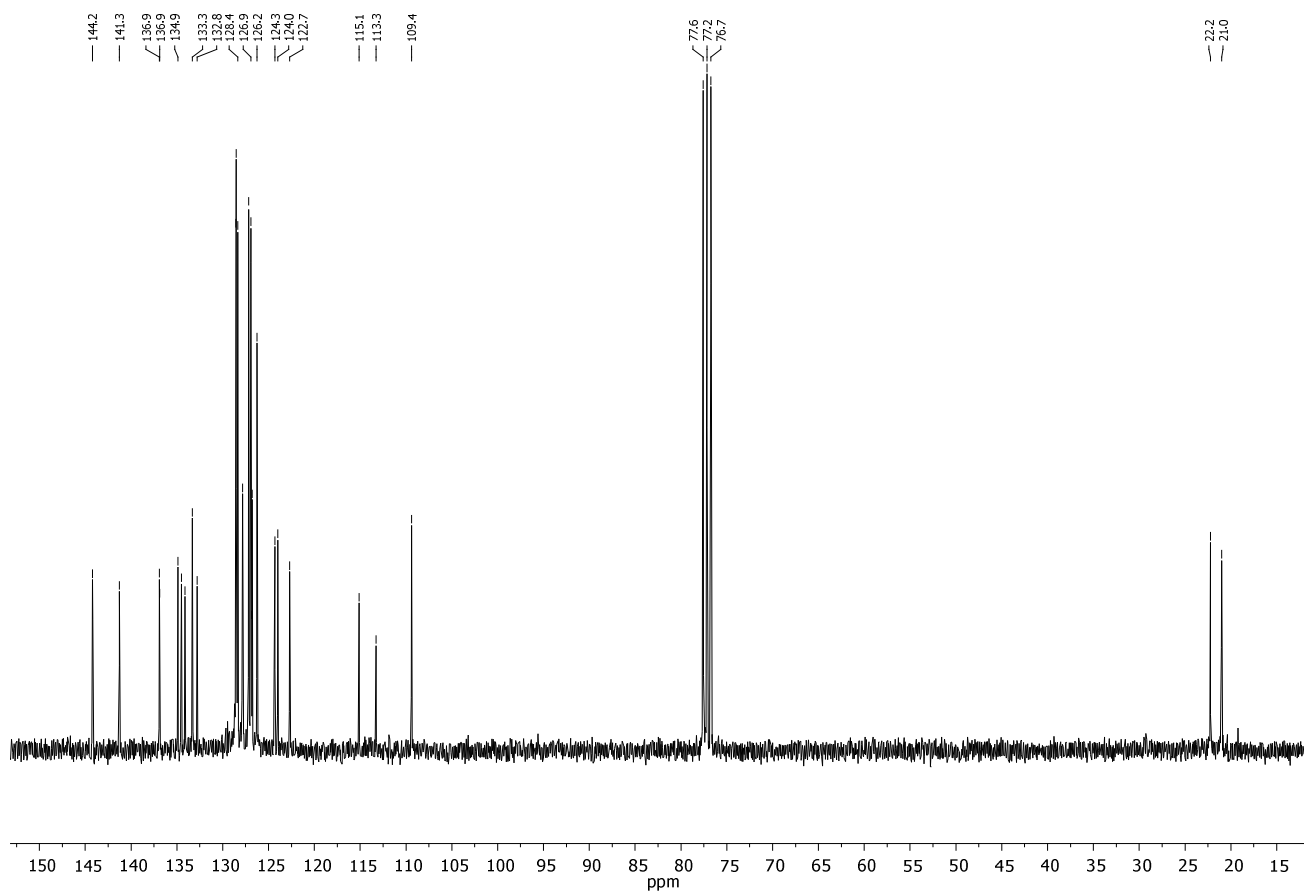

**<sup>1</sup>H-NMR (300 MHz, CDCl<sub>3</sub>):**

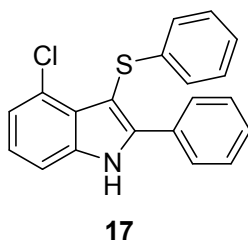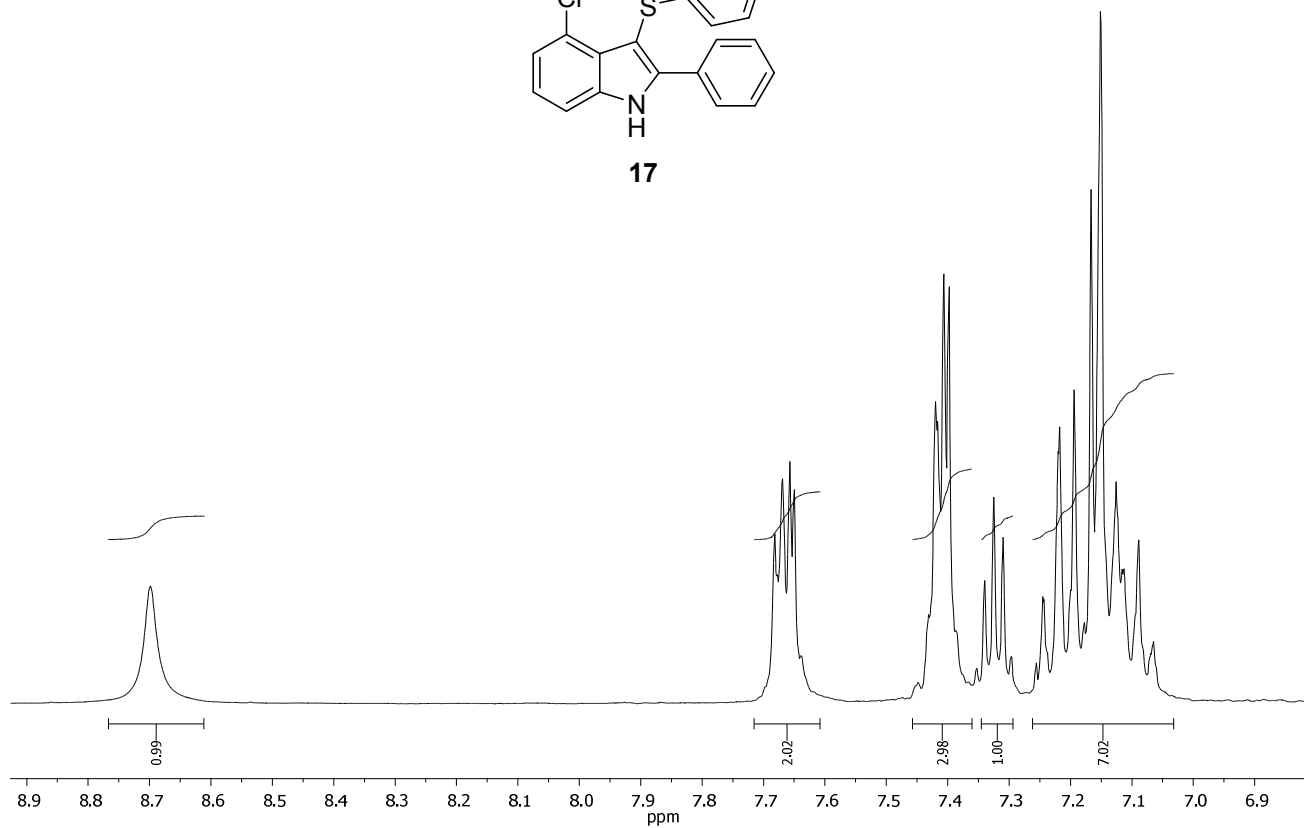

**<sup>13</sup>C-NMR (75.4 MHz, CDCl<sub>3</sub>):**

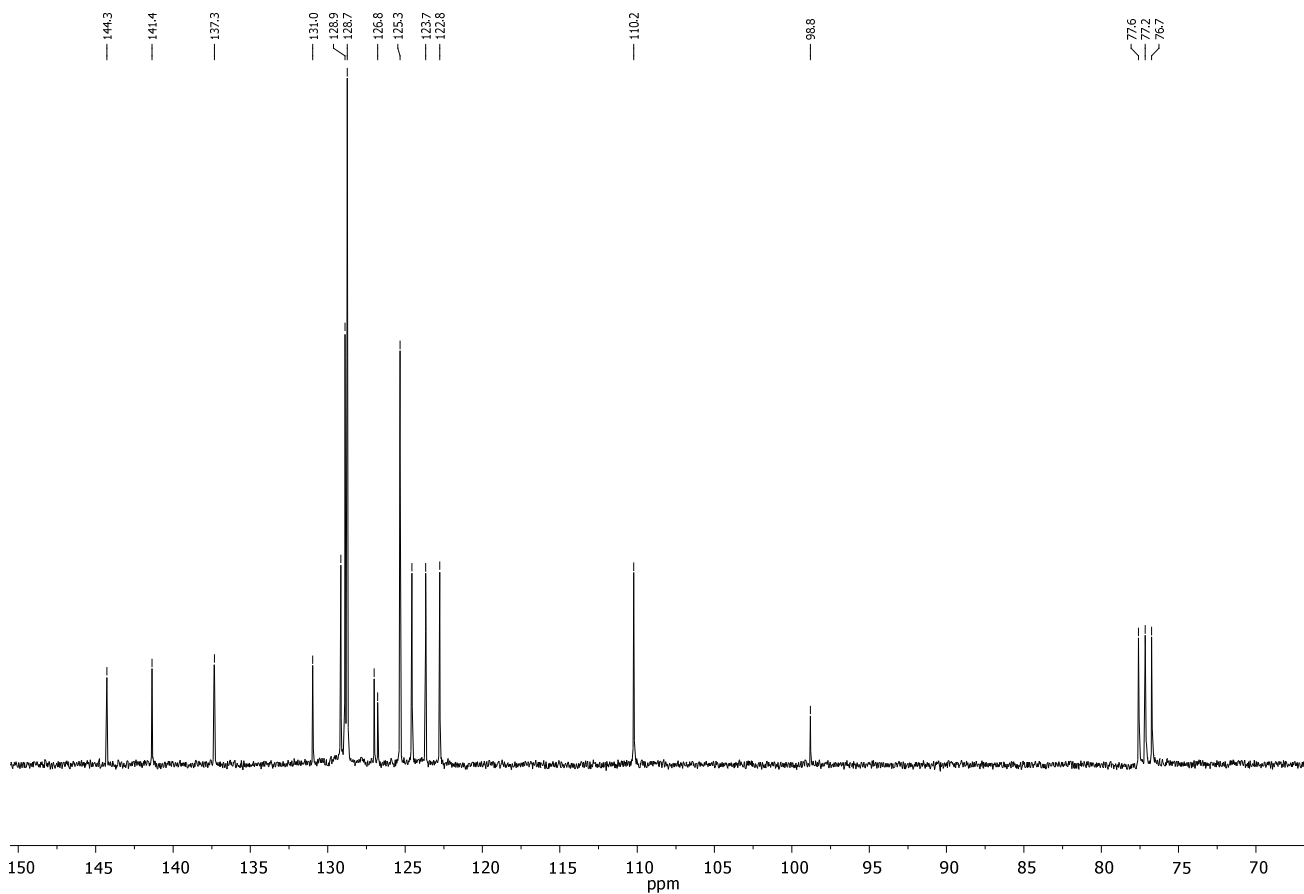

Supplement: c004360e.pdf [file c004360e.pdf]
